# Supplementary material for: Three-Dimensional Envelope and Subunit Interactions of the Plastid-Encoded RNA Polymerase from Sinapis alba
Source: MDPI journal article supplement (doi:10.3390/ijms23179922), 2022-08-31

## Supplementary Material

### Three-dimensional envelope and subunit interactions of the plastid-encoded RNA polymerase from *Sinapis alba*

**Authors:** Rémi Ruedas<sup>1,†</sup>, Soumiya Sankari Muthukumar<sup>1,2</sup>, Sylvie Kieffer-Jaquinod<sup>3</sup>, François-Xavier Gillet<sup>2,‡</sup>, Daphna Fenel<sup>1</sup>, Grégory Effantin<sup>1</sup>, Thomas Pfannschmidt<sup>2,&</sup>, Yohann Couté<sup>3</sup>, Robert Blanvillain<sup>2\*</sup> and David Cobessi<sup>1\*</sup>

\*corresponding authors: [robert.blanvillain@cea.fr](mailto:robert.blanvillain@cea.fr), [david.cobessi@ibs.fr](mailto:david.cobessi@ibs.fr)

## Supplemental tables

**Table S1:** MS-based proteomic characterization of *S. alba* PEP fraction.

**Table S2:** characterization of proximal proteins in *S. alba* PEP fraction using crosslinking-MS.

## Supplemental figures

**Figure S1:** abundance-based ranking of proteins quantified by MS in PEP enriched samples. Distribution of abundances represented as Log2 of normalized and summed iBAQ values of individual proteins detected in three independent PEP samples (Table S1). Identified subunits of individual complexes are color-coded (blue: PAPs; orange:  $\alpha$ ,  $\beta$ ,  $\beta'$  and  $\beta''$  subunits; green: histones). The annotated zoom-in shows the 24 most abundant proteins in the ranking.

**Figure S2-5:** sequence alignment of the  $\alpha$ ,  $\beta$ ,  $\beta'$  and  $\beta''$  subunits from PEP of angiosperms with those of the RNAPs from *E. coli*, *T. thermophilus* and Nostoc. S3) Sequence alignment of the  $\alpha$  subunits, S2) sequence alignment of the  $\beta$  subunits S3) Sequence alignment of the N-terminal part from  $\beta'$  subunit with  $\beta'$  subunit from PEP, S4) Sequence alignment of the C-terminal part from  $\beta'$  subunit with the  $\beta''$  subunit from PEP. The residues conserved more than 50 % are in red, those mutated in similar residues are in blue. The strictly conserved residues described by Lane & Darst (Lane & Darst, 2010) are highlighted in gray. The blue triangles show mutations observed among the strictly conserved residues described (Lane & Darst, 2010). The non-conservative mutations, at least three in a row in the  $\beta$  or  $\beta'$  domain in *E. coli* and *T. thermophilus*, are high-lighted in green and displayed on the *E. coli* structure (PDB entry: 6GH5). Those colored in orange are nearby to the DNA, those in green are located at the surface of the subunits. The domains described for all-RNA polymerase (a) and the bRNAPs (b) are also given and highlighted in yellow and cyan respectively. The name of the RNAP domains are also given and highlighted in purple and green (Lane & Darst, 2010; Sutherland & Murakami, 2018).

**Figure S6:** view of the catalytic core from the *E. coli* RNAP (PDB entry: 3LU0 (Opalka *et al.*, 2010)) manually fitted into the envelope of PEP using Chimera (Pettersen *et al.*, 2004).

**Figure S7a and S7b:** overall shape of the a) human RNA polymerase II (EMDB entry: EMD-2194; Kassube *et al.*, 2013) and b) yeast RNA polymerase III (EMDB entry: EMD-1753; Vanini *et al.*, 2010) solved at 25 and 21 Å respectively.

**Figure S8:** FSC curve for the PEP 3D reconstruction calculated between two independent half maps (gold standard FSC). The dotted line represents the FSC=0.143 cutoff used to determine the resolution.

**Data source:** rpos collection from the green lineage

**Figure S1 :** abundance-based ranking of proteins quantified by MS in PEP enriched samples. Distribution of abundances represented as Log2 of normalized and summed iBAQ values of individual proteins detected in three independent PEP samples (Table S1). Identified subunits of individual complexes are color-coded (blue: PAPs; orange:  $\alpha$ ,  $\beta$ ,  $\beta'$  and  $\beta''$  subunits; magenta: histones). The annotated zoom-in shows the 24 most abundant proteins in the ranking.

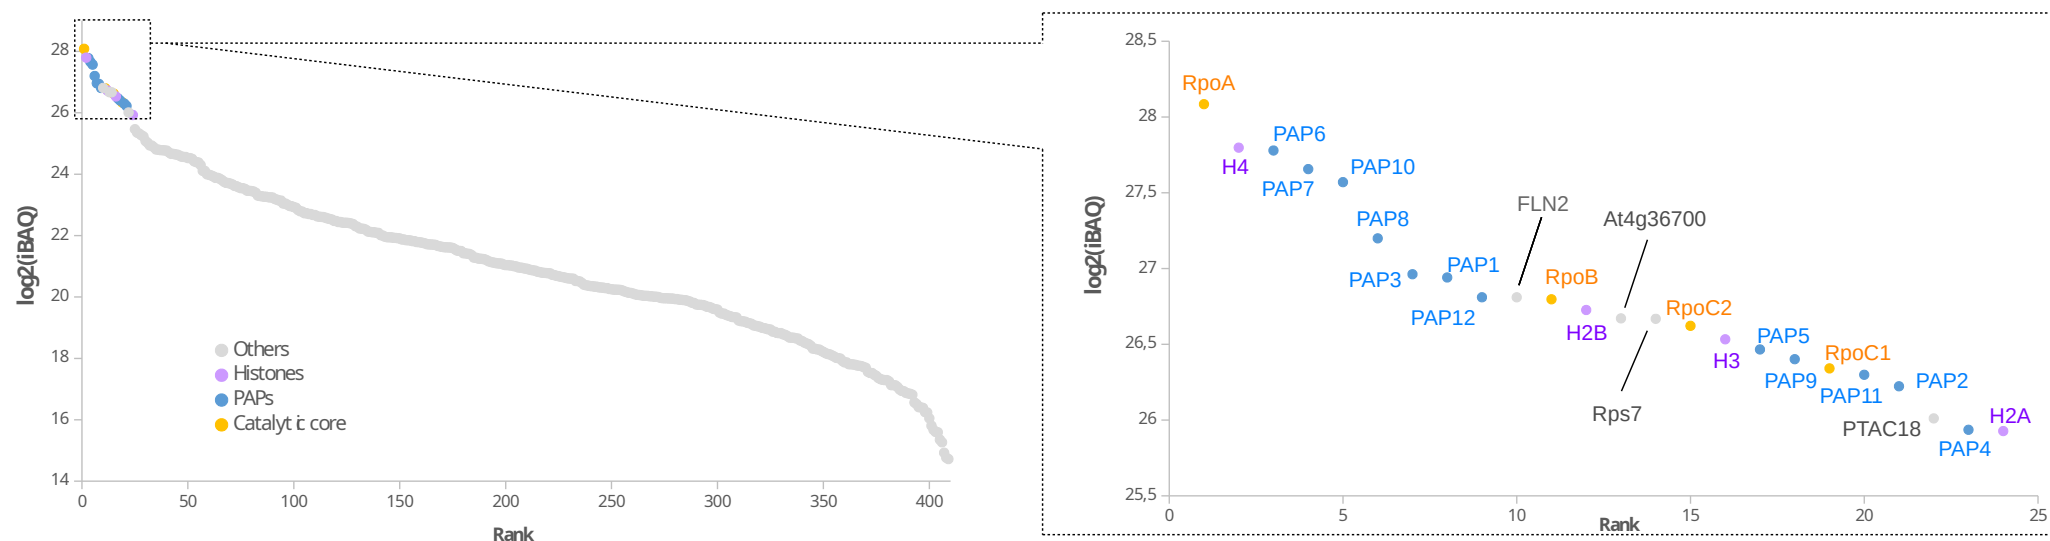

**Figure S2:** sequence alignment of the  $\alpha$  subunits from PEP of angiosperms with those of the RNAPs from *E. coli*, *T. thermophilus* and Nostoc. The residues conserved more than 50 % are in red, those mutated in similar residues are in blue. The strictly conserved residues described by Lane & Darst (Lane & Darst, 2010) are highlighted in gray. The blue triangles show mutations observed among the strictly conserved residues described (Lane & Darst, 2010). The non-conservative mutations, at least three in a row in the  $\beta$  or  $\beta'$  domain in *E. coli* and *T. thermophilus*, are highlighted in green and displayed on the *E. coli* structure (PDB entry: 6GH5). Those colored in orange are nearby to the DNA, those in green are located at the surface of the subunits. The domains described for all-RNA polymerase (a) and the bRNAPs (b) are also given and highlighted in yellow and cyan respectively. The name of the RNAP domains are also given and highlighted in purple and green (Lane & Darst, 2010; Sutherland & Murakami, 2018).



|                        |     | <b>α-NTD</b> |                                                        |
|------------------------|-----|--------------|--------------------------------------------------------|
| <i>T. thermophilus</i> | 120 | VEIMNPD      | LHIATL-EEGRLNMEVRVDRGVYVPAEKHGI---KDRINAI              |
| <i>E. coli</i>         | 121 | VEIVKPQHV    | ICHLDENASISMRIVQGRGRYVPASTRIHSEEDERPIGRLLVDACYS        |
| 0_Nostoc               | 118 | VEVIDPTQY    | VATI-AEGGKLEMEFRIERQKGYRTVERGRE---EATSLDFLQIDSVFMPVRN  |
| 1_Litchi               | 127 | VEIIDNTQHI   | ASL-AEPIDFCIGLQIERNRGYN                                |
| 2_Arabidopsis          | 127 | VEIIDNTQHI   | ATL-TEPIDLCIELKIERNRGYS                                |
| 3_Gossypium            | 129 | VEIVDNTQH    | VASL-TEPIDLCIGLQIERNRGY                                |
| 5_Ricinus              | 127 | VEIIDNTQHI   | ASL-TEPIDLCIGLQIERNRGYRIKPTNNF---HE---GSYPIDAVFMPVRN   |
| 6_Rosa                 | 127 | VEIVDNTQH    | IANL-TEPINLCIQLQIERNRGYRIKPTNNF---QD---GSYPIDAVFMPVRN  |
| 9_Cucumis              | 135 | VEIVDNTQH    | IANL-TEPINFCIELKIERNRGYHIQTPTNNF---QD---ASYPMDAIFMPVRN |
| 11_Nicotiana           | 127 | VEIVDNTQH    | IASL-TEPIDFCIGLQIERNRGYL                               |
| 13_Syringa             | 127 | VEIVDNTQH    | IASL-TEPIDLCIGLQIERNRGYL                               |
| 18_Liquidambar         | 127 | VEIVDNTQH    | IASL-TEPIDLCIGLQIERNRGYRIKPTNNF---QD---GSYPIDAVFMPVRN  |
| 19_Papaver             | 127 | VEIVDNTQH    | IASL-TEPIDLCIGLQIERNRGYRIKPTNNF---QD---GSYPIDAVFMPVRN  |
| 20_Ananas              | 127 | VEIVDNTQH    | IASL-TEPIDLCIGLQIERNRGYRIKPTNNF---QD---GSYPIDAVFMPVRN  |
| 28_Liriodendron        | 127 | VEIVDNTQH    | IASL-TEPIDLCIGLQIERNRGYRIKPTNNF---QD---GSYPIDAVFMPVRN  |
| 30_Magnolia            | 127 | VEIVDNTQH    | IASL-TEPIDLCIGLQIERNRGYRIKPTNNF---QD---GSYPIDAVFMPVRN  |
| 32_Nymphaea            | 127 | VEIVDNTQH    | IASL-TEPIDLCIGLQIERNRGYRIKPTNNF---QD---GSYPIDAVFMPVRN  |
| 33_Amborella           | 127 | VEIVDNTQH    | IASL-TEPIDLCIGLQIERNRGYRIKPTNNF---QD---GSYPIDAVFMPVRN  |
| 35_Picea               | 127 | VEIVDNTQH    | IASL-TEPIDLCIGLQIERNRGYRIKPTNNF---QD---GSYPIDAVFMPVRN  |
| 44_Ginkgo              | 127 | VEIVDNTQH    | IASL-TEPIDLCIGLQIERNRGYRIKPTNNF---QD---GSYPIDAVFMPVRN  |
| 51_Physcomitrium       | 239 | LEVDTPTQH    | IAYL-TKEVSLDIELDVEKGCYRMDGHTKS---GD---GRFYIDSVFMPVRN   |

|                        |     | <b>α-NTD</b> |                                  | <b>α-CTD</b>                |                                    |
|------------------------|-----|--------------|----------------------------------|-----------------------------|------------------------------------|
| <i>T. thermophilus</i> | 195 | LTLRIWTDGS   | VTPLLEALNQAVEILREHLTYFSNPQAAVAAP | EAKE-----                   | PEAPPEQEEDLDPL                     |
| <i>E. coli</i>         | 201 | LVIEMETNG    | TIDPEEAIRRAATILAEQLEAFV          | DLRVRQ--PE--V-----          | KEEKPEFDPILLRPV                    |
| 0_Nostoc               | 194 | LLLEVW       | TNGSISPQALSSAAGILV               | DLFNLKDISLEPTD-----         | T-----GSEISEDPTAQIPI               |
| 1_Litchi               | 199 | LFLIEWTNG    | SLTPKEALHEASRN                   | LIDLFIPFLQAAE--ENLHLENNQYKV | SLPYLTFDRDRAKLKKK--KEIAGKSIFI      |
| 2_Arabidopsis          | 199 | LFLIEWTNG    | SLTPKEALHEASRN                   | LIDLFIPFLHVEE--ETFYLENNQH   | QVTLPPFFPHNRLVNLRKKKKT             |
| 3_Gossypium            | 201 | LFLIEWTNG    | SLTPKEALHEASRN                   | LIDLFIPFLHTEE--ENLHLENNQH   | HDVTLPPFFPHDRLLVKLTKKK--KEIALKYIFI |
| 5_Ricinus              | 199 | LFLIEWTNG    | SLTPKEALHEASRN                   | LIDLFIPFLHAAE--ENFHLLEKNQ   | HKVTLPLFTFYDRLTKLRKNQ--NEITLKYVFI  |
| 6_Rosa                 | 199 | LFLIEWTNG    | SLTPKEALHEASRN                   | LIDLFIPFLHAAE--ENFHFENNQH   | KVTLPLFTFHDKFANPRKS--TEITLKYIFI    |
| 9_Cucumis              | 207 | LFLIEWTNG    | SLTPKEALHEASRN                   | LIDLFIPFLHAAE--ENFHFENNQH   | KVTLPLFTFHDKFANPRKS--TEITLKYIFI    |
| 11_Nicotiana           | 199 | LFLIEWTNG    | SLTPKEALHEASRN                   | LIDLFIPFLHAAE--ENFHFENNQH   | KVTLPLFTFHDKFANPRKS--TEITLKYIFI    |
| 13_Syringa             | 199 | LFLIEWTNG    | SLTPKEALHEASRN                   | LIDLFIPFLHAAE--ENFHFENNQH   | KVTLPLFTFHDKFANPRKS--TEITLKYIFI    |
| 18_Liquidambar         | 199 | LFLIEWTNG    | SLTPKEALHEASRN                   | LIDLFIPFLHAAE--ENFHFENNQH   | KVTLPLFTFHDKFANPRKS--TEITLKYIFI    |
| 19_Papaver             | 199 | LFLIEWTNG    | SLTPKEALHEASRN                   | LIDLFIPFLHAAE--ENFHFENNQH   | KVTLPLFTFHDKFANPRKS--TEITLKYIFI    |
| 20_Ananas              | 199 | LFLIEWTNG    | SLTPKEALHEASRN                   | LIDLFIPFLHAAE--ENFHFENNQH   | KVTLPLFTFHDKFANPRKS--TEITLKYIFI    |
| 28_Liriodendron        | 199 | LFLIEWTNG    | SLTPKEALHEASRN                   | LIDLFIPFLHAAE--ENFHFENNQH   | KVTLPLFTFHDKFANPRKS--TEITLKYIFI    |
| 30_Magnolia            | 199 | LFLIEWTNG    | SLTPKEALHEASRN                   | LIDLFIPFLHAAE--ENFHFENNQH   | KVTLPLFTFHDKFANPRKS--TEITLKYIFI    |
| 32_Nymphaea            | 199 | LFLIEWTNG    | SLTPKEALHEASRN                   | LIDLFIPFLHAAE--ENFHFENNQH   | KVTLPLFTFHDKFANPRKS--TEITLKYIFI    |
| 33_Amborella           | 197 | LFLIEWTNG    | SLTPKEALHEASRN                   | LIDLFIPFLHAAE--ENFHFENNQH   | KVTLPLFTFHDKFANPRKS--TEITLKYIFI    |
| 35_Picea               | 199 | LFLIEWTNG    | SLTPKEALHEASRN                   | LIDLFIPFLHAAE--ENFHFENNQH   | KVTLPLFTFHDKFANPRKS--TEITLKYIFI    |
| 44_Ginkgo              | 199 | LFLIEWTNG    | SLTPKEALHEASRN                   | LIDLFIPFLHAAE--ENFHFENNQH   | KVTLPLFTFHDKFANPRKS--TEITLKYIFI    |
| 51_Physcomitrium       | 312 | LFLIEWTNG    | SLTPKEALHEASRN                   | LIDLFIPFLHAAE--ENFHFENNQH   | KVTLPLFTFHDKFANPRKS--TEITLKYIFI    |

|                        |     | <b>α-CTD</b> |                                                                      |
|------------------------|-----|--------------|----------------------------------------------------------------------|
| <i>T. thermophilus</i> | 257 | EELGLSTRV    | LHLSLKEEGIESVRALLALNLKDLKNIPGIGERSLEEIKEALEKKGFTLKE-----             |
| <i>E. coli</i>         | 258 | DDLELTVRS    | ANCLKAEAIHYIGDLVQRTEVELLKTPTNLGKKS                                   |
| 0_Nostoc               | 249 | EELQLSV      | RAYNCLKRAQVNSVADLLDYTQEDLLEIKNF                                      |
| 1_Litchi               | 275 | DQPELS       | PRINCLKKSNIHTLFDLLNKSQEDLMKIEHFRIEDVKQILGILEKK-----                  |
| 2_Arabidopsis          | 277 | DQLELP       | PRINCLKKSNIHTLFDLLNKSQEDLMKIEHFRIEDVKQILGILEKK-----                  |
| 3_Gossypium            | 277 | DQSELPP      | RIYNCLKKSNIHTLFDLLNKSQEDLMKIEHFRIEDVKQILGILEKK-----                  |
| 5_Ricinus              | 275 | DQSELTP      | KIYNCLKRSNIHTLFDLLNKSQEDLMKIEHFRIEDVKQILGILEKK-----                  |
| 6_Rosa                 | 275 | DQSELPP      | RVYNCLKRSNIHTLFDLLNKSQEDLMKIEHFRIEDVKQILGILEKK-----                  |
| 9_Cucumis              | 285 | DQSELPP      | RIYNCLKRSNIHTLFDLLNKSQEDLMKIEHFRIEDVKQILGILEKK-----                  |
| 11_Nicotiana           | 275 | DQSELPS      | RIYNCLKRSNIHTLFDLLNKSQEDLMKIEHFRIEDVKQILGILEKK-----                  |
| 13_Syringa             | 275 | DQSEFSP      | RVYNCLKRSNIHTLFDLLNKSQEDLMKIEHFRIEDVKQILGILEKK-----                  |
| 18_Liquidambar         | 275 | DQSELPP      | RIYNCLKRSNIHTLFDLLNKSQEDLMKIEHFRIEDVKQILGILEKK-----                  |
| 19_Papaver             | 275 | DQSELSP      | RIYNCLKRSNIHTLFDLLNKSQEDLMKIEHFRIEDVKQILGILEKK-----                  |
| 20_Ananas              | 275 | DQLELPS      | RTYNCLKRSNIHTLFDLLNKSQEDLMKIEHFRIEDVKQILGILEKK-----                  |
| 28_Liriodendron        | 275 | DQSELPP      | RTYNCLKRSNIHTLFDLLNKSQEDLMKIEHFRIEDVKQILGILEKK-----                  |
| 30_Magnolia            | 275 | DQSELPP      | RTYNCLKRSNIHTLFDLLNKSQEDLMKIEHFRIEDVKQILGILEKK-----                  |
| 32_Nymphaea            | 274 | DQLELPP      | RTYNCLKRSNIHTLFDLLNKSQEDLMKIEHFRIEDVKQILGILEKK-----                  |
| 33_Amborella           | 275 | DQLELSP      | RTYNCLKRSNIHTLFDLLNKSQEDLMKIEHFRIEDVKQILGILEKK-----                  |
| 35_Picea               | 276 | DQLEFPP      | RVYNCLKRSNIHTLFDLLNKSQEDLMKIEHFRIEDVKQILGILEKK-----                  |
| 44_Ginkgo              | 275 | DQSELPP      | RVYNCLKRSNIHTLFDLLNKSQEDLMKIEHFRIEDVKQILGILEKK-----                  |
| 51_Physcomitrium       | 385 | DQLRIP       | SKAYNSLKRANINTVSDLLDYTQDILLSIPNFGGRKSVDDILEALQAQF--SIDLPENNPLCN----- |

**Figure S3:** sequence alignment of the  $\beta$  subunits from PEP of angiosperms with those of the RNAPs from *E. coli*, *T. thermophilus* and Nostoc. The residues conserved more than 50 % are in red, those mutated in similar residues are in blue. The strictly conserved residues described by Lane & Darst (Lane & Darst, 2010) are highlighted in gray. The blue triangles show mutations observed among the strictly conserved residues described (Lane & Darst, 2010). The non-conservative mutations, at least three in a row in the  $\beta$  or  $\beta'$  domain in *E. coli* and *T. thermophilus*, are highlighted in green and displayed on the *E. coli* structure (PDB entry: 6GH5). Those colored in orange are nearby to the DNA, those in green are located at the surface of the subunits. The domains described for all-RNA polymerase (a) and the bRNAPs (b) are also given and highlighted in yellow and cyan respectively. The name of the RNAP domains are also given and highlighted in purple and green (Lane & Darst, 2010; Sutherland & Murakami, 2018).



|                        |   | β1 domain: Q22-N130 + V336-S392                                                  |             |
|------------------------|---|----------------------------------------------------------------------------------|-------------|
|                        |   | βa1:P16-L30                                                                      | βa2:G43-R49 |
|                        |   | βb1:P16-L30                                                                      | βb2:G43-G60 |
| <i>T. thermophilus</i> | 1 | -----MEIKRFGRIREVIPLPPLTEIQVESYRRALQADVPPEKRENVGIQAARFETFPFIEEDKGGKGLV           |             |
| <i>E. coli</i>         | 1 | -----MVYSYTEKKRIRKDFGKRQPVLDVYPYLLSIQLDSFQKFIEQDPEG---QYGLEAARFVSFPFIQSYS---GNSE |             |
| 0_Nostoc               | 1 | -----MTKETYMFAFLLPDLIEIQRSSFRWFLEEGLEIEL-----NSFSPTIDTYGKLELH                    |             |
| 1_Litchi               | 1 | -----MRGDVNRMSTIPGFNQIQFEGFCRFIDQGLTEEL-----YKFPKIEDTDQEIEFQ                     |             |
| 2_Arabidopsis          | 1 | -----MLGDEKEGTSAPGFNQIQFEGFYRFIDQGLIEEL-----AKFPKIEDIDHEIEFQ                     |             |
| 3_Gossypium            | 1 | -----MLGDENGEMSTIPGLNQIQFEGFCGFMDRGLTEEL-----YKFPKIEDTEQEIEFQ                    |             |
| 5_Ricinus              | 1 | -----MLGDGNEGEMSTIPGLNQIQFEGFCRFIDQGLTEEL-----YKFPKIEDTDQEIEFQ                   |             |
| 6_Rosa                 | 1 | -----MLGGGNEAISTIPGFNQIQFEGFCRFIDQGLTEEL-----YKFPKIEDTDQEIEFQ                    |             |
| 9_Cucumis              | 1 | MMNQIMGFFFYKWEINKMLGGGNERMSTIPGFNQIQFEGFCRFIDHGLTEEL-----SKFPKIEDTDQEIEFQ        |             |
| 11_Nicotiana           | 1 | -----MLGDGNEGISTIPGFNQIQFEGFCRFIDQGLTEEL-----YKFPKIEDTDQEIEFQ                    |             |
| 13_Syringa             | 1 | -----MLGDGNEGEMSTIPGFNQIQFEGFCRFIDQGLTEEL-----YKFPKIEDTDQEIEFQ                   |             |
| 18_Liquidambar         | 1 | -----MLRDGNEGEMSTIPGLNQIQFEGFCRFIDQGLTEEL-----YKFPKIEDTDQEIEFQ                   |             |
| 19_Papaver             | 1 | -----MLRDGNEGEMSTIPGFSQIQFEGFCRFIDQGLMEEL-----YKFPKIEDTDQEIEFQ                   |             |
| 20_Ananas              | 1 | -----MLRNGNEGEMSTIPGFSQIQFEGFCRFINQGLTEEF-----HKFPKIEDTDQEIEFQ                   |             |
| 28_Liriodendron        | 1 | -----MFSINGKLKMLRDGNEGEMSTIPGFSQIQFEGFCRFIDQGLTEEL-----HKFPKIEDTDQEIEFQ          |             |
| 30_Magnolia            | 1 | -----MFSINGKLKMLRDGNEGEMSTIPGFSQIQFEGFCRFIDQGLTEEL-----HKFPKIEDTDQEIEFQ          |             |
| 32_Nymphaea            | 1 | -----MLRDGGDEEMFTIPGFSQIQFEGFCRFIDQGLMEEL-----HQFPKIEDTDQEIEFQ                   |             |
| 33_Amborella           | 1 | -----MLRDGNEGEMSTIPGFSQIQFEGFCRFVDQGLAEEL-----HKFPKIEDTDQEIEFQ                   |             |
| 35_Picea               | 1 | -----MRLDENEGAFTIPEFGKIQFEGFCRFIDQGLMEEL-----HNFPKIEDTDKEIESR                    |             |
| 44_Ginkgo              | 1 | -----MDGKLPMLLDENKGTSTIPGFGQIQFEGFCRFIDQGLIEEL-----SNFPEIEYTDQEIESR              |             |
| 51_Physcomitrium       | 1 | -MKK-IITL---SAPPPSQFSFLSEFQFSLPELRQIQFKSYFYFIYKNLISEL-----NIFPEIFDLNQEFQFE       |             |

|                        |    | β1 domain: Q22-N130 + V336-S392                                                   |               |
|------------------------|----|-----------------------------------------------------------------------------------|---------------|
|                        |    | βa3:F78-I101                                                                      | βa4:E112-F148 |
|                        |    | βb3:L64-I101                                                                      | βb4:D111-F148 |
| <i>T. thermophilus</i> | 66 | LDFLEYRLGEPFPQDECREKDLTYQAPLYARLQLHKD-----TGLIKEDEVFLGHIPLMTEDGSFIINGADRVIVS      |               |
| <i>E. coli</i>         | 68 | LQYVSYRLGEPVFDVQECQIRGVITYSAPLRVKRLVLYIERAEPEGTVKDIKEQEVYMGIEPLMTDNGTFVINGTERVIVS |               |
| 0_Nostoc               | 53 | FLGQNYKLEKPKYSVEAKRRDSTYAVQMYVPTRLINKE-----TGEIKEQEVFGIDPLMTDRGTFIINGARVIVN       |               |
| 1_Litchi               | 52 | LFVETYQLVEPLIKERDAVYESLTYSEELYVSAGLIWKS-----RGDMQEQTIFIGNIPLMNSLGTISVNGIYRIVIN    |               |
| 2_Arabidopsis          | 52 | LFVETYQLVEPLIKERDAVYESLTYSEELYVSAGLIWKT-----SRNMQEQRIFIGNIPLMNSLGTISVNGIYRIVIN    |               |
| 3_Gossypium            | 52 | LFVETYQLVEPLIKERDAVYESLTYSEELYVSAGLIWKT-----SKDMQEQTIFIGNIPLMNSLGTISVNGIYRIVIN    |               |
| 5_Ricinus              | 52 | LFVETYQLVEPLIKEGDAVYESLTYSEELYVSAGLIWKT-----SRDMQEQTIFIGNIPLMNSLGTIFINGIYRIVIN    |               |
| 6_Rosa                 | 52 | LFVETYQLVEPLIKERDAVYESLTYSEELYVSAGLIWKN-----SRDMQEQTIFIGNIPLMNSLGTISVNGIYRIVIN    |               |
| 9_Cucumis              | 70 | LFVETYKLVEPLIKERDAVYESLTYSEELYVSAGLIWKT-----RRDMQEQTIFIGNIPLMNSLGTISVNGLYRIVIS    |               |
| 11_Nicotiana           | 52 | LFVETYQLVEPLIKERDAVYESLTYSEELYVSAGLIWKN-----SRDMQEQTIFIGNIPLMNSLGTISVNGIYRIVIN    |               |
| 13_Syringa             | 52 | LFVETYQLVEPLIKERDAVYESLTYSEELYVSAGLIWKT-----SRDMQEQTIFIGNIPLMNSLGTISVNGIYRIVIN    |               |
| 18_Liquidambar         | 52 | LFVETYQLVEPLIKERDAVYESLTYSEELYVSAGLIWKS-----SGDMQEQTIFIGNIPLMNSLGTISVNGIYRIVIN    |               |
| 19_Papaver             | 52 | LFVETYQLVEPLIKERDAVYESLTYSEELYVPAGLIWKT-----GRDIQEQTIFIGNIPLMNSLGTIFVNGIYRIVIN    |               |
| 20_Ananas              | 52 | LFAERYQLVEPLIKERDAVYESLTYSEELYVPAGLIWKT-----GRDMQEQTIFIGNIPLMNSLGTISVNGIYRIVIN    |               |
| 28_Liriodendron        | 61 | LFVETYQLVEPLIKERDAVYESLTYSEELYVPAGLIWKT-----GRDMQEQTIFIGNIPLMNSLGTISVNGIYRIVIN    |               |
| 30_Magnolia            | 61 | LFVETYQLVEPLIKERDAVYESLTYSEELYVPAGLIWKT-----GRDMQEQTIFIGNIPLMNSLGTISVNGIYRIVIN    |               |
| 32_Nymphaea            | 53 | LFEEYQLVEPLIKERDAVYESITYSEELYVPAGLIWRT-----GRNMQEQTIVLGNIPLMNSLGTISVNGIYRIVIN     |               |
| 33_Amborella           | 52 | LLVETYQLAEPLIKERDAVYESLTHSEELYVPAGLIWKN-----GRDMQEQTIFIGNIPLMNSLGTIFVNGIYRIVIN    |               |
| 35_Picea               | 52 | LFGNEYELAEPIKERDAVYESLTYSEELYVPARSIRRN-----SSKIQKQTVFLGNIPLMNSLGTIFVNGIYRIVIN     |               |
| 44_Ginkgo              | 58 | LSGKKYKSAEPLIEERNAVYQSLTYSEELYVPARLIQKN-----RRKIQKQTVFLGNIPLMNSRGTFFVNGISRIVVD    |               |
| 51_Physcomitrium       | 65 | LLNKEYKLIKPEKTT---IKFHYNTYSSDLVYTCRLLRK-----KKIEIQKQTFITGSIPLIDYQSTFRINSVTRVIVIN  |               |

|                        |     | β2 domain: R142-D324                                                              |               |
|------------------------|-----|-----------------------------------------------------------------------------------|---------------|
|                        |     | βa5:F191-G201                                                                     |               |
|                        |     | βb5:Y158-L165                                                                     | βb6:R168-Y202 |
| <i>T. thermophilus</i> | 139 | QIHRSPGVYFTDPARP--GRY-IASIIPLPKRGPWIDLEVEPNGVSMKVN-KRKFLVLVLLRVLGYDQETLARELGAY    |               |
| <i>E. coli</i>         | 148 | QLHRSPGVVFDSDKGKTHSSGKVLNARIIPYRGSWLDFFDPKDNLFVRIDRRRLPATIILRALNYTTEQILDLF--F     |               |
| 0_Nostoc               | 126 | QIVRSPGVYKSEIDKN--GRR-TYSASLIPNRGAWLKFEIDRNDLVWVRIDKTRKLSAQVLLKALGLSDNEIFDAL--RH  |               |
| 1_Litchi               | 125 | QILQSPGIYYQSEFDHN--GIL-IYAGTIISDWGGRLELEIDRKARIWARVSRKQKISILVSSAMGSLNREILENI-CY   |               |
| 2_Arabidopsis          | 125 | QILQSPGIYYQSELDHN--GIS-VYTGTIISDWGGRLELEIDRKARIWARVSRKQKISILVSSAMGSLNREILENV-CY   |               |
| 3_Gossypium            | 125 | QILQSPGIYYRSELDHN--GIS-VYTGTIISDWGGRLELEIDRKARIWARVSRKQKISILVSSAMGSLNREILENV-CY   |               |
| 5_Ricinus              | 125 | QILQSPGIYYRSELDHN--GIS-VYTGTIISDWGGRVELEIDRKARIWARVSRKQKISILVSSAMGSLNREILENV-RY   |               |
| 6_Rosa                 | 125 | QILQSPGIYYRSELDHN--GIS-VYTGTIISDWGGRLELEIDRKARIWARVSRKQKISILVSSAMGSLNREILENA-RY   |               |
| 9_Cucumis              | 143 | QILQSPGIYYRSELDHN--GIS-VYTGTIISDWGGRLELEIDRKARIWARVSRKQKISILVSSAMGSLNREILENV-CY   |               |
| 11_Nicotiana           | 125 | QILQSPGIYYRSELDHN--GIS-VYTGTIISDWGGRSELEIDRKARIWARVSRKQKISILVSSAMGSLNREILENV-CY   |               |
| 13_Syringa             | 125 | QILQSPGIYYRSELDHN--GIS-VYTGTIISDWGGRSELEIDRKARIWARVSRKQKISILVSSAMGSLNREILDNV-CY   |               |
| 18_Liquidambar         | 125 | QILQSPGIYYRSELDHN--GIS-IYTGTIISDWGGRLELEIDRKARIWARVSRKQKISILVSSAMGSLNREILENV-CY   |               |
| 19_Papaver             | 125 | QILQSPGIYYRSELDHN--GIS-VYTGTIISDWGGRSELEIDRKARIWARVSRKQKISILVSSAMGSLNREILDNV-CY   |               |
| 20_Ananas              | 125 | QILQSPGIYYRSELDHN--GIS-VYTSTIISDWGGRSEFEIDRKARIWARVSRKQKISILVSSAMGSLNREILDNV-CY   |               |
| 28_Liriodendron        | 134 | QILQSPGIYYRSELDHN--GIS-VYTGTIISDWGGRSELEIDRKARIWARVSRKQKISILVSSAMGSLNREILDNV-CY   |               |
| 30_Magnolia            | 134 | QILQSPGIYYRSELDHN--GIS-VYTGTIISDWGGRSELEIDRKARIWARVSRKQKISILVSSAMGSLNREILDNV-CY   |               |
| 32_Nymphaea            | 126 | QILQSPGIYYSTGLDHN--GIS-VYTGTIISDWGGRSELEIDRKARIWARVSRKQKISILVSSAMGSLNREILDNV-CY   |               |
| 33_Amborella           | 125 | QILQSPGIYYSSSELDHN--GIS-VYTGTIISDRGGRSELEIDRKARIWARVSRKQKISILVLPAMGSLNREILDNV-CY  |               |
| 35_Picea               | 125 | QILISPGIYYRSELDHN--RINYIYTGTIISDWGGRSKLEIDVGERIWARVSRKQKISIPVLLSAMGLNLEEILDNT-RY  |               |
| 44_Ginkgo              | 131 | QILRSPGIYYSSSEPGHN--GIA-IYTGTIISDWGGRPKLEIDGKTRIWARVSRKQKISIPVLLSAMGSNFEEILDNV-CY |               |
| 51_Physcomitrium       | 137 | QILRSPGIYYNSELDHN--GIS-IYTGTIISDWGGRKLLEIDSKTRIWARISKKRKVSILVLLLAMGLTIKQILDSV-CS  |               |

|                        |     |                                                                                  |       |
|------------------------|-----|----------------------------------------------------------------------------------|-------|
| <i>T. thermophilus</i> | 215 | GELVQGLM-----                                                                    |       |
| <i>E. coli</i>         | 226 | EKVIFEIRDNKLQMELVPERLRGETASFDIEANGKVYVEKGRRITARHIRQLEKDDVKLIEVPVEYIAGKVVAKYDIDES |       |
| 0_Nostoc               | 202 | PEYFQKTE-----                                                                    |       |
| 1_Litchi               | 201 | PEIFLSFLT-----                                                                   | KE    |
| 2_Arabidopsis          | 201 | PEIFLSFLT-----                                                                   | KE    |
| 3_Gossypium            | 201 | PEIFLSFLT-----                                                                   | KE    |
| 5_Ricinus              | 201 | PEIFLSFLND-----                                                                  | KE    |
| 6_Rosa                 | 201 | PEIFLSFLND-----                                                                  | KE    |
| 9_Cucumis              | 219 | PEIFLSFLND-----                                                                  | KE    |
| 11_Nicotiana           | 201 | PEIFLSFLSD-----                                                                  | KE    |
| 13_Syringa             | 201 | PEIFLSFLND-----                                                                  | KE    |
| 18_Liquidambar         | 201 | PEIFLSFLND-----                                                                  | KE    |
| 19_Papaver             | 201 | PEIFLSFPND-----                                                                  | KE    |
| 20_Ananas              | 201 | PEIFLSFPND-----                                                                  | KE    |
| 28_Liriodendron        | 210 | PEIFLSFPND-----                                                                  | KE    |
| 30_Magnolia            | 210 | PEIFLSFPND-----                                                                  | KE    |
| 32_Nymphaea            | 202 | PEIFLSFPNE-----                                                                  | KE    |
| 33_Amborella           | 201 | PEILLYFPNE-----                                                                  | KE    |
| 35_Picea               | 202 | PEKIFFLLKK-----                                                                  | KKGRW |
| 44_Ginkgo              | 207 | PEIFLSFL-----                                                                    | NGRQ  |
| 51_Physcomitrium       | 213 | SKIFLDFLKE-----                                                                  | KK    |

β2 domain: R142-D324

|                        |     |                                                                                  |                                   |
|------------------------|-----|----------------------------------------------------------------------------------|-----------------------------------|
| <i>T. thermophilus</i> | 223 | -----DE-----                                                                     | SVFAMRPEEALIRLFTLLRPGDPPKR--DKAVA |
| <i>E. coli</i>         | 306 | TGELICAAEMELSLDLLAKLSQSGHKRIETLFTNDLDHGPYISETLRVDPTNDRLSALVEIYRMMRPGEPPTR--EAAES |                                   |
| 0_Nostoc               | 211 | -----                                                                            | KEGQFSEEEALMELYRKLRPGEPPTVLG--GQQ |
| 1_Litchi               | 213 | -----                                                                            | KKKIGSKENAILEFYQQFACVGGDPVFSSELCK |
| 2_Arabidopsis          | 213 | -----                                                                            | KKKIGSKENAILEFYQQFSCVGGDPVFSSELCK |
| 3_Gossypium            | 213 | -----                                                                            | KKKIGSKENAILEFYQQFSCVGGDPVFSSELCK |
| 5_Ricinus              | 213 | -----                                                                            | KKKIGSKENAILEFYQQFTCVGGDPVFSSELCK |
| 6_Rosa                 | 213 | -----                                                                            | KKKIGSKENAILEFYQQFACVGGDPVFSSELCK |
| 9_Cucumis              | 231 | -----                                                                            | KKKIGSKENAILEFYQQFSCVGGDPVFSSELCK |
| 11_Nicotiana           | 213 | -----                                                                            | RKKIGSKENAILEFYQQFACVGGDPVFSSELCK |
| 13_Syringa             | 213 | -----                                                                            | RKKIGSKENAILEFYQQFACVGGDPVFSSELCK |
| 18_Liquidambar         | 213 | -----                                                                            | KKKIGSKENAILEFYQQFACVGGDPVFSSELCK |
| 19_Papaver             | 213 | -----                                                                            | KKKIGSKENAILEFYQQFACVGGDPVFSSELCK |
| 20_Ananas              | 213 | -----                                                                            | KKKIGSKENAILEFYQQFACVGGDPVFSSELCK |
| 28_Liriodendron        | 222 | -----                                                                            | KKKIGSKENAILEFYQQFACVGGDPVFSSELCK |
| 30_Magnolia            | 222 | -----                                                                            | KKKIGSKENAILEFYQQFACVGGDPVFSSELCK |
| 32_Nymphaea            | 214 | -----                                                                            | KKKISSKENAILEFYQKFCVGGDPVFSSELCK  |
| 33_Amborella           | 213 | -----                                                                            | KKKIGSKENAILEFYQQFSCVGGDPVFSSELCK |
| 35_Picea               | 217 | -----ER-----                                                                     | EEYIWSKEKAILEFYKKLYCVSGDLVFSSELCK |
| 44_Ginkgo              | 219 | -----KR-----                                                                     | KKYLRSEENAILEFHKKLYCVGGDLVFSSELCK |
| 51_Physcomitrium       | 225 | -----KK-----                                                                     | KEHLQSTEDAMVELYKQLYYIGDDLFSSEIRK  |

β2 domain: R142-D324

|                        |     |                                                                                  |               |               |               |               |
|------------------------|-----|----------------------------------------------------------------------------------|---------------|---------------|---------------|---------------|
| <i>T. thermophilus</i> | 256 | YVYGLIADPRRYDLGEAGRYKAEELGLRISGRTLARFEDGEFKDEVFLPTLRYLFALTAVPGHEVDDIDHGLNRRIRT   | βb7:A234-K280 | βb8:V302-G316 | βa6:D323-V355 | βb9:D323-M359 |
| <i>E. coli</i>         | 384 | LFENLFFSEDRYDL SAVGRMKFNRSLLREEIEGS-----GILSKDDIDVMKKLIDIRNGK--GEVDDIDHGLNRRIRS  |               |               |               |               |
| 0_Nostoc               | 242 | LDSRFDPKRYDLGRVGRYKLNKKLRLSVPDTMRVLTSS-----DILAAVDYLINLEYDI--GNIDIDHGLNRRVRS     |               |               |               |               |
| 1_Litchi               | 246 | ELQKKF-FHQRCCELGRIGRRNMNRRNLNIPQNTFLLPR-----DVLAADHDLIELKFGM--GTLDMMNHLKKNKRIRS  |               |               |               |               |
| 2_Arabidopsis          | 246 | ELQKKF-FHQRCCELGRIGRRINWRNLNIPQNNIFLLPR-----DVLAADHLIGMKFGM--GTLDMMNHLKKNKRIRS   |               |               |               |               |
| 3_Gossypium            | 246 | ELQKKF-FQQRCELGRIGRRNMNRLNLDIPQNTFLLPR-----DILAAADRLIGMKFGM--GPLDDMMNHLKKNKRIRS  |               |               |               |               |
| 5_Ricinus              | 246 | ELQKKF-FQQRCELGRIGRLNMNRRNLNDIPHNTFLLPR-----DILAAADHLIGMKFGM--GTLDMMNHLKKNKRIRS  |               |               |               |               |
| 6_Rosa                 | 246 | ELQKKF-FQQRCELGRIGRRNMNRRNLNDIPQNTFLLPR-----DILAAADHLIGMKFGM--GTLDMMNHLKKNKRIRS  |               |               |               |               |
| 9_Cucumis              | 264 | ELQKKF-FQQRCELGRIGRRNLQRLNLDIPENNTFLLPR-----DILAAADHLIGLKFGM--GTLDMMNHLKKNKRIRS  |               |               |               |               |
| 11_Nicotiana           | 246 | ELQKKF-FQQRCELGRIGRRNMNRRNLNDIPQNTFLLPR-----DILAAADHLIGLKFGM--GALDDMMNHLKKNKRIRS |               |               |               |               |
| 13_Syringa             | 246 | ELQKKF-FQQRCELGRIGRRNMNRRNLNDIPQNTFLLPR-----DILAAADHLIELKFGM--GTLDMMNHLKKNKRIRS  |               |               |               |               |
| 18_Liquidambar         | 246 | ELQKKF-FQQRCELGRIGRRNMNRRLDNIPQNTFLLPR-----DILAAADHLIGMKFGM--GTLDMMNHLKKNKRIRS   |               |               |               |               |
| 19_Papaver             | 246 | ELQKKF-FQQRCELGRIGRRNMNRRNLNDIPQNTFLLPR-----DVLAADHLIGMKFGM--GTLDMMNHLKKNKRIRS   |               |               |               |               |
| 20_Ananas              | 246 | ELQKKF-FQQRCELGRIGRRNMNRRNLNDIPQNTFLLPR-----DVLAADHLIGMKFGM--GTLDMMNHLKKNKRIRS   |               |               |               |               |
| 28_Liriodendron        | 255 | ELQKKF-FQQRCELGRIGRRNMNRRNLNDIPQNTFLLPR-----DVLAADHLIGMKFGM--GTLDMMNHLKKNKRIRS   |               |               |               |               |
| 30_Magnolia            | 255 | ELQKKF-FQQRCELGRIGRRNMNRRNLNDIPQNTFLLPR-----DVLSAADHLIRMKFGM--GTLDMMNHLKKNKRIRS  |               |               |               |               |
| 32_Nymphaea            | 247 | ELQKKF-FQQRCELGRIGRRNMNRLNLDIPQNTFLLPR-----DVLAADHLIGMKFGM--GTLDMMNHLKKNKRIRS    |               |               |               |               |
| 33_Amborella           | 246 | ELQKKF-FQQRCELGRIGRQNMNRLNLDIPQNTFLLPR-----DVLAADHLIGMKFGM--GTLDMMNHLKKNKRIRS    |               |               |               |               |
| 35_Picea               | 252 | ELQKKF-FQQRCELGRIGRRNPQKLNLDIPENEIFSLPQ-----DVLAADVLYIGVKFGM--GTLDIDHGLNRRIRS    |               |               |               |               |
| 44_Ginkgo              | 254 | ELQKKS-LQQRCELGRIGRRNPQKLNLDIPENEIFSLPQ-----DVLAADYSIRVKFGM--GTLDMDHGLKKNKRIRS   |               |               |               |               |
| 51_Physcomitrium       | 260 | ELQKKF-FQQRCELGRIGRLNVNKKLSLDIPENEFLLPQ-----DILAAIDYLIKIKFGI--GTLDIDHGLNRRIRS    |               |               |               |               |

|                        |     | β1 domain: Q22-N130 + V336-S392                                                  |                |
|------------------------|-----|----------------------------------------------------------------------------------|----------------|
|                        |     | βa6:D323-V355                                                                    | βa7:S375-E421  |
|                        |     | βb9:D323-M359                                                                    | βb10:L367-V474 |
| <i>T. thermophilus</i> | 336 | VGELMTDQFRVGLARLARVRERMLMGSE--DSLTPAKLVNSRPLEAAIREFFSRQLSQFKDETNPSSLRHKRRISSAL   |                |
| <i>E. coli</i>         | 456 | VGEMAENQFRVGLVVERAVKERLSLGD--DTLMPQDMINAKPISAAVKEFFGSSQLSQFMDQNNPLSEITHKRRISSAL  |                |
| 0_Nostoc               | 314 | VGELLQNQVRVGLNRLEIRERMTVS--DAEVLTPASLVNPKPLVAAIKEFFGSSQLSQFMDQTNPLAELTHKRRISSAL  |                |
| 1_Litchi               | 317 | VADLLQDQFGLALVRLLENVVRGAIGGAIRHKLMPPTQNLVSTPLTTTYSFFGLHPLSQVLDRTNPQTQIVHGRKLSYL  |                |
| 2_Arabidopsis          | 317 | VADLLQDQFGLALVRLLENVVRGTTISGAIRHKLIPPTQNLVSTPLTTTYSFFGLHPLSQVLDRTNPQTQIVHGRKLSYL |                |
| 3_Gossypium            | 317 | VADLLQDQFGLALVRLLENVVRGTICGAIRHKLIPPTQNLVSTPLTTTYSFFGLHPLSQVLDRTNPQTQIVHGRKLSYL  |                |
| 5_Ricinus              | 317 | VADLLQDQFGLALVRLLENVVRGTICGAIRHKLIPPTQTLVSTPLTTTYSFFGLHPLSQVLDRTNPQTQIVHGRKLSYL  |                |
| 6_Rosa                 | 317 | VADLLQDQFGLALVRLLENVVRGTICGAIRHKLIPPTQNLVSTPLTTTYSFFGLHPLSQVLDRTNPQTQIVHGRKLSYL  |                |
| 9_Cucumis              | 335 | VADLLQDQFGLALVRLLENVVRGTICGAIRHKLIPPTQNLVSTPLTTTYSFFGLHPLSQVLDRTNPQTQIVHGRKLSYL  |                |
| 11_Nicotiana           | 317 | VADLLQDQFGLALVRLLENVVRGTICGAIRHKLIPPTQNLVSTPLTTTYSFFGLHPLSQVLDRTNPQTQIVHGRKLSYL  |                |
| 13_Syringa             | 317 | VADLLQDQFGLALVRLLENVVRGTICGAIRHKLIPPTQNLVSTPLTTTYSFFGLHPLSQVLDRTNPQTQIVHGRKLSYL  |                |
| 18_Liquidambar         | 317 | VADLLQDQFGLALVRLLENVVRGTICGAIRHKLIPPTQNLVSTPLTTTYSFFGLHPLSQVLDRTNPQTQIVHGRKLSYL  |                |
| 19_Papaver             | 317 | VADLLQDQFGLALVRLLENVVRGTICGAIRHKLIPPTQNLVSTPLTTTYSFFGLHPLSHVLDRTNPQTQIVHGRKLSYL  |                |
| 20_Ananas              | 317 | VADLLQDQFGLALVRLLENVVRGTICGAIRHKLIPPTQNLVSTPLTTTYSFFGLHPLSQVLDRTNPQTQIVHGRKLSYL  |                |
| 28_Liriodendron        | 326 | VADLLQDQFGLALVRLLENVVRGTICGAIRHKLIPPTQNLVSTPLTTTYSFFGLHPLSQVLDRTNPQTQIVHGRKLSYL  |                |
| 30_Magnolia            | 326 | VADLLQDQFGLALVRLLENVVRGTICGAIRHKLIPPTQNLVSTPLTTTYSFFGLHPLSQVLDRTNPQTQIVHGRKLSYL  |                |
| 32_Nymphaea            | 318 | VADLLQDQFGLALVRLLENVVRGTICGAIRHKLIPPTQNLVSTPLTTTYSFFGLHPLSQVLDRTNPQTQIVHGRKLSYL  |                |
| 33_Amborella           | 317 | VADLLQDQFGLALVRLLENVVRGTICGAIRHKLIPPTQNLVSTPLTTTYSFFGLHPLSQVLDRTNPQTQIVHGRKLSYL  |                |
| 35_Picea               | 323 | VADLLQDQFGLALVRLLENVVRGTICGAIRHKLIPPTQNLVSTPLTTTYSFFGLHPLSQVLDRTNPQTQIVHGRKLSYL  |                |
| 44_Ginkgo              | 325 | VADLLQDQFGLALVRLLENVVRGTICGAIRHKLIPPTQNLVSTPLTTTYSFFGLHPLSQVLDRTNPQTQIVHGRKLSYL  |                |
| 51_Physcomitrium       | 331 | VADLLQDQFGLALVRLLENVVRGTICGAIRHKLIPPTQNLVSTPLTTTYSFFGLHPLSQVLDRTNPQTQIVHGRKLSYL  |                |

#### Fork-loop 2: S411-R428

|                        |     | βa8:D426-Y471                                                                       | βb10:L367-V474 | βb11:V479-L503 |
|------------------------|-----|-------------------------------------------------------------------------------------|----------------|----------------|
| <i>T. thermophilus</i> | 414 | GPGGTLTRERAGFDVVDVHRTHYGRICPVETPEGANIGLITSLAAYARVDELGFIRTPYRRVVGGVVT--DEVVYMTATEE   |                |                |
| <i>E. coli</i>         | 534 | GPGGTLTRERAGFEVDVHPTHYGRVCPITPEGPNIGLINSLSVYAQTNEYGFLETYPYRKVDGVVT--DEIHYLSAIEE     |                |                |
| 0_Nostoc               | 392 | GPGGTLTRERAGFAVDIHPHYGRICPIETPEGPNAGLIGSLATHARVNQYGFLETYPYRRVVENARVRFDLPVYMTADE-    |                |                |
| 1_Litchi               | 397 | GPGGTLGRTASFRIRDIHPHYGRICPIDTSEGINVGLIGSLAIHARIGYWSLESPPFYEIFEKSKK--MRMLYLSPSID     |                |                |
| 2_Arabidopsis          | 397 | GPGGTLGRTANFRIRDIHPHYGRICPIDTSEGINVGLIGSLAIHARIGDWSLESPPFYEIFEKSKKARIRMLFLSPSQD     |                |                |
| 3_Gossypium            | 397 | GPGGTLGRTANFRIRDIHPHYGRICPIDTSEGINVGLIGSLAIHARIGHWSLESPPFYKIFERSKK--AQMLYLSPSRD     |                |                |
| 5_Ricinus              | 397 | GPGGTLGRTASFRIRDIHPHYGRICPIDTSEGINVGLIGSLAIHAKIGHWSLESPPFYVISEESKK--VRMFYLSPNRE     |                |                |
| 6_Rosa                 | 397 | GPGGTLGRTASFRIRDIHPHYGRICPIDTSEGINVGLIGSLAIHAKIGHWSLESPPFYEISERSKK--VRMLYLSPSKD     |                |                |
| 9_Cucumis              | 415 | GPGGTLGRTASFRIRDIHPHYGRICPIDTSEGINVGLIGSLAIHARIGHWSLESPPFYEIFERF--KGVRVYLSPSRD      |                |                |
| 11_Nicotiana           | 397 | GPGGTLGRTASFRIRDIHPHYGRICPIDTSEGINVGLIGSLAIHARIGHWSLESPPFYEISERSTG--VRMLYLSPSGRD    |                |                |
| 13_Syringa             | 397 | GPGGTLGRTASFRIRDIHPHYGRICPIDTSEGINVGLIGSLAIHARIGHWSLESPPFYEISERSTG--VRMLYLSPSGRD    |                |                |
| 18_Liquidambar         | 397 | GPGGTLGRTASFRIRDIHPHYGRICPIDTSEGINVGLIGSLAIHARIGHWSLESPPFYEISERSKK--VRMLYLSPSRD     |                |                |
| 19_Papaver             | 397 | GPGGTLGRTASFRIRDIHPHYGRICPIDTSEGINVGLIGSLAIHARIGHWSLESPPFYEIFERF--KGVRVYLSPSRD      |                |                |
| 20_Ananas              | 397 | GPGGTLGRTASFRIRDIHPHYGRICPIDTSEGINVGLIGSLAIHVRIGHWSIESPPFYEISEKQKEPQMVYLSPNRD       |                |                |
| 28_Liriodendron        | 406 | GPGGTLGRTASFRIRDIHPHYGRICPIDTSEGINVGLIGSLAIHARIGHWSIESPPFYEISERS--KEVQMVYLSPSRD     |                |                |
| 30_Magnolia            | 406 | GPGGTLGRTASFRIRDIHPHYGRICPIDTSEGINVGLIGSLAIHARIGHWSIESPPFYEISERS--KEVQMVYLSPSRD     |                |                |
| 32_Nymphaea            | 398 | GPGGTLGRTASFRIRDIHPHYGRICPIDTSEGINVGLIGSLAIHARVGDWGSIEPSPFYEISERS--KEEQMVYLSPSRD    |                |                |
| 33_Amborella           | 397 | GPGGTLGRTASFRIRDIHPHYGRICPIDTSEGINVGLIGSLAIHARIGDWSIRSPFYEISERS--KEEQMVYLSPRRD      |                |                |
| 35_Picea               | 401 | GPGGTLGRTASFRIRDIHPHYGRICPIDTSEGMAAGLVAISLSIAHIGQCGLSPFYKISERSRE--EHMVYLLPGE        |                |                |
| 44_Ginkgo              | 405 | GPGGTLTRTASFRIRDIHPHYGRICPIETSEGMAAGLVAISLSIAHIGHCGLSPFHKISEGSKE--EHMVYPSPGE-       |                |                |
| 51_Physcomitrium       | 411 | GPGGVTRRTAGFQVVDIHFHYTRICPIETSEGMAAGLVAISLSIAHANVNNWGFLESPPFYKISKKNVKE--EKIINLSAGED |                |                |

#### βa9:Y485-A499

#### βa10:V529-D590

|                        |     | βb11:V479-L503                                                                    | βb12:I508-V613 |
|------------------------|-----|-----------------------------------------------------------------------------------|----------------|
| <i>T. thermophilus</i> | 492 | --DRYTIAQANTPLEGNRIAAERV-VARRKGEPIVSPPEVEFMDVSPKQVFSVNTNLIPFLEHDDANRALMGSNMQTQA   |                |
| <i>E. coli</i>         | 612 | --GNVYIAQANSNLDEEGHFVEDLVTCRSKGESSLSFRDQVDYMDVSTQQVSVGASLIPFLEHDDANRALMGANMQRQA   |                |
| 0_Nostoc               | 471 | --EDDLRVAPGDIPVDENHGIIGPQVPVRYRQEFSTTTPEQDYVAVSPVQIVSVATPMIPFLEHDDANRALMGSNMQRQA  |                |
| 1_Litchi               | 475 | EYCMV--AAGNSLALSGIQEEQVVPTRYRQEFLLTIAWERVHLRSIFPSQYFSIGASLIPFIEHDDANRALMSSNMQRQA  |                |
| 2_Arabidopsis          | 477 | EYYMI--AAGNSLALNRGIQEEQVVPARYRQEFLLTIAWEVHLRSIFPFQYFSIGASLIPFIEHDDANRALMSSNMQRQA  |                |
| 3_Gossypium            | 475 | EYYMV--AAGNSLALNRGIQEEQVVPARYRQEFLLTIAWEVHLRSIFPFQYFSIGASLIPFIEHDDANRALMSSNMQRQA  |                |
| 5_Ricinus              | 475 | EYHMY--AAGNSLALNRGVQEEQVVPARYRQEFLLTIAWEVHLRSIFPFQYFSIGASLIPFIEHDDANRALMSSNMQRQA  |                |
| 6_Rosa                 | 475 | EYYMI--AAGNSLALNRGIQEEQVVPARYRQEFLLTIEWEQVHLRSIFPFQYFSIGASLIPFIEHDDANRALMSSNMQRQA |                |
| 9_Cucumis              | 493 | EYYMV--ATGNSLALNRGIQEEQVVPARYRQEFLLTIEWEQVHLRSIFPFQYFSIGASLIPFIEHDDANRALMSSNMQRQA |                |
| 11_Nicotiana           | 475 | EYYMV--AAGNSLALNRDIQEEQVVPARYRQEFLLTIAWEVHLRSIFPFQYFSIGASLIPFIEHDDANRALMSSNMQRQA  |                |
| 13_Syringa             | 475 | EYYMV--AAGNSLALNRDIQEEQVVPARYRQEFLLTIAWEVHLRSIFPFQYFSIGASLIPFIEHDDANRALMSSNMQRQA  |                |
| 18_Liquidambar         | 475 | EYYMV--AAGNSLALNRGIQEEQVVPARYRQEFLLTIAWEVHLRSIFPFQYFSIGASLIPFIEHDDANRALMSSNMQRQA  |                |
| 19_Papaver             | 475 | EYYMV--SAGNSLALNRGIQEEQVVPARYRQEFLLTIAWEQIHLRSIFPFQYFSIGASLIPFIEHDDANRALMSSNMQRQA |                |
| 20_Ananas              | 477 | EYYMV--AAGNSLALNRGIQEEQVVPARYRQEFLLTIAWEQIHLRSILPFQYFSIGASLIPFIEHDDANRALMSSNMQRQA |                |
| 28_Liriodendron        | 484 | EYYMV--AAGNSLALNRGVQEEQVVPARYRQEFLLTIAWEQIHLRSIFPFQYFSIGASLIPFIEHDDANRALMSSNMQRQA |                |
| 30_Magnolia            | 484 | EYYMV--AAGNSLALNRGVQEEQVVPARYRQEFLLTIAWEQIHLRSIFPFQYFSIGASLIPFIEHDDANRALMSSNMQRQA |                |
| 32_Nymphaea            | 476 | EYYMV--AAGNSLALNRGIQEEQVVPARYRQEFLLTIAWEQIHLRNIPYFQYFSIGASLIPFIEHDDANRALMSSNMQRQA |                |
| 33_Amborella           | 475 | EYYMVMAAGNSLALNRDIQEEQVVPARYRQEFLLTIAWEQIHLRSIYPLQYFSIGASLIPFIEHDDANRALMSSNMQRQA  |                |
| 35_Picea               | 479 | EDEYRIATGNSLALNRGIQEEQVTPARYRQEFLLTIAWEQIHLRSIFPFQYFSIGASLIPFIEHDDANRALMSSNMQRQA  |                |
| 44_Ginkgo              | 482 | --DEYRIATGNSLALNRGIQEEQVTPARYRQEFLLTIAWEQIHLRSIFPFQYFSIGASLIPFIEHDDANRALMSSNMQRQA |                |
| 51_Physcomitrium       | 489 | --EYRIATGNSLALNRGIQEEQVTPARYRQEFLLTIAWEQIHLRSIYPLQYFSIGASLIPFIEHDDANRALMSSNMQRQA  |                |

|                        |     | βa10:V529-D590                                                                    |                |
|------------------------|-----|-----------------------------------------------------------------------------------|----------------|
|                        |     | βb12:I508-V613                                                                    | βb13:Y623-R808 |
| <i>T. thermophilus</i> | 569 | VPLIRAQAPVMTGLEERVDRDLSLAALYAEEDGEVAKVDGNRIVVRY-ED-----GRLVEYPLRRFFRSNQGTALDQRP   |                |
| <i>E. coli</i>         | 690 | VPTLRADKPLVGTGMEKAVAVDSGVTAVAKRGVQVVDASRIIVIKVNEDEMYPGAEAGIDIYNLTKYTRSNQNTCINQMP  |                |
| 0_Nostoc               | 550 | VPLLKPERPLVGTGLEAQQGARDSGMVVVSRTDGDVTVDATEIRVRPKPN-----TTEIRYPLSKYQRSNQDTCLNQKP   |                |
| 1_Litchi               | 553 | VPLSRSEKICVGTGLERHVALDSGVPAAIDHEGRVLYTDIDKIVLSG--N-----GDTIGIPLVMYQRSNKNTCMHQKT   |                |
| 2_Arabidopsis          | 555 | VPLSRSEKICVGTGLERQVALDSGVPAAIAHEGKIIYTDTEKIVFSG--N-----GDTLSIPLIMYQRSNKNTCMHQKP   |                |
| 3_Gossypium            | 553 | VPLSRSEKICVGTGLERQVALDSGVPAAIDHEGKIISTDTDKIILSG--N-----GDALGIPLVMYQRSNKNTCMHQTA   |                |
| 5_Ricinus              | 553 | VPLSRSEKICVGTGLERQVALDSGVPAAIAEREGKIIYTDIDKIIILSG--N-----GDTLRIPLVMYQRSNKNTCMHQKP |                |
| 6_Rosa                 | 553 | VPLSRSEKICVGTGLERQVALDSGVPAAIAHEGKIIYTDIDKIIILSG--N-----GDTLNIPLVIMYQRSNKNTCMHQKP |                |
| 9_Cucumis              | 571 | VPLSRSEKICVGTGLERQVARDSGVAIAAEHGGKIIYTDIDKIIIFSG--N-----GHTRRIPLMYQRSNKNTCMQKQS   |                |
| 11_Nicotiana           | 553 | VPLSRSEKICVGTGLERQAALDSGALAIAREGRVYNTDKILLAG--N-----GDILSIPLVIMYQRSNKNTCMHQKL     |                |
| 13_Syringa             | 553 | VPLSRPEKICVGTGLERQAALDSGALAIAREGKIIYTDTEKILFSG--N-----GDTLSIPLVMYQRSNKNTCMHQKP    |                |
| 18_Liquidambar         | 553 | VPLSRSEKICVGTGLERQAALDSGIPVLAHEGKIVYTDIDKIIILSG--N-----GDTLSIPLVMYQRSNKNTCMHQKP   |                |
| 19_Papaver             | 553 | VPLSRSEKICVGTGLERQVALDSGVSIAIAHEGKIVVSTDTDKIVFSG--N-----GDTLSIPLVMYQRSNKNTCMHQKS  |                |
| 20_Ananas              | 555 | VPLSRSEKICVGTGLERQVALDSGVLVIAHEGKIIYTDIDKIIILSG--N-----GNTISIPLMYQRSNKNTCMHQKP    |                |
| 28_Liriodendron        | 562 | VPLSRSEKICVGTGLECQAALDSGVAIAHEGKIIYTDIDKIVLSG--N-----GDTLSIPLVMYQRSNKNTCMHQKP     |                |
| 30_Magnolia            | 562 | VPLSRSEKICVGTGLECQAALDSGVAIAHEGKIVSTDTDKIVLSG--N-----GNTISIPLMYQRSNKNTCMHQKP      |                |
| 32_Nymphaea            | 554 | VPLSQSEKICVGTGLERQAALDSGGSIAIAEREGKIIYTDTEKIVLSG--N-----GDTISIPLMYQRSNKNTWMHQKP   |                |
| 33_Amborella           | 555 | VPLSRSEKICVGTGLERQAALDSGSAIAHEGKIIYTDTEKILLSG--N-----GDTISIPLMYQRSNKNTCMHQKP      |                |
| 35_Picea               | 559 | VPLFQPEKCIAGTGLEQAALDSGSAIAIQEGRIEYTDVNIITSSV--N-----GDTVRTLEVIYQRSNTCTCTHQKP     |                |
| 44_Ginkgo              | 561 | IPLFQPEKCIAGTGLEQAALDSGSAIAIQEGRIEYTDVNIITSSV--N-----GDTIGTELVLVYQRSNKNTCMHQKP    |                |
| 51_Physcomitrium       | 567 | VPLIKLEKICVGTGLESQVALDSGNVIMITKQSEKIMYTDGKKISLLN-NT-----NETVNTHLIIYQRSNNSTCIHQKP  |                |

|                        |     | βa11:F665-K716                                                                  |     | β-flap |
|------------------------|-----|---------------------------------------------------------------------------------|-----|--------|
|                        |     | βb13:Y623-R808                                                                  |     |        |
| <i>T. thermophilus</i> | 642 | RVVVQGRVRKGDLLADGPAENGFALGQNVLVAIMPFDDGYNFEDAVIISEELLKRDFYTSIHIEREIEARDTKLGP    | PER |        |
| <i>E. coli</i>         | 770 | CVSLGEPVERGDVLADGPSTDLGELALGQNMRFVAMPWNGYNFEDSILVSEVQEDRFTTIHIQELACVSRDTKLGP    | E   |        |
| 0_Nostoc               | 624 | LVRIGEKVVAGQVLADGSSTEGGELALGQNIIVVAMPWEGYNFEDATLISERLVQDDIYTSIHIEKYEIEARQTKLGP  | E   |        |
| 1_Litchi               | 625 | QVGRGKCIKKGQVLADGAATVGGELALGKNVLVTYMPWEGYNFEDAVLISERLIRYDIYTSFHIQKYEIQTHVTSQGP  | PER |        |
| 2_Arabidopsis          | 627 | QVRGKCIKKGQILADGAATVGGELALGKNVLVAYMPWEGYNFEDAVLISECLVYGDIYTSFHIRKYEIQTHVTSQGP   | PER |        |
| 3_Gossypium            | 625 | RVRGKCIKKGQILADGAATVGGELALGKNVLVAYMPWEGYNFEDAVLISERLVYEDIYTSFHIRKYEIQTHVTSQGP   | PER |        |
| 5_Ricinus              | 625 | QVPRGKCIKKGQVLADGAATVGGELALGKNVLVAYMPWEGYNFEDAVLISERLVYEDIYTSFHIRKYEIQTHVTSQGP  | PER |        |
| 6_Rosa                 | 625 | QVQRGKCIKKGQILADGAATVGGELALGKNVLVAYMPWEGYNSEDVAVLISERLVYEDIYTSFHIRKYEIQTHVTSNGP | PER |        |
| 9_Cucumis              | 643 | QVVRGKCIKKGQILADGAATVGGELALGKNVLVAYMPWEGYNFEDAVLISERLVYEDIYTSFHIRKYEIQTHVTSQGP  | PER |        |
| 11_Nicotiana           | 625 | QVPRGKCIKKGQILADGAATVGGELALGKNVLVAYMPWEGYNSEDVAVLISERLVYEDIYTSFHIRKYEIQTHVTSQGP | PER |        |
| 13_Syringa             | 625 | QVQRGKCIKKGQILADGAATVGGELALGKNVLVAYMPWEGYNFEDAVLISERLVYEDIYTSFHIRKYEIQTHVTSQGP  | PER |        |
| 18_Liquidambar         | 625 | QVQRSKCIKKGQILADGAATVGGELALGKNVLVAYMPWEGYNFEDAVLISERLVYEDIYTSFHIRKYEIQTHVTSQGP  | PER |        |
| 19_Papaver             | 625 | QVVRGKCIKKGQILADGAATVGGELALGKNVLVAYMPWEGYNFEDAVLISERLVYEDIYTSFHIRKYEIQTHVTSQGP  | PER |        |
| 20_Ananas              | 627 | RVRGKCIKKGQILADGAATVGGELALGKNVLVAYMPWEGYNSEDVAVLISERLVYEDIYTSFHIRKYEIQTHVTSQGP  | PER |        |
| 28_Liriodendron        | 634 | QVRGKCIKKGQILADGAATVGGELALGKNVLVAYMPWEGYNSEDVAVLISERLVYEDIYTSFHIRKYEIQTHVTSQGP  | PER |        |
| 30_Magnolia            | 634 | QVRGKCIKKGQILADGAATVGGELALGKNVLVAYMPWEGYNSEDVAVLISERLVYEDIYTSFHIRKYEIQTHVTSQGP  | PER |        |
| 32_Nymphaea            | 626 | QVHRGKYLKKGQILADGAATVGGELALGKNVLVAYMPWEGYNFEDAVLISERLVYEDIYTSFHIRKYEIQTHVTSQGP  | PER |        |
| 33_Amborella           | 627 | QVHRDKYVKKGQVLADGAATVGGELALGKNVLVAHMPWEGYNFEDAVLISERLVYEDIYTSFHIRKYEIQTHVTSQGP  | PER |        |
| 35_Picea               | 631 | QVRQGECKVKGQILADGAATVGGELSLGKNVLVAYMPWEGYNFEDATLISERLVYEDIYTSFHIVRYRIEICMTSQGP  | PER |        |
| 44_Ginkgo              | 633 | RVRQGECKVKGQILADGAATVEGELSPGKNILVAYMPWEGYNFEDATLISERLVYEDIYTSFHIERHGIHRTCMTSQGP | PER |        |
| 51_Physcomitrium       | 640 | QVISKFKLKGQVLTGDAAILKGELTLGKNILVAYMPWEGYNFEDATLISERLVYEDIYTSFHIEREIESRNTNQGP    | PER |        |

|                        |     | Tip                                                                               | Helix          | Tip            |
|------------------------|-----|-----------------------------------------------------------------------------------|----------------|----------------|
|                        |     | β-flap                                                                            |                |                |
|                        |     | βa12:A733-K762                                                                    | βb13:Y623-R808 | βa13:D787-V804 |
| <i>T. thermophilus</i> | 722 | ITRDIPHLSEALRLDDEEGVVRIGAEVKPGDILVGRTSFKG--ESEPTEPERLLRSIFGEKARDVKDTSLRVPPEGGI    |                |                |
| <i>E. coli</i>         | 850 | ITADIPNVGEALSKLDESIVYIGAEVTGGDILVGKVTGK--ETQLTPEEKLRLRAIFGEKARDVKDSSLRVPNGVSGT    |                |                |
| 0_Nostoc               | 704 | ITREIPNVGEDALRLDEQGITRIGAWVEAGDILVGKVTGK--ESDQPEEKLLRAIFGEKARDVRDNSLRVPNGEKGR     |                |                |
| 1_Litchi               | 705 | ITNEIPHLEARLLRNLDQNGIVMLGSWVETGDIIVGKLTPTQAKESSYAPEDRLLRAILGIQVSTSKETCLKLPIGGRGR  |                |                |
| 2_Arabidopsis          | 707 | ITKEIPHLEGRLLRNLDKNGIVMLGSWVETGDIIVGKLTPTQVAKESSYAPEDRLLRAILGIQVSTSKETCLKLPIGGRGR |                |                |
| 3_Gossypium            | 705 | ITNEIPHLEAHLRNLDKNGIVMLGSWVETGDIIVGKLTPTQVAKESSYAPEDRLLRAILGIQVSTSKETCLKLPIGGRGR  |                |                |
| 5_Ricinus              | 705 | ITNEIPHLEAHLRNLDKNGIVMLGSWVETGDIIVGKLTPTQMAKESSYAPEDRLLRAILGIQVSTSKETCLKLPIGGRGR  |                |                |
| 6_Rosa                 | 705 | ITNEIPHLEAHLRNLDKNGIVRLGSWVKTDGDIIVGKLTPTQMAKESSYAPEDRLLRAILGIQVSTSKETCLKLPIGGRGQ |                |                |
| 9_Cucumis              | 723 | ITNEIPHLEARLLCNLDKNGIVMLGSWVETGDIIVGKLTPTQMAKESSYAPEDRLLRAILGIQVSTSKETCLKLPIGGRGR |                |                |
| 11_Nicotiana           | 705 | VTNEIPHLEAHLRNLDKNGIVMLGSWVETGDIIVGKLTPTQVVKESSYAPEDRLLRAILGIQVSTSKETCLKLPIGGRGR  |                |                |
| 13_Syringa             | 705 | ITNEIPHLEAHLRNLDKNGIVMLGSWVETGDIIVGKLTPTQMVKESSYAPEDRLLRAILGIQVSTSKETCLKLPIGGRGR  |                |                |
| 18_Liquidambar         | 705 | ITNEIPHLEAHLRNLDKNGIVMLGSWVETGDIIVGKLTPTQMAKESSYAPEDRLLRAILGIQVSTSKETCLKLPIGGRGR  |                |                |
| 19_Papaver             | 705 | ITNEIPHLEAHLRNLDKNGIVMLGSWVETGDIIVGKLTPTQMTKESSYAPEDRLLRAILGIQVSTAKETCLKLPIGSRGR  |                |                |
| 20_Ananas              | 707 | ITKEIPHLEAHLRNLDKNGIVMLGSWVETGDIIVGKLTPTQTANESSYSPEDRLLRAILGIQVSTAKETCLKLPIGGRGR  |                |                |
| 28_Liriodendron        | 714 | ITNEIPHLEAHLRNLDKNGIVMLGSWVETGDIIVGKLTPTQAKESSYAPEDRLLRAILGIQVSTAKETCLKLPIGGRGR   |                |                |
| 30_Magnolia            | 714 | ITNEIPHLEAHLRNLDKNGIVMLGSWVETGDIIVGKLTPTQAKESSYAPEDRLLRAILGIQVSTAKETCLKLPIGGRGR   |                |                |
| 32_Nymphaea            | 706 | ITNEIPHLEPYLLRNLDKNGIVMLGSWVETGDIIVGKLTPTQAKESSYAPEDRLLRAILGIQVSTAKETCLKLPIGGRGR  |                |                |
| 33_Amborella           | 707 | ITNEIPHLEAHLRNLDKNGIVMLGSWVETGDIIVGKLTPTQAKESSYAPEDRLLRAILGIQVSTAKETCLKLPIGGRGR   |                |                |
| 35_Picea               | 711 | ITREIPHLDAHSRLHLDENGLVMLGSWVETGDIIVGKLTPTQTEESLCAPEGRLLTIFIGIQVSTARVCLRTPIGGRGR   |                |                |
| 44_Ginkgo              | 713 | ITKEIPHLDAHSRLHLDENGLVMLGSWVETGDIIVGKLTPTQKEESLCAPEGRLLTIFIGIQVSTARVCLRTPIGGRGR   |                |                |
| 51_Physcomitrium       | 720 | ITKEIPHLENSVLRHLDKNGVLIPGSWVETGDIIVGKLTPTQTEESLRAPEGRLLTQAFIGIQVTAKETCLKVLNKGGR   |                |                |



|                        |     |                                                                             |               |
|------------------------|-----|-----------------------------------------------------------------------------|---------------|
|                        |     |                                                                             | <b>β-flap</b> |
|                        |     | <b>βa13</b>                                                                 |               |
|                        |     | <b>βb13</b>                                                                 |               |
| <i>T. thermophilus</i> | 800 | VVRTVRLRR-----                                                              |               |
| <i>E. coli</i>         | 928 | VIDVQVTRDGVKDKRALEIEEMQLKQAKDLSEELQILEAGLFSRIRAVLVAGGVAEKLDKLPDRWLLEGLTDEEK |               |
| 0_Nostoc               | 782 | VVDV-RLFT-----                                                              |               |
| 1_Litchi               | 785 | VIDV-RWVQ-----                                                              |               |
| 2_Arabidopsis          | 787 | VIDV-RWVQ-----                                                              |               |
| 3_Gossypium            | 785 | VIDV-RWVQ-----                                                              |               |
| 5_Ricinus              | 785 | VIDV-RWVQ-----                                                              |               |
| 6_Rosa                 | 785 | VIDV-RWVQ-----                                                              |               |
| 9_Cucumis              | 803 | VIDV-RWVQ-----                                                              |               |
| 11_Nicotiana           | 785 | VIDV-RWVQ-----                                                              |               |
| 13_Syringa             | 785 | VIDV-RWVQ-----                                                              |               |
| 18_Liquidambar         | 785 | VIDV-RWVQ-----                                                              |               |
| 19_Papaver             | 785 | VIDV-RWVQ-----                                                              |               |
| 20_Ananas              | 787 | VIDV-RWVQ-----                                                              |               |
| 28_Liriodendron        | 794 | VIDV-RWVQ-----                                                              |               |
| 30_Magnolia            | 794 | VIDV-RWVQ-----                                                              |               |
| 32_Nymphaea            | 786 | VIDV-RWVQ-----                                                              |               |
| 33_Amborella           | 787 | VIDV-RWVQ-----                                                              |               |
| 35_Picea               | 791 | VIDV-RWVQ-----                                                              |               |
| 44_Ginkgo              | 793 | VIDV-RWVQ-----                                                              |               |
| 51_Physcomitrium       | 800 | VIDV-RWVQ-----                                                              |               |

|                        |      |                                                                                 |                       |
|------------------------|------|---------------------------------------------------------------------------------|-----------------------|
|                        |      |                                                                                 | <b>β-flap</b>         |
|                        |      |                                                                                 | <b>βa14:V823-G894</b> |
|                        |      |                                                                                 | <b>βb14:L815-G894</b> |
| <i>T. thermophilus</i> | 809  | -----GDPGVELKPGVREVVRYVAQKRKLQVGDKLANRHGNGGVAAKILPVEDMPH                        |                       |
| <i>E. coli</i>         | 1008 | QNQLEQLAEQYDELKHEFEKKLEAKRRKITQGGDLAPGVLKIVKVYLAVKRRIQPGDKMAGRHNKGVISKINPIEDMPY |                       |
| 0_Nostoc               | 790  | -----REQGDELPPGANMVRVVAQKRKIQVGDKAGRHNKGIISRIIPAEADMPY                          |                       |
| 1_Litchi               | 793  | -----KKGSSY--NPETIRVYISQKREIKVGDKVAGRHNKGIISKILPRQDMPY                          |                       |
| 2_Arabidopsis          | 795  | -----KKGSSY--NPETIRVYISQKREIKVGDKVAGRHNKGIISKILPRQDMPY                          |                       |
| 3_Gossypium            | 793  | -----KKGSSY--NPETIRVYISQKREIKVGDKVAGRHNKGIISKILPRQDMPY                          |                       |
| 5_Ricinus              | 793  | -----KKGSSY--NPETIRVYISQKREIKVGDKVAGRHNKGIISKILPRQDMPY                          |                       |
| 6_Rosa                 | 793  | -----KKGSSY--NPETIRVYISQKREIKVGDKVAGRHNKGIISKILPRQDMPY                          |                       |
| 9_Cucumis              | 811  | -----KKGSSY--NPETIRVYISQKREIKVGDKVAGRHNKGIISKILPRQDMPY                          |                       |
| 11_Nicotiana           | 793  | -----KKGSSY--NPETIRVYISQKREIKVGDKVAGRHNKGIISKILPRQDMPY                          |                       |
| 13_Syringa             | 793  | -----KKGSSY--NPETIRVYISQKREIKVGDKVAGRHNKGIISKILPRQDMPY                          |                       |
| 18_Liquidambar         | 793  | -----KKGSSY--NPETIRVYISQKREIKVGDKVAGRHNKGIISKILPRQDMPY                          |                       |
| 19_Papaver             | 793  | -----KKGSSY--NPETIRVYISQKREIKVGDKVAGRHNKGIISKILPRQDMPY                          |                       |
| 20_Ananas              | 795  | -----KKGSSY--NPETIRVYISQKREIKVGDKVAGRHNKGIISKILPRQDMPY                          |                       |
| 28_Liriodendron        | 802  | -----KKGSSY--NPETIRVYISQKREIKVGDKVAGRHNKGIISKILPRQDMPY                          |                       |
| 30_Magnolia            | 802  | -----KKGSSY--NPETIRVYISQKREIKVGDKVAGRHNKGIISKILPRQDMPY                          |                       |
| 32_Nymphaea            | 794  | -----KKGSSY--NPETIRVYISQKREIKVGDKVAGRHNKGIISKILPRQDMPY                          |                       |
| 33_Amborella           | 795  | -----KKGSSY--NPETIRVYISQKREIKVGDKVAGRHNKGIISKILPRQDMPY                          |                       |
| 35_Picea               | 799  | -----KKGSSY--NPETIRVYISQKREIKVGDKVAGRHNKGIISKILPRQDMPY                          |                       |
| 44_Ginkgo              | 801  | -----KKGSSY--NPETIRVYISQKREIKVGDKVAGRHNKGIISKILPRQDMPY                          |                       |
| 51_Physcomitrium       | 808  | -----KKGSSY--NPETIRVYISQKREIKVGDKVAGRHNKGIISKILPRQDMPY                          |                       |

|                        |      |                                                                                    |                               |
|------------------------|------|------------------------------------------------------------------------------------|-------------------------------|
|                        |      |                                                                                    | <b>βa14:V823-G894</b>         |
|                        |      | <b>βb14:L815-G894</b>                                                              | <b>βb15:R900-D907 (T. Th)</b> |
| <i>T. thermophilus</i> | 861  | LPDGTVPDVLNPLGVPSRMNLGQILETHLGLAGYFLGQRYISPIFDGAKPEIKELLAQAFEVYFGKRKGEGFGVDKRE     |                               |
| <i>E. coli</i>         | 1088 | DENGTPVDIVLNPLGVPSRMNLGQILETHLGLMAAGKIGDKINAMLKQQQEVAKLREFIQRAYDLGADVQRKVLDLST-FSD |                               |
| 0_Nostoc               | 842  | LPDGTSPVDIVLNPLGVPSRMNLGQIFECSLGLAGGLNRRHYRIAPFDERYEQEASRKLVS-ELYE                 |                               |
| 1_Litchi               | 842  | LQDGRPVDMLVFNPLGVPSRMNLGQIFECSLGLAGGLNRRHYRIAPFDERYEQEASRKLVS-ELYE                 |                               |
| 2_Arabidopsis          | 844  | LQDGRPVDMLVFNPLGVPSRMNLGQIFECSLGLAGGLNRRHYRIAPFDERYEQEASRKLVS-ELYE                 |                               |
| 3_Gossypium            | 842  | LQDGRPVDMLVFNPLGVPSRMNLGQIFECSLGLAGGLNRRHYRIAPFDERYEQEASRKLVS-ELYE                 |                               |
| 5_Ricinus              | 842  | LQDGRPVDMLVFNPLGVPSRMNLGQIFECSLGLAGGLNRRHYRIAPFDERYEQEASRKLVS-ELYE                 |                               |
| 6_Rosa                 | 842  | LQDGRPVDMLVFNPLGVPSRMNLGQIFECSLGLAGGLNRRHYRIAPFDERYEQEASRKLVS-ELYE                 |                               |
| 9_Cucumis              | 860  | LQDGRPVDMLVFNPLGVPSRMNLGQIFECSLGLAGGLNRRHYRIAPFDERYEQEASRKLVS-ELYE                 |                               |
| 11_Nicotiana           | 842  | LQDGRPVDMLVFNPLGVPSRMNLGQIFECSLGLAGGLNRRHYRIAPFDERYEQEASRKLVS-ELYE                 |                               |
| 13_Syringa             | 842  | LQDGRPVDMLVFNPLGVPSRMNLGQIFECSLGLAGGLNRRHYRIAPFDERYEQEASRKLVS-ELYE                 |                               |
| 18_Liquidambar         | 842  | VQDGRPVDMLVFNPLGVPSRMNLGQIFECSLGLAGGLNRRHYRIAPFDERYEQEASRKLVS-ELYE                 |                               |
| 19_Papaver             | 842  | LQDGTVPDMLVFNPLGVPSRMNLGQIFECSLGLAGGLNRRHYRIAPFDERYEQEASRKLVS-ELYE                 |                               |
| 20_Ananas              | 844  | LQDGTVPDMLVFNPLGVPSRMNLGQIFECSLGLAGGLNRRHYRIAPFDERYEQEASRKLVS-ELYE                 |                               |
| 28_Liriodendron        | 851  | LQDGTVPDMLVFNPLGVPSRMNLGQIFECSLGLAGGLNRRHYRIAPFDERYEQEASRKLVS-ELYS                 |                               |
| 30_Magnolia            | 851  | LQDGTVPDMLVFNPLGVPSRMNLGQIFECSLGLAGGLNRRHYRIAPFDERYEQEASRKLVS-ELYS                 |                               |
| 32_Nymphaea            | 843  | LQDGTVPDMLVFNPLGVPSRMNLGQIFECSLGLAGGLNRRHYRIAPFDERYEQEASRKLVS-ELYE                 |                               |
| 33_Amborella           | 844  | LQDGTVPDMLVFNPLGVPSRMNLGQIFECSLGLAGGLNRRHYRIAPFDERYEQEASRKLVS-ELYE                 |                               |
| 35_Picea               | 848  | LQDGTVPDMLVFNPLGVPSRMNLGQIFECPLGLAGNSMKNHYRITPFDERYEREASRKLVS-ELYK                 |                               |
| 44_Ginkgo              | 850  | SQDGTVPDMLVFNPLGVPSRMNLGQIFECPLGLAGNSMKNHYRITPFDERYEREASRKLVS-ELYR                 |                               |
| 51_Physcomitrium       | 857  | LQDGTVPDMLVFNPLGVPSRMNLGQIFECPLGLAGYFLGKHYRITPFDERYEREASRKLVS-ELYK                 |                               |

|                        |      | βa15:G970-I1071                                                                |  |
|------------------------|------|--------------------------------------------------------------------------------|--|
|                        |      | βb16:G970-Q1100                                                                |  |
|                        |      | βb15:P1181-D1188 ( <i>E. coli</i> )                                            |  |
| <i>T. thermophilus</i> | 941  | VEVLRRAEKLGLV-----TPGKTPEEQKLKELFLQGVVLYDGRTEGPIEGPIVVGQMFIMKLYHMYVEDKMHAR     |  |
| <i>E. coli</i>         | 1167 | EEVMRLAENLRKGMPIATPVFDGAKEAEIKELLKLDLPTSQGIQLYDGRTEGQFERPVTVGMYMLKLNHLVDDKMHAR |  |
| 0_Nostoc               | 907  | -----ARDETSDKDWVYNDDPGKIMLFDGRTEGAEDRPITVGAVAYMLKLVHLVDDKIHAR                  |  |
| 1_Litchi               | 907  | -----AGKQTANPWIFEPEYPGKSRIFDGRTGDPFEPVPIIGKPYILKLIHQVDDKIHGR                   |  |
| 2_Arabidopsis          | 909  | -----ASKQTANPWIFEPEYPGKSRIFDGRTGDPFEPVPIIGKPYILKLIHQVDDKIHGR                   |  |
| 3_Gossypium            | 907  | -----ASKQTANPWIFEPEYPGKSRIFDGRTGDPFEPVPIIGKPYILKLIHQVDDKIHGR                   |  |
| 5_Ricinus              | 907  | -----ASKQTANPWIFEPEYPGKSRIFDGRTGDPFEPVPIIGKPYILKLIHQVDDKIHGR                   |  |
| 6_Rosa                 | 907  | -----ASKQTANPWIFEPEYPGKSRIFDGRTGDPFEPVPIIGKPYILKLIHQVDDKIHGR                   |  |
| 9_Cucumis              | 925  | -----ASKQTANPWIFEPEYPGKSRIFDGRTGDPFEPVPIIGKPYILKLIHQVDDKIHGR                   |  |
| 11_Nicotiana           | 907  | -----ASKQTANPWIFEPEYPGKSRIFDGRTGDPFEPVPIIGKPYILKLIHQVDDKIHGR                   |  |
| 13_Syringa             | 907  | -----ASKQTANPWIFEPEYPGKSRIFDGRSGNPFEPVPIIGKPYILKLIHQVDDKIHGR                   |  |
| 18_Liquidambar         | 907  | -----ASKQTANPWIFEPEYPGKSRIFDGRTGDPFEPVPIIGKPYILKLIHQVDDKIHGR                   |  |
| 19_Papaver             | 907  | -----ASKQTANPWIFEPEYPGKSRIFDGRTGDPFEPVPIIGKPYILKLIHQVDDKIHGR                   |  |
| 20_Ananas              | 909  | -----ASKQTANPWIFEPEYPGKSRIFDGRTGDPFEPVPIIGKPYILKLIHQVDDKIHGR                   |  |
| 28_Liriodendron        | 916  | -----ASKQTANPWIFEPEYPGKSRIFDGRTGDPFEPVPIIGKPYILKLIHQVDDKIHGR                   |  |
| 30_Magnolia            | 916  | -----ASKQTANPWIFEPEYPGKSRIFDGRTGDPFEPVPIIGKPYILKLIHQVDDKIHGR                   |  |
| 32_Nymphaea            | 908  | -----ASKQTANPWIFEPEYPGKSRIFDGRTGDPFEPVPIIGKPYILKLIHQVDDKIHGR                   |  |
| 33_Amborella           | 909  | -----ASKRTANPWIFEPEYPGKSRIFDGRTGDPFEPVPIIGKPYILKLIHQVDDKIHGR                   |  |
| 35_Picea               | 913  | -----ASEQTANPWIFEPEYDHPGKHRLIDGRGTVFEQPVITIGKAYMSKLSHQVDDKIHAR                 |  |
| 44_Ginkgo              | 915  | -----ASEQTANPWIFEPEYDHPGKNRLIDGRGTVFEQPVITIGKAYIPKLIHQVDDKIHAR                 |  |
| 51_Physcomitrium       | 922  | -----ASKKTNLWLFEPENPGKSRLLNGRTGIEFEQAVTVGKAYMLKLIHQVDDKIHAR                    |  |

|                        |      | Switch-3                                                                        |  | Clamp            |  |
|------------------------|------|---------------------------------------------------------------------------------|--|------------------|--|
|                        |      | βa15:G970-I1071                                                                 |  | βa16:S1080-L1097 |  |
|                        |      | βb16:G970-Q1100                                                                 |  |                  |  |
| <i>T. thermophilus</i> | 1009 | STGPYSLVTQPLGGAQFGGQRFGEVWALEAYGAAHTLQEMLTLSKDDIEGRNAAVEATIKGEDVPEPS-VPESEFRV   |  |                  |  |
| <i>E. coli</i>         | 1247 | STGSYSLVTQPLGGAQFGGQRFGEVWALEAYGAAHTLQEMLTLSKDDVNGRTKMYKNIIVDGNHQMPEG-MPESEFNV  |  |                  |  |
| 0_Nostoc               | 962  | STGPYSLVTQPLGGAQFGGQRFGEVWALEAFGAAHTLQELLTVKSDDMQGRNEALNAIVKGKAIIRPG-TPESFKV    |  |                  |  |
| 1_Litchi               | 962  | SSGHYALVTQPLRGRSKQGGQRFGEVWALEGFGVAHILQEMLTYSKSDHIRARQEVLTGTIIIGGTIPKPEDAPESFRL |  |                  |  |
| 2_Arabidopsis          | 964  | SSGHYALVTQPLRGRSKQGGQRFGEVWALEGFGVAHILQEMLTYSKSDHIRARQEVLTGTIIIGGTIPKPEDAPESFRL |  |                  |  |
| 3_Gossypium            | 962  | SSGHYALVTQPLRGRSKQGGQRFGEVWALEGFGVAHILQEMLTYSKSDHIRARQEVLTGTIIIGGTIPKPEDAPESFRL |  |                  |  |
| 5_Ricinus              | 962  | SSGHYALVTQPLRGRSKQGGQRFGEVWALEGFGVSHILQEMLTYSKSDHIRARQEVLTGTIIIGGTIPKPEDAPESFRL |  |                  |  |
| 6_Rosa                 | 962  | SSGHYALVTQPLRGRSKQGGQRFGEVWALEGFGVAHILQEMLTYSKSDHIRARQEVLTGTIIIGGTIPKPEDAPESFRL |  |                  |  |
| 9_Cucumis              | 980  | SSGHYALVTQPLRGRSKQGGQRFGEVWALEGFGVAHILQEMLTYSKSDHIRARQEVLTGTIIIGGTIPKPEDTPESFRL |  |                  |  |
| 11_Nicotiana           | 962  | SSGHYALVTQPLRGRSKQGGQRFGEVWALEGFGVAHILQEMLTYSKSDHIRARQEVLTGTIIIGGTIPNPEDAPESFRL |  |                  |  |
| 13_Syringa             | 962  | SSGHYALVTQPLRGRSKQGGQRFGEVWALEGFGVAHILQEMLTYSKSDHIRARQEVLTGTIIIGGTIPNPEDAPESFRL |  |                  |  |
| 18_Liquidambar         | 962  | SSGHYALVTQPLRGRSKQGGQRFGEVWALEGFGVAHILQEMLTYSKSDHIRARQEVLTGTIIIGGTIPNPEDAPESFRL |  |                  |  |
| 19_Papaver             | 962  | SSGHYALVTQPLRGRSKQGGQRFGEVWALEGFGVAHILQEMLTYSKSDHIRARQEVLTGTIIIGGTIPKPEDAPESFRL |  |                  |  |
| 20_Ananas              | 964  | SSGHYALVTQPLRGRSKQGGQRFGEVWALEGFGVAHILQEMLTYSKSDHIRARQEVLTGTIIIGGRVNPEDAPESFRL  |  |                  |  |
| 28_Liriodendron        | 971  | SSGHYALVTQPLRGRSKQGGQRFGEVWALEGFGVAHISQEMLTYSKSDHIRARQEVLTGTIIIGGTIPNPEDAPESFRL |  |                  |  |
| 30_Magnolia            | 971  | SSGHYALVTQPLRGRSKQGGQRFGEVWALEGFGVAHISQEMLTYSKSDHIRARQEVLTGTIIIGGTIPNPEDAPESFRL |  |                  |  |
| 32_Nymphaea            | 963  | SSGHYALVTQPLRGRSKQGGQRFGEVWALEGFGVAHILQEMLTYSKSDHIRARQEVLTGTIIIGGTIPNPEGAPESFRL |  |                  |  |
| 33_Amborella           | 964  | SSGHYALVTQPLRGRSKQGGQRFGEVWALEGFGVAHILQEMLTYSKSDHIRARQELLGTTIVGGTIPKPEGAPESFRL  |  |                  |  |
| 35_Picea               | 968  | SSGPYARVTQPLRGRSKRGGQRFGEVWALEGFGVAYILQEMLTLSKSDHIRTNEVLGAIITGGPIPKPDTAPESFRL   |  |                  |  |
| 44_Ginkgo              | 970  | SSGPYALVTQPLRGRSKRGGQRFGEVWALEGFGVAYISQEMLTLSKSDHIIARHEVLGAIITGEPKPKGTVPESFRL   |  |                  |  |
| 51_Physcomitrium       | 977  | SSGPYALVTQPLRGRSRRGGQRFGEVWALEGFGVAYILQEMLTLSKSDHIIARYEVLGAIITGEPKPKGTAPESFLL   |  |                  |  |

|                        |      | Clamp                                                       |  |
|------------------------|------|-------------------------------------------------------------|--|
|                        |      | βb16:G970-Q1100                                             |  |
| <i>T. thermophilus</i> | 1088 | LVKELQALALDVQTLDE--KDNP-----VDIFEGLASKR-----                |  |
| <i>E. coli</i>         | 1326 | LLKEIRSLGINIELEDE-----                                      |  |
| 0_Nostoc               | 1041 | LMRELQSLGLDIAVHKVETQADGSSLDVEVDLMADQSARRTPPRPTYESLSRESLEDDE |  |
| 1_Litchi               | 1042 | LVRELRLALELNHFLVSEKNFQINR-KEA-----                          |  |
| 2_Arabidopsis          | 1044 | LVRELRLALELNHFLVSEKNFQINR-KEV-----                          |  |
| 3_Gossypium            | 1042 | LVRELRLALELNHFLVSEKNFQINR-KEA-----                          |  |
| 5_Ricinus              | 1042 | LVRELRLALELNHFLVSEKNFQINR-KEA-----                          |  |
| 6_Rosa                 | 1042 | LVRELRLALELNHFLVSEKNFQINR-KEA-----                          |  |
| 9_Cucumis              | 1060 | LVRELRLALELNHFLVSEKNFQINR-KEA-----                          |  |
| 11_Nicotiana           | 1042 | LVRELRLALELNHFLVSEKNFQINR-KEA-----                          |  |
| 13_Syringa             | 1042 | LVRELRLALELNHFLVSEKNFQINR-KEA-----                          |  |
| 18_Liquidambar         | 1042 | LVRELRLALELNHFLVSEKNFQINR-KEA-----                          |  |
| 19_Papaver             | 1042 | LVRELRLALELNHFLVSEKNFQIQR-KEA-----                          |  |
| 20_Ananas              | 1044 | LVRELRLALELNHFLVSEKNFQINR-KEA-----                          |  |
| 28_Liriodendron        | 1051 | LVRELRLALELNHFLVSEKNFQINR-KEA-----                          |  |
| 30_Magnolia            | 1051 | LVRELRLALELNHFLVSEKNFQINR-KEA-----                          |  |
| 32_Nymphaea            | 1043 | LVRELRLSLELNHFLVSEKNFQINR-KEV-----                          |  |
| 33_Amborella           | 1044 | LVRELRLALELKHFLVSEKNFQINR-KEA-----                          |  |
| 35_Picea               | 1048 | LIRELRLALELNHAIISEKDFQIDR-EEV-----                          |  |
| 44_Ginkgo              | 1050 | LVRELRLAPELNHAIISEKDFQIDK-KEV-----                          |  |
| 51_Physcomitrium       | 1057 | LVRELRLSLELDHAVIFEKNLNIKF-KDV-----                          |  |

**Figure S4:** sequence alignment of the  $\beta'$  subunits from PEP of angiosperms with those of the RNAPs from *E. coli*, *T. thermophilus* and Nostoc. The residues conserved more than 50 % are in red, those mutated in similar residues are in blue. The strictly conserved residues described by Lane & Darst (Lane & Darst, 2010) are highlighted in gray. The blue triangles show mutations observed among the strictly conserved residues described (Lane & Darst, 2010). The non-conservative mutations, at least three in a row in the  $\beta$  or  $\beta'$  domain in *E. coli* and *T. thermophilus*, are highlighted in green and displayed on the *E. coli* structure (PDB entry: 6GH5). Those colored in orange are nearby to the DNA, those in green are located at the surface of the subunits. The domains described for all-RNA polymerase (a) and the bRNAPs (b) are also given and highlighted in yellow and cyan respectively. The name of the RNAP domains are also given and highlighted in purple and green (Lane & Darst, 2010; Sutherland & Murakami, 2018).

|                        |   | Clamp                                                                                                                                                                           | Zipper | Clamp          |
|------------------------|---|---------------------------------------------------------------------------------------------------------------------------------------------------------------------------------|--------|----------------|
|                        |   | β' a1: S14-S22                                                                                                                                                                  |        | β' a2: D42-G51 |
|                        |   | β' b1: A13-L135                                                                                                                                                                 |        |                |
| <i>T. thermophilus</i> | 1 | -----MKKEVRK <b>V</b> RIALASPEKIR <b>S</b> WS-----YGEVEK <b>P</b> ETIN <b>Y</b> RT <b>L</b> KPERDGLFDERIFGPIK <b>D</b> YE <b>C</b> A                                            |        |                |
| <i>E. coli</i>         | 1 | MKDLLK <b>F</b> LKAQTKTEEFDA <b>I</b> KIALASPD <b>M</b> IR <b>S</b> WS-----FGEV <b>K</b> K <b>P</b> ETIN <b>Y</b> RT <b>F</b> K <b>P</b> ERDGLFCARIFGPIK <b>D</b> YE <b>C</b> L |        |                |
| 0_Nostoc               | 1 | -----MRPAQTNQFDY <b>V</b> K <b>I</b> GLASPERIR <b>Q</b> WGER <b>T</b> LPNG <b>Q</b> VVGEVTK <b>P</b> ETIN <b>Y</b> RT <b>L</b> KPEMDGLFCERIFGPAK <b>D</b> WE <b>C</b> H         |        |                |
| 1_Litchi               | 1 | -----MI---DRYKHQQLRIGSVSPQQISAWTKILPNGEIVGEVTKPYTFHYKTNKPEKDGLFCERIFGPIK <b>S</b> GICA                                                                                          |        |                |
| 2_Arabidopsis          | 1 | -----MI---DRYKHQQLRIGLVSPQQISAWATKILPNGEIVGEVTKPYTFHYKTNKPEKDGLFCERIFGPIK <b>S</b> GICA                                                                                         |        |                |
| 3_Gossypium            | 1 | -----MI---DRYKHQQLRIGSVSPQQISAWAKILPNGETVGEVTKPYTFHYKTNKPEKDGLFCERIFGPIK <b>S</b> GICA                                                                                          |        |                |
| 5_Ricinus              | 1 | -----MI---DRYKHQQLRIGSVSPQQISAWAKILPNGEIVGEVTKPYTFHYKTNKPEK <b>G</b> GLFCERIFGPIK <b>S</b> GICA                                                                                 |        |                |
| 6_Rosa                 | 1 | MNQNFSSMI---DRYKHQQLRIGLVSPQQISAW <b>Q</b> KILPNGEIVGEVTKPYTFHYKTNKPEKDGLFCERIFGPIK <b>S</b> GICA                                                                               |        |                |
| 9_Cucumis              | 1 | MNQKIFSMI---DRYKHQQLRIGLVSPQQISAWANKILPNGEIVGEVTKPYTFHYKTNKPEKDGLFCERIFGPIK <b>S</b> GICA                                                                                       |        |                |
| 11_Nicotiana           | 1 | MNNNFSSMI---DRYKHQQLRIGSVSPQQISAWATKILPNGEIVGEVTKPYTFHYKTNKPEKDGLFCERIFGPIK <b>S</b> GICA                                                                                       |        |                |
| 13_Syringa             | 1 | MNQNFSSMI---DRYKHQQLRIGLVSPQQISAWATKILPNGEIVGEV <b>I</b> KPYTFHYKTNKPEKDGLFCERIFGPIK <b>S</b> GICA                                                                              |        |                |
| 18_Liquidambar         | 1 | -----MI---DRYKHQQLRIGSVSPQQISAWANKILPNGEIVGEVTKPYTFHYKTNKPEK <b>G</b> GLFCERIFGPIK <b>S</b> GICA                                                                                |        |                |
| 19_Papaver             | 1 | -----MI---DQYKHQHLRIGSVSP <b>E</b> QISAWAKILPNGEV <b>V</b> GEVTKPYTFHYKTNKPEKDGLFCERIFGPIK <b>S</b> GICA                                                                        |        |                |
| 20_Ananas              | 1 | -----MI---DQYKHQQLRIGLVSPQQ <b>I</b> AWANKILPNGEIVGEVTKPYTFHYKTNKPEKDGLFCERIS <b>G</b> PIK <b>S</b> GICA                                                                        |        |                |
| 28_Liriodendron        | 1 | -----MI---DRYKHQQLRIGSVSPQQISAWANKILPNGEIVGEVTKPYTFHYKTNKPEKDGLFCERIFGPIK <b>S</b> GICA                                                                                         |        |                |
| 30_Magnolia            | 1 | -----MI---DRYKHQQLRIGSVSPQQISAWANKILPNGEIVGEVTKPYTFHYKTNKPEKDGLFCERIFGPIK <b>S</b> GICA                                                                                         |        |                |
| 32_Nymphaea            | 1 | MNQNFSSMI---DQYKHQQLRIGLVSP <b>K</b> IRAWANKILPNGEIVGEVTKPYTFHYKTNKPEKDGLFCERIFGPIK <b>S</b> GICA                                                                               |        |                |
| 33_Amborella           | 1 | -----MI---DRYKHQQLRIGLVSP <b>Q</b> QIRAWANKILPNGE <b>M</b> VGEVTKPYTFHYK <b>S</b> NKPEKDGLFCERIFGPIK <b>S</b> GICA                                                              |        |                |
| 35_Picea               | 1 | -----MI---DQNKHQQLRIGLAS <b>P</b> E <b>Q</b> ICAWSEKILPNGEIV <b>Q</b> VTKPYTLHYETNK <b>P</b> ERDGSFCERIFGPIK <b>S</b> RV <b>S</b>                                               |        |                |
| 44_Ginkgo              | 1 | MNRNLSFT <b>I</b> ---ARDKHQQLRIGLAS <b>P</b> E <b>K</b> ICAWSEKILPNGEIV <b>Q</b> VTKPHTSHYK <b>T</b> NEPEKDGLFCERIFGPIK <b>S</b> V <b>C</b> A                                   |        |                |
| 51_Physcomitrium       | 1 | -----MI---HREKYHHLRIRLAS <b>P</b> E <b>Q</b> IR <b>S</b> WAER <b>V</b> LPNGEIV <b>Q</b> VTKPYTLHYK <b>T</b> HKPEKDGLFCERIFGPIK <b>S</b> GICA                                    |        |                |

|                        |    | β' a1-a6; clamp                                                                                                                                                                              |                 |                  |
|------------------------|----|----------------------------------------------------------------------------------------------------------------------------------------------------------------------------------------------|-----------------|------------------|
|                        |    | β' a3: C58-G61                                                                                                                                                                               | β' a4: R89-V105 | β' a5: S110-Y128 |
|                        |    | β' b1: A13-L135                                                                                                                                                                              |                 |                  |
| <i>T. thermophilus</i> | 60 | CGKYKRQR---FEGKVCERCGVE <b>V</b> TSIVRRYRM <b>G</b> HIELATPA <b>A</b> HI <b>F</b> V <b>K</b> D <b>V</b> PSK <b>I</b> GTLLDLSATELE <b>Q</b> VLYFS <b>K</b> YIV <b>L</b> D                     |                 |                  |
| <i>E. coli</i>         | 72 | CGKYKRLK---HRGVICEKCGVE <b>V</b> TQTKVRRER <b>M</b> G <b>H</b> IELAS <b>P</b> TA <b>H</b> I <b>W</b> FLKSLPSR <b>I</b> GLLLD <b>M</b> PLR <b>D</b> IE <b>R</b> VLY <b>F</b> ESYVV <b>I</b> E |                 |                  |
| 0_Nostoc               | 73 | CGKYKRVR---HRGIVCERCGVE <b>V</b> TESRVRHR <b>M</b> G <b>I</b> KLAAPVAHVWY <b>L</b> K <b>G</b> IPSYISILL <b>D</b> MPLR <b>D</b> VE <b>Q</b> IVYFN <b>S</b> YVV <b>L</b> S                     |                 |                  |
| 1_Litchi               | 71 | CGNYRVIGDEKED <b>P</b> QFCEQCGVEFVDSRIRRYQMGYIK <b>L</b> GC <b>P</b> VTHVWY <b>L</b> KRLPSYIANLLD <b>K</b> PLKEGLEGLVYCD----FS                                                               |                 |                  |
| 2_Arabidopsis          | 71 | CGNYRVIGDEKEDPKFCEQCGVEFVDSRIRRYQMGYIK <b>L</b> CPVTHVWY <b>L</b> KRLPSYIANLLD <b>K</b> PLKEGLEGLVYCD----FS                                                                                  |                 |                  |
| 3_Gossypium            | 71 | CGNYRVIGNQ <b>K</b> EGPKFCEQCGVEFVDSRIRRYQMGYI <b>R</b> LACPVTHVWY <b>L</b> KRLPSYIANLLD <b>K</b> PLKEGLEGLVYCD----FS                                                                        |                 |                  |
| 5_Ricinus              | 71 | CGNYRVIRNEKED <b>Q</b> KFCEQCGVEFVDSRIRRYQMGYIKLACPVTHVWY <b>L</b> KRLPSYIANLLD <b>K</b> PLKEGLEGLVYCD----V-                                                                                 |                 |                  |
| 6_Rosa                 | 78 | CGNYRVIGDEK <b>D</b> PKFCEQCGVEFVDSRIRRYQMGYIKLACPVTHVWY <b>L</b> KRLPSYIANLLD <b>K</b> PLKEGLEGLVYCD----FS                                                                                  |                 |                  |
| 9_Cucumis              | 78 | CGNYRVIGDKEDSKFCEQCGVEFVDSRIRRYQMGYIKLACPVTHVWY <b>L</b> KRLPSYIANLLD <b>K</b> PLKEGLEGLVYCD----FS                                                                                           |                 |                  |
| 11_Nicotiana           | 78 | CGNYRVIGDEKEDPKFCEQCGVEFVDSRIRRYQMGYIKLACPVTHVWY <b>L</b> KRLPSYIANLLD <b>K</b> PLKEGLEGLVYCD----FS                                                                                          |                 |                  |
| 13_Syringa             | 78 | CGNYRVIGDEKEDPKFCEQCGVEFVDSRIRRYQMGYIKLACPVTHVWY <b>L</b> KRLPSYIANLLD <b>K</b> PLKEGLEGLVYCD----FS                                                                                          |                 |                  |
| 18_Liquidambar         | 71 | CGNYRVIGDEKEDPKFCEQCGVEFVDSRIRRYQMGYIKLACPVTHVWY <b>L</b> KRLPSYIANLLD <b>K</b> PLKEGLEGLVYCD----FS                                                                                          |                 |                  |
| 19_Papaver             | 71 | CGNYRVIGDEKEDPKFCEQCGVEFVDSRIRRYQMGYIKLACPVTHVWY <b>L</b> KRLPSYIANLLD <b>K</b> PLKEGLEGLVYCD----VS                                                                                          |                 |                  |
| 20_Ananas              | 71 | CGNYRVIRAEKEDPKFCEQCGVEFVDSRIRRYQMGYIKLACPVTHVWY <b>L</b> KRLPSYIANLLD <b>K</b> PLK <b>Q</b> LEGLVYCDVY <b>L</b> DF                                                                          |                 |                  |
| 28_Liriodendron        | 71 | CGNYRVIGNEKEDPKFCEQCGVEFVDSRIRRYQMGYIKLACPVTHVWY <b>L</b> KRLPSYIASLLD <b>K</b> PLKEGLEGLVYCD----FS                                                                                          |                 |                  |
| 30_Magnolia            | 71 | CGNYRVIGNEKEDPKFCEQCGVEFVDSRIRRYQMGYIKLACPVTHVWY <b>L</b> KRLPSYIANLLD <b>K</b> PLKEGLEGLVYCD----FS                                                                                          |                 |                  |
| 32_Nymphaea            | 78 | CGNYRVIGGEKE <b>E</b> PKFCEQCGVESVDSRIRRYQMGYIKLACPVTHVWY <b>L</b> KRLPSYIANLLD <b>K</b> PLKEGLEGLVYCD----FS                                                                                 |                 |                  |
| 33_Amborella           | 71 | CGNYRVIGDEKEDPKFCEQCGVESVDSRIRRYQMGYIKLACPVTHVWY <b>L</b> KRLPSYIANLS <b>D</b> RPLKEGLEGLVYCD----FS                                                                                          |                 |                  |
| 35_Picea               | 71 | CGNSPGIGNEKIDSKFCTQCGVEFVDSRIRRYRMGYIKLACPV <b>A</b> HI <b>W</b> Y <b>L</b> KRLPSYIANLLA <b>K</b> TRKELEGPVYCD <b>L</b> F----                                                                |                 |                  |
| 44_Ginkgo              | 78 | CGNSRVIRNEKEDSKFCEQCGVEFVDSRIRRYRMGYIKLACPV <b>V</b> HVWY <b>S</b> KRLPSYIANLLA <b>K</b> PLKELEGPVYCD <b>L</b> F----                                                                         |                 |                  |
| 51_Physcomitrium       | 71 | CGKY <b>Q</b> IE---KYSKFCEQCGVE <b>F</b> SRVRRYRMGYIKLACPVTHVWY <b>L</b> KRLPSYIANLLA <b>K</b> PLKELES <b>L</b> VYCD <b>L</b> F----                                                          |                 |                  |

|                        |     | Clamp                                                                                                                                                   |
|------------------------|-----|---------------------------------------------------------------------------------------------------------------------------------------------------------|
| <i>T. thermophilus</i> | 137 | PKGA <b>I</b> LNGVPVE <b>K</b> RQLLTDEEYREL <b>R</b> YGKQETYPLPPGV <b>D</b> ALVKDGEEV <b>V</b> K <b>G</b> QELAPGVVSRLDGVALYR <b>F</b> PRRVRVEY <b>V</b> |
| <i>E. coli</i>         | 149 | GGMT-----NLER <b>Q</b> QILTEE <b>Q</b> YLDAL                                                                                                            |
| 0_Nostoc               | 150 | AGNAE---TLTYKQL <b>L</b> SED <b>Q</b> WLE <b>I</b> E                                                                                                    |
| 1_Litchi               | 147 | FARPIAKKPT <b>F</b> LRLR <b>G</b> LF-----E <b>Y</b> -----                                                                                               |
| 2_Arabidopsis          | 147 | FARPI <b>T</b> KKPT <b>F</b> LRLR <b>G</b> SF-----E <b>Y</b> -----                                                                                      |
| 3_Gossypium            | 147 | FARPIAKKPT <b>F</b> LRLR <b>G</b> SF-----E <b>Y</b> -----                                                                                               |
| 5_Ricinus              | 146 |                                                                                                                                                         |
| 6_Rosa                 | 154 | FARPIAKKPT <b>F</b> LRLR <b>G</b> SF-----E <b>Y</b> -----                                                                                               |
| 9_Cucumis              | 154 | FARPIAKKPT <b>F</b> LRLR <b>G</b> SF-----E <b>Y</b> -----                                                                                               |
| 11_Nicotiana           | 154 | FARPI <b>T</b> KKPT <b>F</b> LRLR <b>G</b> LF-----E <b>Y</b> -----                                                                                      |
| 13_Syringa             | 154 | FARPI <b>T</b> KKPT <b>F</b> LRLR <b>G</b> LF-----E <b>Y</b> -----                                                                                      |
| 18_Liquidambar         | 147 | FARPIAKKPT <b>F</b> LRLR <b>G</b> SF-----E <b>Y</b> -----                                                                                               |
| 19_Papaver             | 147 | FAR <b>T</b> VAKKPT <b>F</b> LRLR <b>G</b> SF-----E <b>Y</b> -----                                                                                      |
| 20_Ananas              | 151 | FARPIAKKPT <b>F</b> LRLR <b>G</b> SF-----E <b>Y</b> -----                                                                                               |
| 28_Liriodendron        | 147 | FARPIAKKPT <b>F</b> LRLR <b>G</b> SF-----E <b>S</b> -----                                                                                               |
| 30_Magnolia            | 147 | FARPIAKKPT <b>F</b> LRLR <b>G</b> SF-----E <b>S</b> -----                                                                                               |
| 32_Nymphaea            | 154 | FARPIAKKPT <b>F</b> LRLR <b>G</b> SF-----E <b>Y</b> -----                                                                                               |
| 33_Amborella           | 147 | FARPIAKKPT <b>F</b> LRLR <b>G</b> SF-----E <b>Y</b> -----                                                                                               |
| 35_Picea               | 147 | IARPIAN <b>K</b> PT <b>L</b> LSR <b>G</b> T <b>F</b> -----N <b>Y</b> -----                                                                              |
| 44_Ginkgo              | 154 | IARPIAN <b>K</b> PT <b>L</b> LSR <b>G</b> T <b>F</b> -----K <b>Y</b> -----                                                                              |
| 51_Physcomitrium       | 144 | LARPI <b>S</b> K <b>P</b> IT <b>L</b> LRLR <b>G</b> LF-----K <b>Y</b> -----                                                                             |



|                        |     |                                                                                  |
|------------------------|-----|----------------------------------------------------------------------------------|
| <i>T. thermophilus</i> | 217 | KKERAGRLRLPLAAWVEKEAYKPGELAEPEPYLFRAEEEGVVVELKELEEGAFVLRLREDEPVATYFLPVGMTPLVVHGE |
| <i>E. coli</i>         | 170 | -----                                                                            |
| 0_Nostoc               | 172 | -----                                                                            |
| 1_Litchi               | 167 | -----EIQSWKYSI-----PLFFTT-----QGFD-----                                          |
| 2_Arabidopsis          | 167 | -----EIQSWKYSI-----PLFFTT-----QGFD-----                                          |
| 3_Gossypium            | 167 | -----EIQSWKYSI-----PLFFTT-----QGFD-----                                          |
| 5_Ricinus              | 146 | -----KYSI-----PLFFTA-----QGFD-----                                               |
| 6_Rosa                 | 174 | -----EIQSWKYSI-----PLFFTT-----PGFD-----                                          |
| 9_Cucumis              | 174 | -----EIQSWKYSI-----PLFFTT-----QGFD-----                                          |
| 11_Nicotiana           | 174 | -----EIQSWKYSI-----PLFFTT-----QGFD-----                                          |
| 13_Syringa             | 174 | -----EIQSWKYSI-----PLFFTT-----QGFD-----                                          |
| 18_Liquidambar         | 167 | -----EIQSWKYSI-----PLFFTT-----QGFD-----                                          |
| 19_Papaver             | 167 | -----EIQSWKYSI-----PLFFTT-----QGFD-----                                          |
| 20_Ananas              | 171 | -----EIQSRNYSI-----PLFFTT-----SGFE-----                                          |
| 28_Liriodendron        | 167 | -----EIQSRKYSI-----PLFFTT-----QDFD-----                                          |
| 30_Magnolia            | 167 | -----EIQSRKYSI-----PLFFTT-----QGFD-----                                          |
| 32_Nymphaea            | 174 | -----EIQSRKYSI-----PLFFTT-----QGFD-----                                          |
| 33_Amborella           | 167 | -----EIQSRKYSI-----PLFFTT-----QCFN-----                                          |
| 35_Picea               | 167 | -----EIQSWRDI-----PHYLSAR-----SHYLFARSG-----                                     |
| 44_Ginkgo              | 174 | -----DIQSWGDIL-----PHYLSA-----QGF-----                                           |
| 51_Physcomitrium       | 164 | -----EDQSWREIF-----PRYFSS-----RGFE-----                                          |

|                        |     |                                                                                 |
|------------------------|-----|---------------------------------------------------------------------------------|
| <i>T. thermophilus</i> | 297 | IVEKGQPLAEAKGLLRMPRQVRAAQVEAEEGETVYLTFLFLEWTEPKDYRVQPHMNVVPEGARVEAGDKIVAAIDPEEE |
| <i>E. coli</i>         | 170 | -----EE                                                                         |
| 0_Nostoc               | 172 | -----DQ                                                                         |
| 1_Litchi               | 186 | -----                                                                           |
| 2_Arabidopsis          | 186 | -----                                                                           |
| 3_Gossypium            | 186 | -----                                                                           |
| 5_Ricinus              | 160 | -----                                                                           |
| 6_Rosa                 | 193 | -----                                                                           |
| 9_Cucumis              | 193 | -----                                                                           |
| 11_Nicotiana           | 193 | -----                                                                           |
| 13_Syringa             | 193 | -----                                                                           |
| 18_Liquidambar         | 186 | -----                                                                           |
| 19_Papaver             | 186 | -----                                                                           |
| 20_Ananas              | 190 | -----                                                                           |
| 28_Liriodendron        | 186 | -----                                                                           |
| 30_Magnolia            | 186 | -----                                                                           |
| 32_Nymphaea            | 193 | -----                                                                           |
| 33_Amborella           | 186 | -----                                                                           |
| 35_Picea               | 193 | -----                                                                           |
| 44_Ginkgo              | 193 | -----                                                                           |
| 51_Physcomitrium       | 183 | -----                                                                           |

|                        |     |                                                                                 |
|------------------------|-----|---------------------------------------------------------------------------------|
| <i>T. thermophilus</i> | 377 | VIAEAEVVLHPEPASILVVKARVYPFEDDVEVSTGDRVAPGDVLADGGKVKSDVYGRVEVDLVRNVVRVVESYDIDARM |
| <i>E. coli</i>         | 172 | -----F-----GDEFDAKM                                                             |
| 0_Nostoc               | 174 | -----IYS-E-----DSVLQGVVGI                                                       |
| 1_Litchi               | 186 | -----TFR-----NREIST                                                             |
| 2_Arabidopsis          | 186 | -----IFR-----NREIST                                                             |
| 3_Gossypium            | 186 | -----TFR-----SREIST                                                             |
| 5_Ricinus              | 160 | -----TFR-----NREIST                                                             |
| 6_Rosa                 | 193 | -----TFR-----NREIST                                                             |
| 9_Cucumis              | 193 | -----TFR-----NREIST                                                             |
| 11_Nicotiana           | 193 | -----TFR-----NREIST                                                             |
| 13_Syringa             | 193 | -----TFR-----NREIST                                                             |
| 18_Liquidambar         | 186 | -----TFR-----NREIST                                                             |
| 19_Papaver             | 186 | -----TFR-----NREIST                                                             |
| 20_Ananas              | 190 | -----TFR-----NREIST                                                             |
| 28_Liriodendron        | 186 | -----TFR-----NREIST                                                             |
| 30_Magnolia            | 186 | -----TFR-----NREIST                                                             |
| 32_Nymphaea            | 193 | -----TFR-----NREIST                                                             |
| 33_Amborella           | 186 | -----LFR-----NREIST                                                             |
| 35_Picea               | 193 | -----TFQ-----EREIAT                                                             |
| 44_Ginkgo              | 193 | -----AFQ-----NREIAT                                                             |
| 51_Physcomitrium       | 183 | -----AFQ-----NKEIAT                                                             |

|                         |     | Clamp                              |                                              |  | Clamp          |
|-------------------------|-----|------------------------------------|----------------------------------------------|--|----------------|
|                         |     | β'a6:G457-L470                     |                                              |  | β'a7:R500-F502 |
|                         |     | β'b2:A454-M481                     |                                              |  | β'b3:K494-S596 |
| <i>T. thermophilus</i>  | 457 | GAEATQQLKELDLE-----                | ALEKELLEMKHP-SRARRAKARKLELVVRAFLDSGNRPEWMI   |  |                |
| <i>E. coli</i>          | 181 | GAEATQALLKSMDE-----                | QECQLREELNSETKRRKLTKRKLEAFVQS GNKPEWMI       |  |                |
| <i>0_Nostoc</i>         | 189 | GAEALLRLADINLE-----                | QEAESLREIIGNAKG-QKRAKLIKRLVIDNFIATGSKPEWMV   |  |                |
| <i>1_Litchi</i>         | 195 | GAVAIREQADLDLQIIDIYSLVDWKELG-----  | EEGP-TGNEWEDRKIGRRDFLVRRIELAKHFIRTNIEPEWMV   |  |                |
| <i>2_Arabidopsis</i>    | 195 | GAGAIREQADLDLRIIENSLVEWQELG-----   | EEGP-TGNEWEDRKIVRRKDFLVRRMELAKHFIRTNIEPEWMV  |  |                |
| <i>3_Gossypium</i>      | 195 | GAGAIREQADLDLRLIIDYSLVEWKELG-----  | EEGL-TGNEWEDRKIGRRKDFLVRRMELAKHFIRTNIEPEWMV  |  |                |
| <i>5_Ricinus</i>        | 169 | GAGAIREQADLDLRIIIDSVEWKELG-----    | EEGP-TGNEWEDRKVGRRKDFLVRRV ELAKHFIRTNIEPEWMV |  |                |
| <i>6_Rosa</i>           | 202 | GAGAIREQADLDLRIIIDSLEWKELG-----    | EEGS-TGNEWEDRKVGRRKDFLVRRMELAKHFIRTNIEPEWMV  |  |                |
| <i>9_Cucumis</i>        | 202 | GAGAIREQADLDLRLIIDYSLVEWKELG-----  | EEGP-ACNEWEDRKVGRRKDFLVRRMELAKHFIRTNIEPEWMV  |  |                |
| <i>11_Nicotiana</i>     | 202 | GAGAIREQADLDLRIIENSLVEWEELG-----   | EEGH-TGNEWEDRKVGRRKDFLVRRV ELAKHFIRTNIEPEWMV |  |                |
| <i>13_Syringa</i>       | 202 | GAGAIREQADLDLRIILDNSLVEWKELG-----  | EEGP-TGNEWEDRKVGRRKDFLVRRMELAKHFIRTNIEPEWMV  |  |                |
| <i>18_Liquidambar</i>   | 195 | GAGAIREQADLDLRIIIDSVEWKELG-----    | EEGS-AGNEWEDRKIGRRKDFLVRRMELAKHFIRTNIEPEWMV  |  |                |
| <i>19_Papaver</i>       | 195 | GASAIREQADLDLRLIIDCSLVEWKELG-----  | EEGP-TGNEWEDRKIGRRKDFLVRRMELAKHFIRTNVEAEWMV  |  |                |
| <i>20_Ananas</i>        | 199 | GAGAIREQADSDLRIIDNSLVEWKELG-----   | DEGS-TGNEWEDRKIGRRKDFLVRRMELAKHFIRTNVEPEWMV  |  |                |
| <i>28_Liriodendron</i>  | 195 | GAGAIKEQADPDRLRIITDHSLEWKELG-----  | EEGSADGNEWEDRKIGRRKDFLVRRMELAKHFIRTNVEPERMV  |  |                |
| <i>30_Magnolia</i>      | 195 | GAGAIREQADPDRLRIITDHSLEWKELG-----  | EEGSADGNEWEDRKIGRRKDFLVRRV ELAKHFIRTNVEPERMV |  |                |
| <i>32_Nymphaea</i>      | 202 | GATAIREQLADLDLRIIDRSLVEWKELG-----  | EEGS-TGNDWEDRKIGRRKDFLVRRMELAKHFIRTNVEPEWMV  |  |                |
| <i>33_Amborella</i>     | 195 | GAGAIREQADPDRLRIITDRSLVEWKELG----- | EERS-AENEWEDKIVRRKDFLVRRMELAKHFIRTNVEPERMV   |  |                |
| <i>35_Picea</i>         | 202 | GGDAIREQLTGDLQIIDRSHMEWKNLVELKWNRL | EDQESTVDGWEDETIRRRKDFLVGRMKLAKHFIRTNIEPKWMV  |  |                |
| <i>44_Ginkgo</i>        | 202 | GGDAIREQLAGPDRLIMANSYMEWKILE-----  | EQKSTGNEWEDKIQRRKDFSVRRMELAKHFIRTNIEPEWMV    |  |                |
| <i>51_Physcomitrium</i> | 192 | GGDAIKKQLSNLDLQGVLDYAYIEWKELV----- | EQKSTGNEWEDRKIQRRKDLLVRRIKLAKQFLQTNIKPEWMV   |  |                |

|                         |     | Lid                                                                            | β'coiled-coil region (ccr)      |                 | Rudder |
|-------------------------|-----|--------------------------------------------------------------------------------|---------------------------------|-----------------|--------|
| Clamp                   |     |                                                                                |                                 |                 |        |
|                         |     | β'a8:P509-V530                                                                 | β'a9:T537-L554                  | β'a10:K571-D583 |        |
| β'b3: K494-S596         |     |                                                                                |                                 |                 |        |
| <i>T. thermophilus</i>  | 514 | LEAVPVLPPDLRPMVQVDGGRFAT-SDLNDLYRRLINRNNRLKKLLAQG--                            | -APEIIRNEKRMQLQEAVDALLDNGRRGAP  |                 |        |
| <i>E. coli</i>          | 239 | LTVLPVLPPDLRPLVPLDGGRFAT-SDLNDLYRRVINRNNRLKRLDLA--                             | -APDIIVRNEKRMQLQEAVDALLDNGRRGRA |                 |        |
| <i>0_Nostoc</i>         | 246 | MAVIPVIPPDLRPMVQLDGGRFAT-SDLNDLYRRVINRNNRLARLQEIL--                            | -APEIIVRNEKRMQLQEAVDALIDNGRRGRT |                 |        |
| <i>1_Litchi</i>         | 266 | LCLLPVLPEELRPPIIQIDGGKMS-SDINELYRRVIYRNNLTDLTTSRSTPGELVMCQEKLVQEAVDTLLDNGIRGQP |                                 |                 |        |
| <i>2_Arabidopsis</i>    | 266 | LCLLPVLPEELRPPIIQIDGGKMS-SDINELYRRVIYRNNLTDLTTSRSTPGELVMCQEKLVQEAVDTLLDNGIRGQP |                                 |                 |        |
| <i>3_Gossypium</i>      | 266 | LCLLPVLPEELRPPIIQIDGGKMS-SDINELYRRVIYRNNLTDLTTSRSTPGELVMCQEKLVQEAVDTLLDNGIRGQP |                                 |                 |        |
| <i>5_Ricinus</i>        | 240 | LCLLPVLPEELRPPIIQIDGGKMS-SDINELYRRVIYRNNLTDLTTSRSTPGELVMCQEKLVQEAVDTLLDNGIRGQP |                                 |                 |        |
| <i>6_Rosa</i>           | 273 | LCLLPVLPEELRPPIIQIDGGKMS-SDINELYRRVIYRNNLTDLTTSRSTPGELVMCQEKLVQEAVDTLLDNGIRGQP |                                 |                 |        |
| <i>9_Cucumis</i>        | 273 | LCLLPVLPEELRPPIIQIDGGKMS-SDINELYRRVIYRNNLTDLTTSRSTPGELVMCQEKLVQEAVDTLLDNGIRGQP |                                 |                 |        |
| <i>11_Nicotiana</i>     | 273 | LCLLPVLPEELRPPIIQIDGGKMS-SDINELYRRVIYRNNLTDLTTSRSTPGELVMCQEKLVQEAVDTLLDNGIRGQP |                                 |                 |        |
| <i>13_Syringa</i>       | 273 | LCLLPVLPEELRPPIIQIDGGKMS-SDINELYRRVIYRNNLTDLTTSRSTPGELVMCQEKLVQEAVDTLLDNGIRGQP |                                 |                 |        |
| <i>18_Liquidambar</i>   | 266 | LCLLPVLPEELRPPIIQIDGGKMS-SDINELYRRVIYRNNLTDLTTSRSTPGELVMCQEKLVQEAVDTLLDNGIRGQP |                                 |                 |        |
| <i>19_Papaver</i>       | 266 | LCLLPVLPEELRPPIIQIDGGKMS-SDINELYRRVIYRNNLTDLTTSRSTPGELVMCQEKLVQEAVDTLLDNGIRGQP |                                 |                 |        |
| <i>20_Ananas</i>        | 270 | LCLLPVLPEELRPPIIQIDGGKMS-SDINELYRRVIYRNNLTDLTTSRSTPGELVMCQEKLVQEAVDTLLDNGIRGQP |                                 |                 |        |
| <i>28_Liriodendron</i>  | 267 | LCLLPVLPEELRPPIIQIDGGKMS-SDINELYRRVIYRNNLTDLTTSRSTPGESVMCQEKLVQEAVDTLLDNGIRGQP |                                 |                 |        |
| <i>30_Magnolia</i>      | 267 | LCLLPVLPEELRPPIIQIDGGKMS-SDINELYRRVIYRNNLTDLTTSRSTPGESVMCQEKLVQEAVDTLLDNGIRGQP |                                 |                 |        |
| <i>32_Nymphaea</i>      | 273 | LSLLPVLPEELRPPIIQIDGGKMS-SDINELYRRVIYRNNLTDLTTSRSTPGELVMCQEKLVQEAVDTLLDNGIRGQP |                                 |                 |        |
| <i>33_Amborella</i>     | 266 | LCLLPVLPEELRPPIIQIDGGKMS-SDINELYRRVIYRNNLTDLTTSRSTPGESVMCQEKLVQEAVDTLLDNGIRGQP |                                 |                 |        |
| <i>35_Picea</i>         | 282 | LCLLPVLPEELRPPIVQLGEGGLITSDINELYRRVINRNNLTNLLARSGE--                           | -SFVICQKKLQEAVDALLDNGICGQP      |                 |        |
| <i>44_Ginkgo</i>        | 273 | LCLLPVLPEELRPPIVQLGEGGLITSDINELYRRVINRNNLTNLLARSGE--                           | -SFVICQKKLQEAVDALLDNGICGQP      |                 |        |
| <i>51_Physcomitrium</i> | 263 | LSLLPVLPEELRPPIELGEGGLITSDINELYRRVIYRNNLTDLTTSRSTPGELVMCQEKLVQEAVDTLLDNGIRGQP  |                                 |                 |        |

|                         |     | Rudder                                                                          | ccr | Switch2 |
|-------------------------|-----|---------------------------------------------------------------------------------|-----|---------|
|                         |     | Clamp                                                                           |     |         |
|                         |     | β'a11:S602-R674                                                                 |     |         |
|                         |     | β'b4:R598-D682                                                                  |     |         |
| <i>T. thermophilus</i>  | 591 | VTNPGSDRPLRLSLDILSGKQGRFRQNLGKRVDSGRSVIVVGPQLKHQCGLPKRMALELFKPFLLKKMEKGIAPNV    |     |         |
| <i>E. coli</i>          | 316 | ITG-SNKRPLKSLADMIKGGKQGRFRQNLGKRVDSGRSVITVGPYLRHLQCGLPKKMALELFKPFYVGKLELRGLATTI |     |         |
| <i>0_Nostoc</i>         | 323 | VVG-ANNRPLKSLSDIEGKQGRFRQNLGKRVDSGRSVIVVGPQLKHQCGLPREMAIELFQPFVFNRLIRSGMVNNI    |     |         |
| <i>1_Litchi</i>         | 345 | MRD-GHNKVYKSFSDVIEGKEGRFRETLLGKRVDSGRSVIVVGPSSLHRCGLPREIAIELFQTFVIRGLIRQHHLASNI |     |         |
| <i>2_Arabidopsis</i>    | 345 | MRD-GHNKVYKSFSDVIEGKEGRFRETLLGKRVDSGRSVIVVGPSSLHRCGLPREIAIELFQTFVIRGLIRQHHLASNI |     |         |
| <i>3_Gossypium</i>      | 345 | MRD-GHNKVYKSFSDVIEGKEGRFRETLLGKRVDSGRSVIVVGPSSLHRCGLPREIAIELFQTFVIRGLIRQHHLASNI |     |         |
| <i>5_Ricinus</i>        | 319 | MRD-GHNKVYKSFSDVIEGKEGRFRETLLGKRVDSGRSVIVVGPSSLHRCGLPREIAIELFQTFVIRGLIRQHHLASNI |     |         |
| <i>6_Rosa</i>           | 352 | MRD-GHNKVYKSFSDVIEGKEGRFRETLLGKRVDSGRSVIVVGPSSLHRCGLPREIAIELFQTFVIRGLIRQHHLASNI |     |         |
| <i>9_Cucumis</i>        | 352 | MRD-GHNKVYKSFSDVIEGKEGRFRETLLGKRVDSGRSVIVVGPSSLHRCGLPREIAIELFQTFVIRGLIRQHHLASNI |     |         |
| <i>11_Nicotiana</i>     | 352 | MRD-GHNKVYKSFSDVIEGKEGRFRETLLGKRVDSGRSVIVVGPSSLHRCGLPREIAIELFQTFVIRGLIRQHHLASNI |     |         |
| <i>13_Syringa</i>       | 352 | MRD-GHNKVYKSFSDVIEGKEGRFRETLLGKRVDSGRSVIVVGPSSLHRCGLPREIAIELFQTFVIRGLIRQHHLASNI |     |         |
| <i>18_Liquidambar</i>   | 345 | MRD-GHNKVYKSFSDVIEGKEGRFRETLLGKRVDSGRSVIVVGPSSLHRCGLPREIAIELFQTFVIRGLIRQHHLASNI |     |         |
| <i>19_Papaver</i>       | 345 | MRD-GHNKVYKSFSDVIEGKEGRFRETLLGKRVDSGRSVIVVGPSSLHRCGLPREIAIELFQTFVIRGLIRQHHLASNI |     |         |
| <i>20_Ananas</i>        | 349 | MRD-GHNKVYKSFSDVIEGKEGRFRETLLGKRVDSGRSVIVVGPSSLHRCGLPREIAIELFQTFVIRGLIRQHHLASNI |     |         |
| <i>28_Liriodendron</i>  | 346 | MRD-GHNKVYKSFSDVIEGKEGRFRETLLGKRVDSGRSVIVVGPSSLHRCGLPREIAIELFQTFVIRGLIRQHHLASNI |     |         |
| <i>30_Magnolia</i>      | 346 | MRD-GHNKVYKSFSDVIEGKEGRFRETLLGKRVDSGRSVIVVGPSSLHRCGLPREIAIELFQTFVIRGLIRQHHLASNI |     |         |
| <i>32_Nymphaea</i>      | 352 | MRD-GHNKVYKSFSDVIEGKEGRFRETLLGKRVDSGRSVIVVGPSSLHRCGLPREIAIELFQTFVIRGLIRQHHLASNI |     |         |
| <i>33_Amborella</i>     | 345 | MRD-GHNKVYKSFSDVIEGKEGRFRETLLGKRVDSGRSVIVVGPSSLHRCGLPREIAIELFQTFVIRGLIRQHHLASNI |     |         |
| <i>35_Picea</i>         | 360 | MRD-SHDPYKSFSDVIEGKEGRSRENLLGKRVDSGRSVIVVGPFLSLYQCGLPSEIAIELFQAFVIRSLIGHRIAPNL  |     |         |
| <i>44_Ginkgo</i>        | 352 | MKD-SRDRPYKSFSDVIEGKEGRSRENLLGKRVDSGRSVIVVGPFLSLYQCGLPSEIAIELFQAFVIRGPIGRHLAPNL |     |         |
| <i>51_Physcomitrium</i> | 342 | MKD-SHNRPYKSFSDVIEGKEGRFRENLLGKRVDSGRSVIVVGPFLSLYQCGLPSEIAIELFQAFVIRGLIGHRIAPNL |     |         |

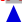

|                        |     | β' a12: I695-T793   |                                                |
|------------------------|-----|---------------------|------------------------------------------------|
|                        |     | β' b5: D686-T793    |                                                |
| <i>T. thermophilus</i> | 671 | KAARMLERQDIKDEVWDAL | EEVTHGKVVLLNRAPTLHRLGIQAFQPVLV                 |
| <i>E. coli</i>         | 395 | KAAKMMVEREE         | ---AVVWDILDEVIREHPVLLNRAPTLHRLGIQAFEPVLE       |
| 0_Nostoc               | 402 | KAAKKLISRND         | ---PSVWDVLEEVIEGHPVLLNRAPTLHRLGIQSFEPILVEGRAIQ |
| 1_Litchi               | 424 | GVAKSQIRDKG         | ---PIVWEILQEVMQGHPVLLNRAPTLHRLGIQAFQPI         |
| 2_Arabidopsis          | 424 | GVAKSQIREKK         | ---PIVWEILQEVMQGHPVLLNRAPTLHRLGIQSFQPI         |
| 3_Gossypium            | 424 | GVAKSQIREKK         | ---PIVWEILQEVMRGHPVLLNRAPTLHRLGIQAFQPI         |
| 5_Ricinus              | 398 | GVAKSQIREKE         | ---PIVWEILQEVMQGHPVLLNRAPTLHRLGIQAFQPI         |
| 6_Rosa                 | 431 | GVAKSQIREKE         | ---PVVWEILQEVMQGHPVLLNRAPTLHRLGIQAFQPI         |
| 9_Cucumis              | 431 | GVAKSQIREKE         | ---PIVWEILQEVMQGHPVLLNRAPTLHRLGIQAFQPI         |
| 11_Nicotiana           | 431 | GVAKSQIREKE         | ---PIVWEILQEVMQGHPVLLNRAPTLHRLGIQAFQPI         |
| 13_Syringa             | 431 | GVAKSQIREKE         | ---PIVWEILQEVMQGHPVLLNRAPTLHRLGIQAFQPI         |
| 18_Liquidambar         | 424 | GVAKSQIREKE         | ---PIVWEILQEVMQGHPVLLNRAPTLHRLGIQAFQPI         |
| 19_Papaver             | 424 | GVAKSQIREKE         | ---PIVWEILQEVMQGHPVLLNRAPTLHRLGIQAFQPI         |
| 20_Ananas              | 428 | GIAKSQIREKE         | ---PIVWEILQEVMQGHPVLLNRAPTLHRLGIQAFQPI         |
| 28_Liriodendron        | 425 | GIAKSQIREKE         | ---PIVWEILQEVMQGHPVLLNRAPTLHRLGIQAFQPI         |
| 30_Magnolia            | 425 | GIAKSQIREKE         | ---PIVWEILQEVMQGHPVLLNRAPTLHRLGIQAFQPI         |
| 32_Nymphaea            | 431 | GLAKSQIREKE         | ---PIVWEILQEVMQGHPVLLNRAPTLHRLGIQAFQPI         |
| 33_Amborella           | 424 | GIAKSQIREKE         | ---PIVWEILQEVMEGHPVLLNRAPTLHRLGIQAFQPI         |
| 35_Picea               | 439 | RAAKSMIRDKG         | ---PIVWEVLQEVMQGHPVLLNRAPTLHRLGIQAFQPI         |
| 44_Ginkgo              | 431 | RAAKSIIRDKG         | ---PVIWKVQLQEVMLGHPVLLNRAPTLHRLGIQAFQPI        |
| 51_Physcomitrium       | 421 | RAAKSMIQNK          | ---PIIWKILQEIIMQGHPVLLNRAPTLHRLGIQAFQPI        |

|                        |     | β' a12: I695-T793                                                          |           |
|------------------------|-----|----------------------------------------------------------------------------|-----------|
|                        |     | β' b5: D686-T793                                                           |           |
| <i>T. thermophilus</i> | 751 | LSSFAQAEARIQMLSAHNLLSPASGEPLAKPSRDIILGLYITQVRKE-K                          | -----KGA  |
| <i>E. coli</i>         | 472 | LTLEAQLEARALMMSTNNILSPANGEPITIVPSQDVVLGLYIMTRDCVNA                         | -----KGE  |
| 0_Nostoc               | 479 | LSLESQAEARLLMLASNNILSPATGKPIITPSQDMVLGAYYLTAENPGAT                         | -----KGA  |
| 1_Litchi               | 501 | LSLEAQAEARLLMFSHMNLSPAIGDPISVPTQDMLIGLYVLTSGTRRGICANRYNPWNRRNYQNERIDDN     | ---RYKYMK |
| 2_Arabidopsis          | 501 | LSLEAQAEARLLMFSHMNLSPAIGDPISVPTQDMLIGLYVLTSGTRRGICANRYNPWNRRNYQNERIYE-TNY  | ---KYTK   |
| 3_Gossypium            | 501 | LSLEAQAEARLLMFSHMNLSPAIGDPISVPTQDMLIGLYVLTSGNRRGICANRYNPWNRRNYQNERIDDN     | ---NYKSTR |
| 5_Ricinus              | 475 | LSLEAQAEARLLMFSHMNLSPAIGDPISVPTQDMLIGLYVLTSGNRRGICANRYNPWNRRNYQNERIYDNNNQ  | ---YTK    |
| 6_Rosa                 | 508 | LSLEAQAEARLLMFSHMNLSPAIGDPISVPTQDMLIGLYVLTSGNRRGICANRYNPWNRRNYQNERIYDNNNQ  | ---YTK    |
| 9_Cucumis              | 508 | LSLEAQAEARLLMFSHMNLSPAIGDPISVPTQDMLIGLYVLTSGNRRGICANRYNPWNRRNYQNERIYDNNNQ  | ---YTK    |
| 11_Nicotiana           | 508 | LSLEAQAEARLLMFSHMNLSPAIGDPISVPTQDMLIGLYVLTSGNRRGICANRYNPWNRRNYQNERIYDNNNQ  | ---YTK    |
| 13_Syringa             | 508 | LSLEAQAEARLLMFSHMNLSPAIGDPISVPTQDMLIGLYVLTSGNRRGICANRYNPWNRRNYQNERIYDNNNQ  | ---YTK    |
| 18_Liquidambar         | 501 | LSLEAQAEARLLMFSHMNLSPAIGDPISVPTQDMLIGLYVLTSGNRRGICANRYNPWNRRNYQNERIYDNNNQ  | ---YTK    |
| 19_Papaver             | 501 | LSLEAQAEARLLMFSHMNLSPAIGDPISVPTQDMLIGLYVLTSGNRRGICANRYNPWNRRNYQNERIYDNNNQ  | ---YTK    |
| 20_Ananas              | 505 | LSLEAQAEARLLMFSHMNLSPAIGDPISVPTQDMLIGLYVLTSGNRRGICANRYNPWNRRNYQNERIYDNNNQ  | ---YTK    |
| 28_Liriodendron        | 502 | LSLEAQAEARLLMFSHMNLSPAIGDPISVPTQDMLIGLYVLTSGNRRGICANRYNPWNRRNYQNERIYDNNNQ  | ---YTK    |
| 30_Magnolia            | 502 | LSLEAQAEARLLMFSHMNLSPAIGDPISVPTQDMLIGLYVLTSGNRRGICANRYNPWNRRNYQNERIYDNNNQ  | ---YTK    |
| 32_Nymphaea            | 508 | LSLEAQAEARLLMFSHMNLSPAIGDPISVPTQDMLIGLYVLTSGNRRGICANRYNPWNRRNYQNERIYDNNNQ  | ---YTK    |
| 33_Amborella           | 501 | LSLEAQAEARLLMFSHMNLSPAIGDPISVPTQDMLIGLYVLTSGNRRGICANRYNPWNRRNYQNERIYDNNNQ  | ---YTK    |
| 35_Picea               | 516 | LSLEAQAEARLLMFSETNLLSPAIGDPISVPTQDMLIGLYVLTSGNRRGICANRYNPWNRRNYQNERIYDNNNQ | ---YTK    |
| 44_Ginkgo              | 508 | LSLEAQAEARLLMFSETNLLSPAIGDPISVPTQDMLIGLYVLTSGNRRGICANRYNPWNRRNYQNERIYDNNNQ | ---YTK    |
| 51_Physcomitrium       | 498 | LSLEAQAEARLLMFSETNLLSPAIGDPISVPTQDMLIGLYVLTSGNRRGICANRYNPWNRRNYQNERIYDNNNQ | ---YTK    |

|                        |     |                                                        |                                           |
|------------------------|-----|--------------------------------------------------------|-------------------------------------------|
| <i>T. thermophilus</i> | 803 | GLEFATPEEALAAHERGEVALNAPIKVAGRETSVGRLLKYVFANPDEALLAVAH | -----GI---VDLQDVVTVRYMGKR                 |
| <i>E. coli</i>         | 524 | GMVLTGPKEAERLYRSGLASLHARVKVRITEYEK                     | -----DAN--GELVAKTS-----L                  |
| 0_Nostoc               | 532 | GNYFSSLEDVIMAFQDQIDLHAYIYVRFDGEIE                      | -----SDQPDTEPVKVTE-----N                  |
| 1_Litchi               | 578 | NPFFCNSYDAIGAFRQKRINLDSPLWLRW-LDQRVIS                  | ---R---EAPIEVHYESLGTYHEIFGHYLVRRVKKKILCIY |
| 2_Arabidopsis          | 578 | EPFFCNSYDAIGAYRQKRINLDSPLWLRW-LDQRVIS                  | ---R---EAPIEVHYESLGTYHEIFGHYLVRRVKKKILCIY |
| 3_Gossypium            | 578 | EPFFCNSYDAIGAYRQKRINLDSPLWLRW-LDQRVIS                  | ---R---EAPIEVHYQSSGTYHEIFGHYLVRRVKKKILCIY |
| 5_Ricinus              | 552 | ESFFSNSYDAIGAYRQKRINLDSPLWLRW-LDQRAIAS                 | ---R---EAPVEVHYESLGTYHEIFGHYLVRRVKKKILCIY |
| 6_Rosa                 | 585 | EPFFCNSYDAIGAYRQKRINLDSPLWLRW-LDQRVIS                  | ---R---ETPIEVHYESLGTSHYIYGHYLVRRVKKKILCIY |
| 9_Cucumis              | 585 | EPFFCNSYDAIGAYRQKRINLDSPLWLRW-LDQRVIS                  | ---R---EAPIEVHYESLGTSHYIYGHYLVRRVKKKILCIY |
| 11_Nicotiana           | 586 | EPFFCNSYDAIGAYRQKRINLDSPLWLRW-LDQRVIS                  | ---R---ETPIEVHYESLGTSHYIYGHYLVRRVKKKILCIY |
| 13_Syringa             | 585 | EPFFCNSYDAIGAYRQKRINLDSPLWLRW-LDQRVIS                  | ---R---ESPIEVHYESLGTSHYIYGHYLVRRVKKKILCIY |
| 18_Liquidambar         | 580 | EPFFCNSYDAIGAYRQKRINLDSPLWLRW-LDQRVIS                  | ---R---EAPIEVHYESLGTSHYIYGHYLVRRVKKKILCIY |
| 19_Papaver             | 580 | EPYFCSSYDALGAYRQKRINLDSPLWLRW-LDQRVIS                  | ---R---EAPIEVHYESLGTSHYIYGHYLVRRVKKKILCIY |
| 20_Ananas              | 584 | EPYFCSSYDALGAYRQKRINLDSPLWLRW-LDQRVIS                  | ---R---EAPIEVHYESLGTSHYIYGHYLVRRVKKKILCIY |
| 28_Liriodendron        | 579 | EPYFCSSYDALGAYRQKRINLDSPLWLRW-LDQRVIS                  | ---R---EAPIEVHYESLGTSHYIYGHYLVRRVKKKILCIY |
| 30_Magnolia            | 579 | EPYFCSSYDALGAYRQKRINLDSPLWLRW-LDQRVIS                  | ---R---EAPIEVHYESLGTSHYIYGHYLVRRVKKKILCIY |
| 32_Nymphaea            | 587 | EPYFCSSYDALGAYRQKRINLDSPLWLRW-LDQRVIS                  | ---R---EAPIEVHYESLGTSHYIYGHYLVRRVKKKILCIY |
| 33_Amborella           | 580 | EPYFCSSYDALGAYRQKRINLDSPLWLRW-LDQRVIS                  | ---R---EAPIEVHYESLGTSHYIYGHYLVRRVKKKILCIY |
| 35_Picea               | 584 | KPSFYSDYDALRAYRQKRIDLYSPLWLRWGEVLDLRTITSVNQ            | ---EAPIEVHYESLGTSHYIYGHYLVRRVKKKILCIY     |
| 44_Ginkgo              | 576 | KLSFSSYDALRAYRQKRIDLYSPLWLRWGEVLDLRTITSVNQ             | ---EAPIEVHYESLGTSHYIYGHYLVRRVKKKILCIY     |
| 51_Physcomitrium       | 567 | TPYFSSYDDVIAKYNQKQVRLHSAWLWLG-SKLRTITSINR              | ---EKPIEVHYESLGTSHYIYGHYLVRRVKKKILCIY     |

|                        |     |                                                                                           |
|------------------------|-----|-------------------------------------------------------------------------------------------|
| <i>T. thermophilus</i> | 873 | LETSPGRILFARIVAEAVEDEKVAWELIQL-----DVPQEKNSLKDLVYQAFRLRGMEKTARLLDALKYYGFTFSTTS            |
| <i>E. coli</i>         | 570 | KD <b>TTVGR</b> -----AIL <b>WM</b> IVPKGLPYSIVNQALGKKAISKMLNTCYRILGLKPTVIFADQIMYTGfAYAARS |
| 0_Nostoc               | 580 | --EDGTR-----TLL <b>YKFR</b> -----RVRQDAKGNVLSQYI---YT---TPGRVIYNNAIQ-EALAS----            |
| 1_Litchi               | 652 | IRTTVG <b>HIS</b> LYREIEEA <b>IQGF</b> CRACSYGT-----                                      |
| 2_Arabidopsis          | 652 | IRTTVG <b>HIS</b> FYREIEEA <b>IQGF</b> SQACSYDT-----                                      |
| 3_Gossypium            | 652 | IRTTVG <b>HIS</b> LYREIEEA <b>IQGF</b> FRAYSYDTQSYGI-----                                 |
| 5_Ricinus              | 626 | IRTTVG <b>HIS</b> LYREIEEA <b>IQGF</b> CQAGSDGI-----                                      |
| 6_Rosa                 | 659 | VRTTVG <b>HIS</b> LYREIEEA <b>IQGF</b> CRAYSYGT-----                                      |
| 9_Cucumis              | 659 | IRTTVG <b>HIS</b> LYREIEEA <b>IQGF</b> CRACSYGT-----                                      |
| 11_Nicotiana           | 660 | IRTTVG <b>HIS</b> LYREIEEA <b>IQGF</b> SRAYSSGT-----                                      |
| 13_Syringa             | 659 | IRTTVG <b>HIS</b> LYREIEEA <b>IQGF</b> SQACSYGT <b>ELS</b> -----                          |
| 18_Liquidambar         | 654 | IRTTVG <b>HIS</b> LYREIEEA <b>IQGF</b> YRACSYRT-----                                      |
| 19_Papaver             | 654 | IRTTVG <b>HIS</b> FYREIEEA <b>IQGF</b> SQACSYDT-----                                      |
| 20_Ananas              | 658 | IRTT <b>LGHIS</b> FYREIEEA <b>IQGF</b> CRAYSYTI-----                                      |
| 28_Liriodendron        | 653 | IRTTVG <b>HIS</b> FYREIEEA <b>IQGF</b> CRAYLYDT-----                                      |
| 30_Magnolia            | 653 | IRTTVG <b>HIS</b> FYREIEEA <b>IQGF</b> CRAYSYDT-----                                      |
| 32_Nymphaea            | 663 | IRTTVG <b>HIS</b> FYREIEEA <b>IQGF</b> CRSYSGT-----                                       |
| 33_Amborella           | 656 | IRTTVG <b>HIS</b> FYREIEEA <b>IQGF</b> CRTY-----                                          |
| 35_Picea               | 661 | IRTTVG <b>RTR</b> F <b>NRE</b> EEAI <b>QGF</b> AR-SEHPKKSLPALRI-----                      |
| 44_Ginkgo              | 652 | IRTTVG <b>RIR</b> F <b>NRE</b> IEEA <b>IQGF</b> SRASEHPNKSLKAI <b>RI</b> -----            |
| 51_Physcomitrium       | 643 | ICTTVG <b>RRI</b> F <b>NQ</b> IEEA <b>IQGT</b> LKASLFRNQSLPAIT <b>I</b> -----             |

|                        |     |                                         |
|------------------------|-----|-----------------------------------------|
| <i>T. thermophilus</i> | 946 | GITIGIDDAVIPEEKQYLEEADRKLLQIEQAYEMGFLTD |
| <i>E. coli</i>         | 636 | GASVGIDDMVIPEKKHEIISEAEVAEIQEQFQSGLVTA  |
| 0_Nostoc               |     | -----                                   |
| 1_Litchi               |     | -----                                   |
| 2_Arabidopsis          |     | -----                                   |
| 3_Gossypium            |     | -----                                   |
| 5_Ricinus              |     | -----                                   |
| 6_Rosa                 |     | -----                                   |
| 9_Cucumis              |     | -----                                   |
| 11_Nicotiana           |     | -----                                   |
| 13_Syringa             |     | -----                                   |
| 18_Liquidambar         |     | -----                                   |
| 19_Papaver             |     | -----                                   |
| 20_Ananas              |     | -----                                   |
| 28_Liriodendron        |     | -----                                   |
| 30_Magnolia            |     | -----                                   |
| 32_Nymphaea            |     | -----                                   |
| 33_Amborella           |     | -----                                   |
| 35_Picea               |     | -----                                   |
| 44_Ginkgo              |     | -----                                   |
| 51_Physcomitrium       |     | -----                                   |

**Figure S5** : sequence alignment of the  $\beta''$  subunits from PEP of angiosperms with those of the RNAPs from *E. coli*, *T. thermophilus* and Nostoc. The residues conserved more than 50 % are in red, those mutated in similar residues are in blue. The strictly conserved residues described by Lane & Darst (Lane & Darst, 2010) are highlighted in gray. The blue triangles show mutations observed among the strictly conserved residues described (Lane & Darst, 2010). The non-conservative mutations, at least three in a row in the  $\beta$  or  $\beta'$  domain in *E. coli* and *T. thermophilus*, are highlighted in green and displayed on the *E. coli* structure (PDB entry: 6GH5). Those colored in orange are nearby to the DNA, those in green are located at the surface of the subunits. The domains described for all-RNA polymerase (a) and the bRNAPs (b) are also given and highlighted in yellow and cyan respectively. The name of the RNAP domains are also given and highlighted in purple and green (Lane & Darst, 2010; Sutherland & Murakami, 2018).

|                        |     | β' a13: L914-E979                                                              |  |
|------------------------|-----|--------------------------------------------------------------------------------|--|
|                        |     | β' b6: K908-F1011                                                              |  |
| <i>T. thermophilus</i> | 888 | EAVEDEKVAWELIQLDV-----P-----QEKNSLKDLVYQAFRLRGMEKTARLLDALKYYGFTFSTTSGITIGIDD   |  |
| <i>E. coli</i>         | 571 | DTTVGRAILWMIVPKGL-----PYSIVNQALGKKAKSKMLNTCYRILGLKPTVIFADQIMYTGFAAARSASVIGIDD  |  |
| 0_Nostoc               | 1   | -----MTEKMFRRNVVDKQGLRNLISWAFTHYGTARTAVMADKLDLGFYATRAGVSVISVDD                 |  |
| 1_Litchi               | 1   | -----MAER-----AGLVFHNKVIDGTAIKRLISRLIDHFGMAYTSHILDQVKTLGFQQTATATSLGIDD         |  |
| 2_Arabidopsis          | 1   | -----MAER-----ANLVFHNKVIDGTAIKRLISRLIDHFGMAYTSHILDQVKTLGFQQTATATSLGIDD         |  |
| 3_Gossypium            | 1   | -----MAER-----ANLVFHNKVIDGTAIKRLISRLIDHFGMAYTSHILDQVKALGFQQTATATSLGIDD         |  |
| 5_Ricinus              | 1   | -----MEVLMAKR-----ANLVFHNKVIDGTAIKRLISRLIDHFGMAYTSHILDQVKTLGFQQTATATSLGIDD     |  |
| 6_Rosa                 | 1   | -----MAER-----ASLVFHNKVIDGTAIKRLISRLIDHFGMAYTSHILDQVKTLGFQQTATATSLGIDD         |  |
| 9_Cucumis              | 1   | -----MAER-----ADLVFHNKVIDGTAIKRLISRLIDHFGMAYTSHILDQVKTLGFQQTATATSLGIDD         |  |
| 11_Nicotiana           | 1   | -----MAER-----ANLVFHNKVIDGTAIKRLISRLIDHFGMAYTSHILDQVKTLGFQQTATATSLGIDD         |  |
| 13_Syringa             | 1   | -----MEVLMAER-----TNLVFHNKVIDGTAIKRLISRLIDHFGMAYTSHILDQVKTLGFQQTATATSLGIDD     |  |
| 18_Liquidambar         | 1   | -----MEVLMAER-----ANLVFHNKVIDGTAIKRLISRLIDHFGMAYTSHILDQVKTLGFQQTATATSLGIDD     |  |
| 19_Papaver             | 1   | -----MAER-----ADLVFHNKVIDGTAIKRLISRLIDHFGMAYTSHILDQVKTLGFQQTATATSLGIDD         |  |
| 20_Ananas              | 1   | -----MAER-----ADLVFHNKVIDGTAIKRLISRLIDHFGMAYTSHILDQVKTLGFQQTATATSLGIDD         |  |
| 28_Liriodendron        | 1   | -----MEVLMAER-----ADLVFHNKVIDGTAIKRLISRLIDHFGMAYTSHILDQVKTLGFQQTATATSLGIDD     |  |
| 30_Magnolia            | 1   | -----MEVLMAER-----ADLVFHNKVIDGTAIKRLISRLIDHFGMAYTSHILDQVKTLGFQQTATATSLGIDD     |  |
| 32_Nymphaea            | 1   | -----MEVLMAER-----ADLVFHNKVIDGTAIKRLISRLIDHFGMAYTSHILDQVKTLGFQQTATATSLGIDD     |  |
| 33_Amborella           | 1   | -----MAER-----AGLVFHNKVIDGTAIKRLISRLIDHFGMAYTSHILDQVKTLGFQQTATATSLGIDD         |  |
| 35_Picea               | 1   | -----MKIWRFFLMKERTRLPFDNLPFYNKVMDKTAIKRLISRLIDHFGMAYTSHILDQVKTLGFQQTATATSLGIDD |  |
| 44_Ginkgo              | 1   | -----MTER-----AKLLFHNKVMNRATKQLISRLIDHFGMAYTSHILDQVKTLGFQQTATATSLGIDD          |  |
| 51_Physcomitrium       | 1   | -----MLFYNKVMDRTAIKQLISRLIDHFGMAYTSHILDQVKTLGFQQTATATSLGIDD                    |  |

|                        |     | Secondary channel rim-helices                                                 |  |
|------------------------|-----|-------------------------------------------------------------------------------|--|
|                        |     | β' a13: L984-E979                                                             |  |
|                        |     | β' a14: T984-F1011                                                            |  |
|                        |     | β' b6: K908-F1011                                                             |  |
| <i>T. thermophilus</i> | 954 | AVIPEEKQYLEADRKLQIEQAYEMGFLTDREYDQILQLWTETTEKVTQAVFKNFE-----ENYFPNPLY         |  |
| <i>E. coli</i>         | 644 | MVIPEKKHEIISAEAEVAEIQEQFQSGLVTAGERYNKVIDIWAANDRVSKAMMDNLQETVINRDGQEEKQVSNFSIY |  |
| 0_Nostoc               | 60  | LMVPTKRSLLAEAEIRATEARYQRGEITEVERFQKVIDTWNGTSEALKDEVVVHFK-----KTNPLNSVY        |  |
| 1_Litchi               | 62  | LLTIPSKGWLVDQAEQQSLILEKHHHYGNVHAVEKLRSIEIWTATSEYLRQEMNPNFR-----MTDPLNPVH      |  |
| 2_Arabidopsis          | 62  | LLTIPSKGWLVDQAEQQSLILEKHHHYGNVHAVEKLRSIEIWTATSEYLRQEMNPNFR-----MTDPLNPVH      |  |
| 3_Gossypium            | 62  | LLTIPSKGWLVDQAEQQSLILEKHHHYGNVHAVEKLRSIEIWTATSEYLRQEMNPNFR-----MTDPLNPVH      |  |
| 5_Ricinus              | 66  | LLTIPSKGWLVDQAEQQSLILEKHHHYGNVHAVEKLRSIEIWTATSEYLRQEMNPNFR-----MTDPLNPVH      |  |
| 6_Rosa                 | 62  | LLTIPSKGWLVDQAEQQSLILEKHHHYGNVHAVEKLRSIEIWTATSEYLRQEMNPNFR-----MTDPLNPVH      |  |
| 9_Cucumis              | 62  | LLTIPSKGWLVDQAEQQSLILEKHHHYGNVHAVEKLRSIEIWTATSEYLRQEMNPNFR-----MTDPLNPVH      |  |
| 11_Nicotiana           | 62  | LLTIPSKGWLVDQAEQQSLILEKHHHYGNVHAVEKLRSIEIWTATSEYLRQEMNPNFR-----MTDPLNPVH      |  |
| 13_Syringa             | 66  | LLTIPSKRVLVDQAEQQSLILEKHHHYGNVHAVEKLRSIEIWTATSEYLRQEMNPNFR-----MTDPLNPVH      |  |
| 18_Liquidambar         | 66  | LLTIPSKGWLVDQAEQQSLILEKHHHYGNVHAVEKLRSIEIWTATSEYLRQEMNPNFR-----MTDPLNPVH      |  |
| 19_Papaver             | 62  | LLTIPSKGWLVDQAEQQSLILEKHHHYGNVHAVEKLRSIEIWTATSEYLRQEMNPNFR-----MTDPLNPVH      |  |
| 20_Ananas              | 62  | LLTIPSKGWLVDQAEQQSLILEKHHHYGNVHAVEKLRSIEIWTATSEYLRQEMNPNFR-----MTDPLNPVH      |  |
| 28_Liriodendron        | 66  | LLTIPSKGWLVDQAEQQSLILEKHHHYGNVHAVEKLRSIEIWTATSEYLRQEMNPNFR-----MTDPLNPVH      |  |
| 30_Magnolia            | 66  | LLTIPSKGWLVDQAEQQSLILEKHHHYGNVHAVEKLRSIEIWTATSEYLRQEMNPNFR-----MTDPLNPVH      |  |
| 32_Nymphaea            | 66  | LLTIPSKRVLVDQAEQQSLILEKHHHYGNVHAVEKLRSIEIWTATSEYLRQEMNPNFR-----MTDPLNPVH      |  |
| 33_Amborella           | 62  | LLTIPSKGWLVDQAEQQSLILEKHHHYGNVHAVEKLRSIEIWTATSEYLRQEMNPNFR-----MTDPLNPVH      |  |
| 35_Picea               | 75  | LLTAPSKAWLVDQAEQQSGVSEKQNHYGNNVHAVEKLRSIEIWTATSEYLRKEMNPNFS-----MTDPLNPVH     |  |
| 44_Ginkgo              | 62  | LLTAPSKRWLVDQAEQQSGSIEKHHHYGNVHAVEKLRSIEIWTATSEYLRQEMNPNFG-----MTDPLNPVH      |  |
| 51_Physcomitrium       | 56  | LLTAPSKSWLVDQAEQQGYISEKHRYGNVHAVEKLRLIETWTATSEYLRQEMNPNFR-----MTDPLNPVH       |  |

|                        |      | Bridge helix                                                                     |  |
|------------------------|------|----------------------------------------------------------------------------------|--|
|                        |      | β' a15: N1018-G1113                                                              |  |
|                        |      | β' b7: N1018-G1113                                                               |  |
| <i>T. thermophilus</i> | 1022 | VMAQSGARGNPQQIRQLCGLRGLMQKPSGETFEVVRSSFREGLTVLEYFISSHGARKGGADTALRTADSGYLTRKLVDV  |  |
| <i>E. coli</i>         | 724  | MMADSGARGSAQIRQLAGMRGLMAKPDGSIETPTITANFREGLNVLYQFISTHGARKGLADTALKANSGLYTRRLVDV   |  |
| 0_Nostoc               | 128  | MMAFSGARGNISQVRQLVGMRLMSDPQGGQIDLPISQNLREGLSLTEYIISCYGARKGVVDTAVRTSDAGYLTRRLVEV  |  |
| 1_Litchi               | 130  | IMSFSGARGNASQVHQLVGMRLMSDPQGGQIDLPISQNLREGLSLTEYIISCYGARKGVVDTAVRTSDAGYLTRRLVEV  |  |
| 2_Arabidopsis          | 130  | MMSFSGARGNASQVHQLVGMRLMSDPQGGQIDLPISQNLREGLSLTEYIISCYGARKGVVDTAVRTSDAGYLTRRLVEV  |  |
| 3_Gossypium            | 130  | IMSFSGARGNASQVHQLVGMRLMSDPQGGQIDLPISQNLREGLSLTEYIISCYGARKGVVDTAVRTSDAGYLTRRLVEV  |  |
| 5_Ricinus              | 134  | IMSFSGARGNASQVHQLVGMRLMSDPQGGQIDLPISQNLREGLSLTEYIISCYGARKGVVDTAVRTSDAGYLTRRLVEV  |  |
| 6_Rosa                 | 130  | MMSFSGARGNASQVHQLVGMRLMSDPQGGQIDLPISQNLREGLSLTEYIISCYGARKGVVDTAVRTSDAGYLTRRLVEV  |  |
| 9_Cucumis              | 130  | IMSFSGARGNASQVHQLVGMRLMSDPQGGQIDLPISQNLREGLSLTEYIISCYGARKGVVDTAVRTSDAGYLTRRLVEV  |  |
| 11_Nicotiana           | 130  | IMSFSGARGNASQVHQLVGMRLMSDPQGGQIDLPISQNLREGLSLTEYIISCYGARKGVVDTAVRTSDAGYLTRRLVEV  |  |
| 13_Syringa             | 134  | IMSFSGARGNASQVHQLVGMRLMSDPQGGQIDLPISQNLREGLSLTEYIISCYGARKGVVDTAVRTSDAGYLTRRLVEV  |  |
| 18_Liquidambar         | 134  | IMSFSGARGNASQVHQLVGMRLMSDPQGGQIDLPISQNLREGLSLTEYIISCYGARKGVVDTAVRTSDAGYLTRRLVEV  |  |
| 19_Papaver             | 130  | IMSFSGARGNASQVHQLVGMRLMSDPQGGQIDLPISQNLREGLSLTEYIISCYGARKGVVDTAVRTSDAGYLTRRLVEV  |  |
| 20_Ananas              | 130  | LMSFSGARGNASQVHQLVGMRLMSDPQGGQIDLPISQNLREGLSLTEYIISCYGARKGVVDTAVRTSDAGYLTRRLVEV  |  |
| 28_Liriodendron        | 134  | IMSFSGARGNASQVHQLVGMRLMSDPQGGQIDLPISQNLREGLSLTEYIISCYGARKGVVDTAVRTSDAGYLTRRLVEV  |  |
| 30_Magnolia            | 134  | IMSFSGARGNASQVHQLVGMRLMSDPQGGQIDLPISQNLREGLSLTEYIISCYGARKGVVDTAVRTSDAGYLTRRLVEV  |  |
| 32_Nymphaea            | 134  | IMSYSGARGNASQVHQLVGMRLMSDPQGGQIDLPISQNLREGLSLTEYIISCYGARKGVVDTAVRTSDAGYLTRRLVEV  |  |
| 33_Amborella           | 130  | MMSFSGARGNASQVHQLVGMRLMSDPQGGQIDLPISQNLREGLSLTEYIISCYGARKGVVDTAVRTSDAGYLTRRLVEV  |  |
| 35_Picea               | 143  | VMSFSGARGSTSQVHQLVGMRLMSDPQGGQIDLPISQNLREGLSLTEYIISCYGARKGVVDTAVRTSDAGYLTRRLVEV  |  |
| 44_Ginkgo              | 130  | MMSFSGARGNSTSQVHQLVGMRLMSDPQGGQIDLPISQNLREGLSLTEYIISCYGARKGVVDTAVRTSDAGYLTRRLVEV |  |
| 51_Physcomitrium       | 124  | MMSFSGARGSTSQVHQLVGMRLMSDPQGGQIDLPISQNLREGLSLTEYIISCYGARKGVVDTAVRTSDAGYLTRRLVEV  |  |

▲ ▲ ▲



*T. thermophilus* 1102 THEIVVREADCGTTNYSIV-PLFQPDVETRSLRLRKRADEAGLYGRVLAREVEVLGVR---LEEGRYLSMDDVHLLIKA  
*E. coli* 804 AQDLVVTEDDCGTHEGIMMTPVIEGGDVKEPLRDR-----VLGRVTAEDVLKPGTADILVPRNTLLHE----QWCDL  
0\_Nostoc 208 SQDVIREFDCGTTRGIPIRPMTEGAK---TLIPL-----ANRLMGRVIGEDVVHPVTKEVIAPRNTPISSDLAKEI---  
1\_Litchi 210 VQHIVVVRTDCGTTIRGISVSPQN--RMMSERVF-----SQTLMGRVLADDIYI--GPRCIAIRNQDIGIGLVNRF---  
2\_Arabidopsis 210 VQHIVVVRTDCGTTIRGISVSPRNKNRMMSERIF-----IQTIGRVLADDIYI--GSRCAFRNQDLIGIGLVNRL---  
3\_Gossypium 210 VQHIVVVRTDCGTTIRGISVSPQK--RTLPERIF-----IQTIGRVLADDIYM--GPRCIAIRNQDIGIGLVDRF---  
5\_Ricinus 214 VQHIVVVRTDCGTTIRGISVSPQN--GMMSERIF-----IQTIGRVLADNIYM--GLRCIAIRNQDIGIRLANRF---  
6\_Rosa 210 VQHIVVVRTDCGTTIRGISVSPRN--GMPERIF-----IQTIGRVLADDIYI--GPRCIAVRNQDIGIGLVNRF---  
9\_Cucumis 210 VQHIVVVRTDCGTTIRGILVSPGN--RMIPERIF-----IQTIGRVLADDIYM--GPRCIGVRNQDIGIGLVNRF---  
11\_Nicotiana 210 VQHIVVVRTDCGTTIRGISVSPRN--GMPERIF-----IQTIGRVLADDIYM--GPRCIAIRNQDIGIGLVNRF---  
13\_Syringa 214 VQHIVVVRTDCGTTIRGISVSPRN--GMPERIF-----IQTLMGRVLADDIYT--GTRCIASRNQDVIGIGLVNRF---  
18\_Liquidambar 214 VQHIVVVRTDCGTTIRGISVSRN--GMPERIF-----IQTIGRVLADDIYM--GPRCIAIRNQDIGIGLVNRF---  
19\_Papaver 210 VQHIVVVRTDCGTTIRGISVSPRN--GMMTERIF-----IQTIGRVLADDIYM--GSRCAIRNQDIGIGLVNRF---  
20\_Ananas 210 VQHIVVVRTDCGTTIRGISVSPQN--GM-TEKIF-----VQTIGRVLADDIYI--GLRCIAIRNQDIGIGLVNRF---  
28\_Liriodendron 214 VQHIVVVRTDCGTTIRGISVSPRN--GM-TEKIL-----IQTIGRVLADDIYM--GLRCIAIRNQDIGIGLVNRF---  
30\_Magnolia 214 VQHIVVVRTDCGTTIRGISVSPRN--GM-TEKIW-----IQTIGRVLADDIYM--GLRCIAIRNQDIGIGLVNRF---  
32\_Nymphaea 214 VQHIVVVRTDCGTTIRGISVSLRK--GM-TERIF-----IQTIGRVLADNYYL--GLRCIAIRNQDIGIGLVNRF---  
33\_Amborella 210 VQHIVVVRTDCGTTIRGISVSRN--GMMSERIF-----IQTIGRVLADDIYI--GPRCIAVRNQDIGIGLVNRF---  
35\_Picea 223 VQHIVVRRKDCGTIQGIFVSPIRGRERDRNEIVVR---TQILIGRVLADNYYI--NRRCIAIRNQDIGVGLANQL---  
44\_Ginkgo 210 VQHIVVRRADCGTIRGISVSPIRGRERIKKEFVL-----QTLIGRVLADNYYI--NKRCIAIRNQDIGVGLADQL---  
51\_Physcomitrium 204 VQHIVVRKVDCGTSENIFVTLQNNY-----KK-----NNKLIGRILADNYYI--NGRCIAIRNQDITTNLVISL---

Trigger loop-helix1 Trigger loop

β'a16:R1213-A1247

β'b8:V1186-A1247

*T. thermophilus* 1178 AEAGEIQEVPVRSPLTCQTRYGVCQKCYGYDLSMARPVSIIEAVGIVAAQSIGEPGTQLTMRTFHTGGVAGAA-----  
*E. coli* 872 LEENSVDVAVKVRVSVSCDTEFGVCAHCYGRDLARGHIINKGEAIGVIAAQSIGEPGTQLTMRTFHTGGVAGAAESSIQ  
0\_Nostoc 277 -GRSGVGEVVRSPLTCEAARSVCQHCYGSWLAHAKMVDLGEAVGIIAQSIGEPGTQLTMRTFHTGGVFTGEVAQQVRS  
1\_Litchi 276 -ITFRTQAIISIRTPFTCRSTSWICRLCYGRSPTHGDLVELGEAVGIIISGQSIGEPGTQLTLRTFHTGGVFTGGTAEHVRA  
2\_Arabidopsis 278 -ITFGTQSIISIRTPFTCRSTSWICRLCYGRSPTHGDLVELGEAVGIIAGQSIGEPGTQLTLRTFHTGGVFTGGTAEHVRA  
3\_Gossypium 276 -RAFRTQPIISIRTPFTCRSTSWICRLCYGRSPTHGDLVELGEAVGIIAGQSIGEPGTQLTLRTFHTGGVFTGGTAEHVRA  
5\_Ricinus 280 -ITFRTQTIISIRTPFTCRSTSWICRLCYGRSPTHGDLVELGEAVGIIAGQSIGEPGTQLTLRTFHTGGVFTGGTAEHVRA  
6\_Rosa 276 -ITFQTQPIISIRTPFTCRSTSWICRLCYGRSPTHGDLVELGEAVGIIAGQSIGEPGTQLTLRTFHTGGVFTGGTAEHVRA  
9\_Cucumis 276 -ITFQTQPIISIRTPFTCRSTSWICRLCYGRSPTHGDLVELGEAVGIIAGQSIGEPGTQLTLRTFHTGGVFTGGTAEHVRA  
11\_Nicotiana 276 -ITFRAQPIISIRTPFTCRSTSWICRLCYGRSPTHGDLVELGEAVGIIAGQSIGEPGTQLTLRTFHTGGVFTGGTAEHVRA  
13\_Syringa 280 -ITFRAQPIISIRTPFTCRSASWICRLCYGRSPTHGDLVELGEAVGIIAGQSIGEPGTQLTLRTFHTGGVFTGGTAEHVRA  
18\_Liquidambar 280 -ITFRAQPIISIRTPFTCRSTSWICRLCYGRSPTHGDLVELGEAVGIIAGQSIGEPGTQLTLRTFHTGGVFTGGTAEHVRA  
19\_Papaver 276 -ITFRAQPIIYIRTPFTCRSTSWICRLCYGRSSTHGDLVELGEAVGIIAGQSIGEPGTQLTLRTFHTGGVFTGGTAEHVRA  
20\_Ananas 275 -ITFRAQPIIYIRTPFTCRSTSWICRLCYGRSPTHGDLVELGEAVGIIAGQSIGEPGTQLTLRTFHTGGVFTGGTAEHVRA  
28\_Liriodendron 279 -ITFRAQSIYIRTPFICRSTSWICRLCYGRSPTHGDLVELGEAVGIIAGQSIGEPGTQLTLRTFHTGGVFTGGTAEHVRA  
30\_Magnolia 279 -ITFRAQSIYIRTPFICRSTSWICRLCYGRSPTHGDLVELGEAVGIIAGQSIGEPGTQLTLRTFHTGGVFTGGTAEHVRA  
32\_Nymphaea 279 -MTSRAQPIIYIRTPFICRSTSWICRLCYGRSPTHGDLVELGEAVGIIAGQSIGEPGTQLTLRTFHTGGVFTGGTAEHVRA  
33\_Amborella 276 -ITFQTQPIISIRTPFTCKSTSWICRLCYGRSPTHGDLVELGEAVGIIAGQSIGEPGTQLTLRTFHTGGVFTGGTAEHVRA  
35\_Picea 293 -INLRTQPIIYIRTPFTCKSISRICLCYGRSTTHNHLIELGEAVGIIAGQSIGEPGTQLTLRTFHTGGVFTGDIAEHVRA  
44\_Ginkgo 278 -RTLRTQPIIYIRTPFTCKSLSRICLCYGRSPTHNLIELGEAVGIIAGQSIGEPGTQLTLRTFHTGGVFTGDIAEHVRA  
51\_Physcomitrium 267 -INFQRKGIIFIRSLPLCKSMLWICLCYGSWLTGHNLIELGEAVGIIAGQSIGEPGTQLTLRTFHTGGVFTGDIAEHVRA

▲ ▲

*T. thermophilus* 1251 -----  
*E. coli* 952 VKNKGSIKL-----  
0\_Nostoc 356 -KIDGTVKIPRKLRTQYRTRHGEDALYVEANGVILEPKKEGDATPANQEVQLTQGSTLYVFDGNQVKQGQLLAEVALG  
1\_Litchi 355 -PSNGKIKFNEDLV-HPTRTRHGHPAFLCYIDLVTIESEDI-----MHKVITIPPKSFLLVQNDQYVESEQVIAEIRAG  
2\_Arabidopsis 357 -PYNGKIKFNEDLV-HPTRTRHGHPAFLCYIDLVTIESEDI-----IHSVITIPPKSFLLVQNDQYVESEQVIAEIREG  
3\_Gossypium 355 -PFNGKIKFNEDLV-HPTRTRHGHPAFLCYIDLVTIESEDI-----IHKVITIPPKSFLLVQNDQYVESEQVIAEIRAG  
5\_Ricinus 359 -PSNGKIKFNEDLV-HPIRTRHGHPAFLCYIDLVTIESHDI-----IHNATIPPKSFLLVQNNQYVESEQVIAEIRAG  
6\_Rosa 355 -PSNGKIKFNEDLV-HPTRTRHGHPAFLCYIDLVTIESENI-----IHNVTIPPKSLILVQNDQYVESEQVIAEIRAG  
9\_Cucumis 355 -SSNGKIKFNENLV-HPTRTRHGHPAFLCYIDLVTIESEDI-----IHNVTIPPKSLLLVQNDQYVESEQVIAEIRAG  
11\_Nicotiana 355 -PSNGKIKFNEDLV-HPTRTRHGHPAFLCSIDLVTIESEDI-----LHNVNIPPKSLLLVQNDQYVESEQVIAEIRAG  
13\_Syringa 359 -PSNGKIKFNEDLV-HPTRTRHGHPAFLCSIDLVTIESEDI-----LHNVNIPKSKSFLLVQNDQYVESEQVIAEIRAG  
18\_Liquidambar 359 -PSNGKIKFNEDLV-HPIRTRHGHPAFLCYIDLVTIESEDI-----LHNVNIPKSKSFLLVQNDQYVESEQVIAEIRAG  
19\_Papaver 355 -PSNGKIKFNEDLV-HPTRTRHGHPAFLCYIDLVTIESQDI-----IHNVNIPPKSFLLVQNDQYVESEQVIAEIRAG  
20\_Ananas 354 -PSNGKIKFNEDLV-HPTRTRHGHPAFLCSIDLVTIESEDI-----IHNVTIPPKSLLLVQNDQYVESEQVIAEIRAG  
28\_Liriodendron 358 -PSNGKIKFNECLV-HPTRTRHGHPAFLCYIDLVTIESQDI-----IHNVNIPPKSFLLVQNDQYVESEQVIAEIRAG  
30\_Magnolia 358 -PSNGKIKFNEDLV-HPTRTRHGHPAFLCYIDLVTIESQDI-----LHNVNIPPKSFLLVQNDQYVESEQVIAEIRAG  
32\_Nymphaea 358 -PSNGKIKFNEDLV-HPTRTRHGHPAFLCYIDLVTIESQDI-----IHSVNIIPPKSFLLVQNDQYVESEQVIAEIRAG  
33\_Amborella 355 -PSNGKIKFNEDLA-HPTRTRHGHPAFLCSIDLVTIESEDI-----IHNVTIPPKSLLLVQNDQYVESEQVIAEIRAG  
35\_Picea 372 -PFNGKIEFNENLV-YPTRTCNGHPAYLCHNNLSITIHGQDQ-----VKNLTIPPKSLLLVQNDQYVESEQVIAEVRAR  
44\_Ginkgo 357 -PFNGKIQFNENLV-HPTRTRHGHPASICHNELSITIDGQDQ-----VHSLTIPSKSLLLVQNDQYVESEQVIAEARAR  
51\_Physcomitrium 346 -PFNGIIQFDTNSV-YPTRTRHGHPAWICNNLSVVIKSKKK-----LHNLVITPQSKLLLVQSNQYVESQVIAEVRAR

*T. thermophilus* 1251 -----  
*E. coli* 961 -----SNVKS~~V~~VNS~~S~~GKLVITS-----  
0\_Nostoc 435 GRTTRTNT~~E~~KAVKDVASDLAGEVQFAEVVPEQKTD~~RQ~~GNTTTTAARGGL~~I~~WILSGEVYNLPPGAELVVKNGDAIASN~~G~~VL  
1\_Litchi 427 TY-TLNFKERVRKHIYSDSEGEMHWSTDVYHAPEFTY~~S~~NVH-LLPKTSHLWILSGGSCGSGVVSFSLYKDQDQLSIHYRS  
2\_Arabidopsis 429 TY-TFHFKERVRKYIYSDSEGEMHWSTDVSHAPEFTY~~S~~NVH-LLPKTSHLWILSGGSCGSSILRFSIHKDQDQMNIPFLS  
3\_Gossypium 427 TY-TLNLKERVRKHIYSDSEGEMHWSTDVYHSPFTY~~S~~NVH-LLPKTSHLWILSGGSYKFSVVPFSLHKDQDQINIHYSLS  
5\_Ricinus 431 TY-TLNFKEKVRKHIYSDSEGEMHWSTDVYHAPEFTY~~S~~NVH-LLPKTSHLWILSGNSCRSSIVPFSLHKDQDQMNVSLS  
6\_Rosa 427 AY-TFNFKERVRKHIYSDSEGEMHWSTDVYHAPEFTY~~S~~NVH-LLPKTSHLWILSGGSCRFSAVPPSLHKDQDQTNVHSL  
9\_Cucumis 427 TY-TLNLKERVRKHIYSDSEGEMHWSTDVYHAPEFTY~~S~~NVH-LLPKTSHLWILSGGSCGCSVVPFSLYKDQDQINVHSLC  
11\_Nicotiana 427 IS-TLNFKEKVRKHIYSDSDGEMHWSTDVYHAPEFTY~~G~~NVH-LLPKTSHLWILLGRPCRSSLVYLSLHKDQDQMAHFLS  
13\_Syringa 431 TS-TLNFKEKVRKHIYSDSDGEMHWSTDVYHAPEFTY~~G~~NVH-LLPKTSHLWILLGGPCRSSLVSLSLHKDQDQINAHSR  
18\_Liquidambar 431 TY-TFNFKERVRKHIYSDSEGEMHWSTDVYHAPEFTY~~G~~NVH-LLPKTSHLWILSGGSCRSSVVPFSLHKDQDQMNVSLS  
19\_Papaver 427 TS-TFNFKERVRKHIYSDLEGEMHWSTDVYHAPEYTY~~G~~NVH-LLPKTSHLWILSGGLCRSSIVPFLGKDQDQTNVHSLF  
20\_Ananas 426 TS-TFHFKERVRKHIYSESEGEMHWSTDVYHAPEYTY~~G~~NVH-LLPKTSHLWILAGGPCCRSSIVSFSLHKDQDQMNVSLS  
28\_Liriodendron 430 TS-TFNFKERVRKHIYSDSEGEMHWSTDVYHAPEYTY~~G~~NVH-LLPKTSHLWILSGGPCRSSIVPFLGKDQDQMNVSLS  
30\_Magnolia 430 TS-TFNFKERARKHIYSDSEGEMHWSTDVYHAPEYTY~~G~~NVH-LLPKTSHLWILSGGPCRSSIVTFLSLHKDQDQMNVSLS  
32\_Nymphaea 430 TS-TFHFKERVRKHIYSDSEGEMHWSTGVYHAPEYTH~~G~~NVH-FLPKTSHLWILSGGPCSSLVPFSLHKDQDQMNVSLS  
33\_Amborella 427 TS-TLNFKEKVRKHIYSDSEGEMHWSTDVYHAPDFTY~~S~~NVH-LLPKTSHLWILSGSSYRSSVVPFSLYKDQDQTNVFLS  
35\_Picea 444 TS---SFKEKVRKNIYSDLEGEMHWSTNVCHAPEYVH~~G~~NVH-PLRTGYLWILSGGIYSGSVPPFPFHKHQDQVDVQPFV  
44\_Ginkgo 429 TS---PSKEKVMKHIYSDLEGEMHWSTNVCHAPENVH~~G~~NVH-LILRTSYLWVLSGGLYESGVVPFPLYKDQDQVNIQFPL  
51\_Physcomitrium 418 TS---PFKEKVQKIYSNLSGEMHWSKVQH~~S~~SEYIHSNVH-LLRKTGHILWLAGNFDKDNKFSFIFYQNQDKLDNKLPI

*T. thermophilus* 1251 -----  
*E. coli* 978 -----RNTCLKLIDFGR~~T~~KES  
0\_Nostoc 515 AETKLT~~T~~-----LHGGVVR~~L~~-----PEATPGK-----STREIEITASVVL~~D~~QATVTVQSS--QGRNN  
1\_Litchi 505 VERRYIS~~S~~LS---VNNDQVRHQLVSSDFSDN~~K~~--EDGISDY-SGFNR~~I~~IIGIGHCNLIHAAI~~L~~HENS~~D~~--LLAK--RRRNR  
2\_Arabidopsis 507 AERKS~~I~~SSLS---VNNDQVSQKFSSDFADP~~K~~--KLGI~~D~~YD-SELNGNLGTS~~H~~YNLIYSAIFHENS~~D~~--LLAK--RRRNR  
3\_Gossypium 505 AERRYIS~~R~~FS---VNNDQVRHNLFSSDFSD~~K~~K--EERI~~I~~YDY-SELNRIIGTGHCDFIYSAILHENS~~D~~--LLAK--RRRNR  
5\_Ricinus 509 IKRRYISS~~P~~SVNSVNNDQVKPKFSSDFSG~~K~~K--PSRI~~P~~Y-SELNRIVCTGHCNLIYPAILYENS~~D~~--LLAK--RRRNR  
6\_Rosa 505 VEGRYFSS~~L~~---VNNDQVRHKLFGNLNLSG~~K~~K--ESCI~~P~~DY-SELNRIIYTSHCNLIYFPPIR~~H~~DN-F--LLTK--RRRNR  
9\_Cucumis 505 VERRYIS~~S~~LS---VNNDKVQKFGY~~P~~DLSG~~N~~--ESGI~~P~~DY-SELNPI~~L~~CTGQSNLTYP~~A~~IFHGNS~~D~~--LLAK--RRRNR  
11\_Nicotiana 505 GKRRYTSN~~L~~S---VTNDQARQKLFSSDFSG~~K~~K--EDRI~~P~~DY-SDLNRIICAGQYNLYSPILHENS~~D~~--LLSK--RRRNR  
13\_Syringa 509 VKRRYTSN~~L~~S---GTNDPERQKLFSSYFYGKKKXED~~R~~ISDY-SDLNRIICNGRCNLIYPTILH~~Q~~NSD--LFSK--RRRNR  
18\_Liquidambar 509 VERRYISN~~L~~S---VTNDQVRHKLFGSDPSS~~K~~K--EGRI~~P~~DY-SELNRIICSGHCNLIYPAILHENS~~D~~--LLAK--RRRNR  
19\_Papaver 505 AKQRYTPS~~L~~S---VTNDQVKQKFCSS~~E~~SSGTG--GRGV~~L~~DY-SGPDRIICNGHCNFIYPPILHENS~~D~~--LLAK--RRRNR  
20\_Ananas 504 VEGRYISN~~P~~S---MTNDQVRHKLFGSDPSS~~K~~K--KERI~~L~~DY-SGPDRIISNGHWNFLYPAILHENS~~D~~--LLAK--RRRNR  
28\_Liriodendron 508 VERRYISD~~L~~S---VTNDRVRHKLFGSDPSS~~K~~K--KERI~~L~~DY-SGPDRIISNGHWNFLYPAILHENS~~D~~--LLAK--RRRNR  
30\_Magnolia 508 VQERSISD~~F~~S---VNNNRVKHKLFGSDPLA~~R~~K--GRRISDYAAGLERVISNGDGFYPAI~~L~~RENSY--LLAK--RRRNR  
32\_Nymphaea 508 AEGKNISSRVNTVNNDQVGKGFSSDFSG~~K~~K--ESTI~~P~~DY-SEFNRIIDRDHWNLIYFPSILHKNYDLFL~~L~~AK--RRRNR  
33\_Amborella 505 AKHQSLFDSY---V--DQVEHRS~~G~~SDSN~~C~~Y~~G~~KE--EQI~~F~~SY-SETDRTISNEHRDSIYVTLSPK~~N~~YN--MKGK--RQ~~M~~NR  
44\_Ginkgo 505 AKHKS~~L~~SDS---VNQDRVKHKSVD~~S~~NFSG~~K~~E--EKIS~~G~~Y-SGIDRIMSNEHWDSTY~~S~~TPFNCKN--ILGK--KQ~~R~~NR  
51\_Physcomitrium 494 AKQ-----TLNY-FQ~~L~~KEHFLNNFWNSIYSSII~~L~~YNYR--FLEK--K-~~N~~NK

*T. thermophilus* 1251 -----  
*E. coli* 995 YKVPY~~G~~-----AV-----  
0\_Nostoc 566 YLVSTGNNQVFN-----LRATPGTKVQNGQV~~A~~ELIDDRYRTT~~T~~G~~F~~LK~~F~~AGVEVQKKG~~K~~A-----  
1\_Litchi 575 FLIPFQSIQE~~Q~~EKELMPH--SGISIEIPIKGVFRKNSIFAYFDDPRYRRKNSG~~I~~TKYGTIGAH~~S~~IVKKEDLIEYRG~~G~~GK  
2\_Arabidopsis 577 FLIPFQSIQE~~Q~~EKEFIPQ--SGISVEIPINGIFRRNSIFA~~F~~FDDPRYRRKSSG~~I~~LKYGT~~L~~KADSI~~I~~QKEDMIEYRG--VQ  
3\_Gossypium 575 FIIPFQLIQ~~Q~~EKELMLHSHSGISMEIPINGIFRRKSILAFDDPRYRRKSSG~~I~~TKYGT~~L~~GAHSIVKKEDLIEYRG--VK  
5\_Ricinus 582 FIIPFQSIQE~~Q~~EKKLMTRS--SAISIEIPLNGIFRRNSVFA~~F~~FDDPYRRKSSG~~I~~TKYGAIGVHSIVKKEDLIEYRG--VK  
6\_Rosa 574 FIIPFQSIQE~~Q~~EKERMPR--PDISIEIPINGIFRRNSILAYFDDPYRRKSSG~~I~~TKYGT~~V~~GLHSILKKEDLIEYRG--VK  
9\_Cucumis 575 FIIQFESLQEREKELRPP--SGISIEIPINGLFRNSILAFDDPYRRN~~S~~SSG~~I~~TKYGTIGVHSILKKEDLIEYRG--VK  
11\_Nicotiana 575 FIIPLHSIQELENELMPC--SGISIEIPVNGIFRRNSILAYFDDPRYRRKSSG~~I~~IKYGTIVETHSIVKKEDLIEYRG--VK  
13\_Syringa 581 FIIPLQSIQERENELMPR--SGISIEIPNGIFRRNSILAYFDDPRYRRKSSG~~I~~TKYGTIEMHSIVKKEDLIEYRG--VK  
18\_Liquidambar 579 FIIPFQSIQEREKEQM~~P~~HSNSGISIEIPINGIFRRNSILAYFDDPRYRRKSSG~~I~~TKYGTIEVHSIVKKEDLIECRG--VK  
19\_Papaver 575 LIIPFQSNQERDKERIP--SGISIEIPINGIFRRNSILAYFDDPRYRRN~~S~~SSG~~I~~TKYETLEMHSIVKKEDFIEYRR--AK  
20\_Ananas 572 FIIPFQYDQEREKELIPC--FGISIEIPINGILRRNSILAYFDDPRYRRSSG~~I~~TKYGTIEVHSIVKKEDLIEYRG--AK  
28\_Liriodendron 578 FIIPFQYDQEREKELMPR--SGISIEIPINGILRRD~~I~~LAYFDDPRYRRSSG~~I~~TKYGTIEVDSIVKKEDLIEYRG--AK  
30\_Magnolia 578 FIIPFQYDQEREKELMPR--SGISIEIPINGILRRNSILAYFDDPRYRRSSG~~I~~TKYGTIEVDSIVKKEDLIEYRG--AK  
32\_Nymphaea 579 FIIPFQYDPEREKELTPHSS~~T~~ITVEIPANGILRRNSILAYFDDPRYRRSSG~~I~~TKYGTIEVDSIVKKEGLIEYRR--PK  
33\_Amborella 580 FIIPFQWIQERENELMLR--SSISIEIPINGIFRRNSILAYFDDPYRRKSSG~~I~~TKYGAIGLHSIFKKEDLIEYVG--IK  
35\_Picea 587 FIVPLQCDKEWGR~~I~~ISF--PDAILRIPKSGVLQRNSIF~~G~~Y-----  
44\_Ginkgo 574 LIVPLRYDKEREKRRIPC--PNSILRIPRNL~~F~~QRNHILAVLDDPQYRVDSSG~~I~~LKYGNIR~~R~~DSIEKKDDFLEDQ~~G~~--SR  
51\_Physcomitrium 534 -----YEK~~L~~L---LFQFMLKL~~P~~KNIGILKQND~~I~~FAIFNDPKYRIKNSG~~I~~IKYGNIKVDL~~I~~NKKNDIFEDQK--TK



*T. thermophilus* 1251 -----  
*E. coli* 1003 -----  
0\_Nostoc 622 --KLGYEV-VQGGTLLWIP~~EE~~THEVNKD-ISLLLVEDGQFVEAGTEVVK--DIFCQNSGVI~~EV~~TQKNDILREVVVKPGEL  
1\_Litchi 653 KIKPKYQ--MKVDRFFFIPEEVHTLPES--SYVMVRNNSLIGVDTRITL--NRRSQVGGLVVRVERKKKR--IELKIFSGDI  
2\_Arabidopsis 653 KIKTKYE--MKVDRFFFIPEEVHILPES--SAIMVQNYISIIGVDTRLTL--NIRSQVGGLI~~RV~~EKKKKR--IELKIFSGDI  
3\_Gossypium 653 KVKPKYQ--MKVDRFFFIPEEVHILSES--SSIMVRNNSIIGVDTPITL--NTRSQVGGLVVRVERKKKR--IELKIFSGNI  
5\_Ricinus 659 EFKPKYQ--MKVDRFFFIPEEVYILPES--SSLMVRNNSIIGVDTPITL--NTRS~~RV~~VGGLVVRVERKKK~~B~~--IELKIFSGDI  
6\_Rosa 650 EFKPKYQ--TKVDRFFFIPEEVHILPES--SSIMVRNNSIIGIDTRITL--NTRS~~RV~~VGGLV~~RI~~EKKKKR--IELKIFSGDI  
9\_Cucumis 651 DFKPKYQMKVDRFFFIPEEVHILPES--SSIMVRNNSIIGVATRLTL--SIRS~~RV~~VGGLV~~RV~~EKKKKR--IELKIFSGDI  
11\_Nicotiana 651 EFRPKYQ--MKVDRFFFIPEEVHILPGS--SSIMVRNNSIIGVDQITL--NL~~RS~~RVGGLVVRVERKKKR--IELKIFSGDI  
13\_Syringa 657 AFRPKYQ--MKVDRFFFIPEEVHILPGS--SSIMVRNNSLIGVDQITL--NIRS~~RV~~GGFVRVERKKKR--IELQIFSGDI  
18\_Liquidambar 657 EFKPRYQ--MKVDRFFFIPEEAHILPGS--SSIMVRNNSIIGVDQITL--NTRS~~RV~~VGGLVVRVERKKKR--IELKIFSGDI  
19\_Papaver 651 EFRQKYQ--KKVDRFFFIPEEVHILSGS--SSIMVRNNSIIGIDTRITL--NIRS~~RV~~VGGLVVRVERKKKR--IELKIFSGDI  
20\_Ananas 648 EFSPKYQ--TEVDQFFFI~~EE~~VHILPGS--SLIMVRNNSIIGVDTRLALNI~~N~~TRS~~RV~~RGGLVVRVERKKKY--IELKIFSGDI  
28\_Liriodendron 654 EFRPKYQ--MKVDRFFFIPEEVHILPGS--SPIMVRNNSIIGVDTRIAL--NTRS~~RV~~VGGLVVRVERKKK~~B~~--IELKIFSGDI  
30\_Magnolia 654 EFRPKYQ--MKVDRFFFIPEEVHILPGS--SSIMVRNNSIIGVDTRIAL--NTRS~~RV~~VGGLVVRVERKKKR--IELKIFSGDI  
32\_Nymphaea 657 ESRPKYQ--MKVDRFFVIPEEVHILPES--SSIMVRNNSIIGVDTRITF--NTRSQIGGLV~~RI~~EKKKK~~B~~--IELKIFSGGI  
33\_Amborella 656 ELKPKYQTKYYWNKYT-----NHF-----KYKPSRRIGPSGEKKKR--IELKIFSGEI  
35\_Picea 626 -----  
44\_Ginkgo 650 GSRPKYE--IEGGRFLFIPEEVHILHES--SSIMVRNNSIIRTGTQITF--NIESQVGGLV~~RI~~ERMKK~~B~~--IEVRILPGDI  
51\_Physcomitrium 598 TVRPRYKI-LKEGNFFLPEEVYILDQSSFSILVKNNSFIKAGTKITF--NISSKITGFVKIKKKFNN-FKIKILPGSI

*T. thermophilus* 1251 -----  
*E. coli* 1003 -----  
0\_Nostoc 696 LMVDDPEAVMGRDNTFVQPGEEFQGT-----VATELRYIQYVE-TPEGPALLSRPVVEFAVPNNPDVPSTTS---V  
1\_Litchi 726 HFPGEADKISRHS~~GIL~~IPPETGKKKLKESTGESKKLK~~KWI~~YVQRITLTKKKYFVLVRPVV~~TYE~~IAAD---GINLATLFPQD  
2\_Arabidopsis 726 HFPDKTDKISRHS~~GIL~~IPPGRGKKNSK---ESKKFKNWIYVQRITPTKKK~~FV~~LVRPVATYEIAAD---SINLATLFPQD  
3\_Gossypium 726 YFPGERDKISRHS~~GIL~~IPPGTGKTNSK---ESKKLKNWIYVQRITPTKKKYFVLVRPVTPYEIPD---GLNLATLFPQD  
5\_Ricinus 732 HFPGETDKISRHS~~GIL~~IPPGMVKTNSK---ESKKQKNWIYQRIAPT~~RKKY~~FVLVRLV~~II~~YEIAN---GINLETLPFD  
6\_Rosa 723 HFPGE~~MDKI~~FRHNGILIPPGT---NSK---ESKKRN~~NWI~~YVQWITPTKKKYFVLVRPV~~TYE~~IAAD---GINLATLFPQD  
9\_Cucumis 726 HFPGE~~MDKI~~SRHNGILIPPERVKKNSK---KSKSKNWIYVQWITPTKKKYFVVRPV~~TYE~~IAAD---GINLVKLFPQD  
11\_Nicotiana 724 HFPGETDKISR~~H~~TGV~~L~~IPPGTGK~~R~~NSK---ESKKVKNWIYVQRITP~~SKKK~~FVLVRPV~~TYE~~ITD---GINLATLFPD  
13\_Syringa 730 HFPGETDKISRHS~~G~~V~~L~~IPPGTGK~~R~~NSK---ESKKLKNWIYVQRITP~~SKKKY~~FVLVRPV~~TYE~~ITD---GINLVTLFPD  
18\_Liquidambar 730 HFPGET~~MDKI~~ARHS~~GIL~~IPPGTGK~~T~~NSK---ESKKLKNWIYVQRITPTKKKH~~FV~~LVRPV~~TYE~~IAAD---GINLATLFPQD  
19\_Papaver 724 HFPGETDKIS~~W~~HSGILIPPGTGKKNAG---DSKKLKNWIYVQRITP~~IKKK~~FVLVRPV~~TYE~~IAAD---GINLATLFPD  
20\_Ananas 723 HFPGETDKISRHS~~G~~IFIPPETEKKNSK---ESKKWKNWIYVQRITPTKKKYFVSVRPV~~TYE~~ISD---GINLATLFPD  
28\_Liriodendron 727 HFPGETDKISRHS~~GIL~~IPPGTGKKNNSK---ESKKWKNWIYVQRITPTKKKYFVSVRPV~~TYE~~IAAD---GINLGTLPQD  
30\_Magnolia 727 HFTGETDKISRHS~~GIL~~IPPGTGKKNNSK---ESKKWKNWIYVQRITPTKKKYFVSVRPV~~TYE~~IAAD---GINLGTLPQD  
32\_Nymphaea 730 HFPGETDKISR~~H~~IGILIPPGARKKMDKGSQGNWEGKNW~~VY~~QRITP~~IKKKY~~FVSVRPV~~TYE~~IAAD---GINLVTLFPD  
33\_Amborella 703 QFPVEMDKI~~FR~~HSGILIPPGRVKKKIK---ESKKLKNWIYVQWITPTKKKYFVLVRPV~~TYE~~IAAD---GINLETLPQD  
35\_Picea 626 -----SNVEYGIPD---GPIMATSFSLD  
44\_Ginkgo 723 YFPGE~~IHE~~ISRHN~~GT~~LIPPGKIIFD-----EFQSVNWIYFQWITPHKEKPFV~~VP~~RAAEYGIHD---GSNRTAPFVLD  
51\_Physcomitrium 674 YYPKEKQKNFKQNGILIPPGKIF-----EQFRAKNWIYLEWIVLSKDNSFFLIRPAIEYKIFNDNPLTLPFVLD

*T. thermophilus* 1251 -----  
*E. coli* 1003 -----  
0\_Nostoc 763 SQTGRS~~IQL~~RAVQRLPYKDSERVKSVE--GV~~ELL~~RQT~~LVLE~~IEQEGEQQDHNASPLA~~AD~~IELVQDTEDEPQ~~RL~~QLVIL  
1\_Litchi 803 PLREKDNMQLRVVNYILYGNKPKTRGISDTSIQLV~~RT~~CLVLNWDQDKKS--SSAE~~EV~~RTSFVEVSTNGMIRDFLRIDL~~V~~QS  
2\_Arabidopsis 799 LFREKDN~~IQL~~RVFN~~YIL~~YGN~~GK~~PIRGISDTSIQLV~~RT~~CLVLNWDKN---SSLEEVRAFFVEVSTKGLIQDFRIGLVKS  
3\_Gossypium 799 PFQEKDNMQLRAVNYILYGNKPKTRIGISDTSIQLV~~RT~~CLVLSWDQDNKS--SFAEEVCA~~SF~~VEVSTGLIRDFLRIDL~~V~~KS  
5\_Ricinus 805 LLQEKDN~~LK~~LRVVNYILSGNGKPIRGISDTSIQLV~~RT~~CLVLNWDQEKKS--SIEEARAS~~FVE~~VNTGLIRDFLRINLVKS  
6\_Rosa 793 PLRE~~RDN~~LELRVVNYILYGNKPIRGISGTSIQLV~~RT~~CLL~~NWD~~KNKS--SSIEEA~~HA~~SFVEVSANGLIQDFLRINLVKS  
9\_Cucumis 799 LLQERDNLELRVVNYILYGNKPIRGISGTSIQLV~~RT~~CLL~~NWD~~RDKKS--SSIEDARAS~~FVE~~VSTGLVRN~~FL~~RIDLGKS  
11\_Nicotiana 797 PLQERDNVQLRIVNYILYGNKPIRGISDTSIQLV~~RT~~CLVLNWDQDKKS--SC~~EE~~ARAS~~FVE~~IRTNGLIRHFLRINLVKS  
13\_Syringa 803 LLQERDNVQLRVVNYILYGNKPIRGISD~~TD~~IQLV~~RT~~CLVLNWDQDKKSSS~~EE~~ARAS~~FVE~~IRTNGLIRHFLRIDL~~V~~KS  
18\_Liquidambar 803 LLQERDNMQLRVVNYILYGNKPIRGISDTSIQLV~~RT~~CLVLNWDQDKKSA--SSGEA~~HA~~SFVEVRTNGLIRN~~FL~~RINLVES  
19\_Papaver 797 LLQERDNVQLRVVNYILYGNKPIRG~~IY~~HTSIQLV~~RT~~CLVLNWDQEKKG--SSIEEVQAS~~FVE~~VRVNNLIRYFIRMDLVKS  
20\_Ananas 796 LLQEKDNVQLRVVNYILYGNKPIRGISGTSIQLV~~RT~~CLVLNWDQEQNG--FIEEV~~HA~~SFVEVSTGLIRDFLRIDL~~V~~KS  
28\_Liriodendron 800 LLQERDNVQLRVVNYILYGNKPIRG~~IY~~HTSIQLV~~RT~~CLVLNWDQDRNG--SIEEV~~HA~~SFVEVG~~TND~~LIRDFRIDL~~V~~KS  
30\_Magnolia 800 LLQERDNVQLRVVNYILYGNKPIRG~~IY~~HTSIQLV~~RT~~CLVLNWDQDRNG--SIEEV~~HA~~SFVEVGANDLIRDFRIDL~~V~~KS  
32\_Nymphaea 807 MLQEKDN~~LR~~QLVVNYILYGDGKPIRGISHTSIQLV~~RT~~CLVLNWDQDKG--SIEKVQASSA~~EV~~RANDLIRYFIRIDL~~V~~KS  
33\_Amborella 776 LLQEKDNLELRVVNYILYGNKPIRGISGTSIQLV~~RT~~CLVLNWDQDNKS--SS~~EE~~AAHYFVEVSTGLIRDFLRINLVKS  
35\_Picea 646 LSREGDN~~LQ~~IQVSNSSSYEDGERIQVMSDTSIPLVQ~~TCL~~GFDWEQIDS---IESEAYASLTSVRTN~~KIV~~SNMIQISL~~IKY~~  
44\_Ginkgo 793 LLGEEDN~~LQ~~VQVGN~~YIL~~YGDGEQIQV~~IS~~DTSIQLV~~RT~~CSVLNWEQKDS---ME-EAYAF~~LT~~EV~~RI~~NEVVRN~~FL~~QISL~~MKY~~  
51\_Physcomitrium 747 LLKEQKKIKIQTKYILYEDSEEV~~IE~~INPD~~TD~~IQLIQ~~TCL~~LNWETK---VF~~IK~~EAHIS~~FI~~KIRINK~~IK~~INFFQINLIEN

*T. thermophilus* 1251 -----  
*E. coli* 1043 GQTITR-QTDE--LTG-----LSSLVLDSAERT-  
0\_Nostoc 841 ESLVIRRDITADATQG-----STQTTLEVQDGLTIAPGSVVARTQILSKEGGIVRGVQKGTENVRRCLVLRRET----  
1\_Litchi 882 HISYMR-KRNDPSSSG--LISDNGSDRTNINP--FYSLYF--KARVQQSLSQNQRTLHTLLNRNKKCQSLIILSSSNCFR  
2\_Arabidopsis 875 HISYIR-KRNNSPDGLI-----SADHMNP--FYSISPK-SGILQQSLRQNHGTIRMFLNRNKEQSLIILSSSNCFR  
3\_Gossypium 878 HIFYIR-KRNDPSGSE--LISDNRSDRTNKNP--FYSIYS--NARIQQSFQNHGTIHTLLNRNKEQSLIILSASNCFR  
5\_Ricinus 884 HISYISRKNDPSGSG--PISNNGANHNTNINP--FYPIYF--KTRIQQSLKQNGGTISTLLNRNKEQSLIILSSSNCFR  
6\_Rosa 872 HTSYIR-KRNDPLGSG--LISDNRSDRTNINP--FYSIYS--KERTIQQSLRQNGGTFTLLNRNKEQSLIILSSSYNCFQ  
9\_Cucumis 878 DTAYMR-KRNDPSGSG--LIFNNESDRTNINP--FSSIYS--KTRVPQSPSQNGGTIRTLFNRNKEQSLIILSASNCLQ  
11\_Nicotiana 876 PISYIG-KRNDPSGSG--LLSDNGSDCTNINP--FSSIYS--KARIQHSNLNQGTTHTLLNRNKEQSLIILSASNCFR  
13\_Syringa 883 PISYIG-KRNNPSGSG--LLSDNGSDCTNINP--FSSIYS--KARIQHSNLNQGTTHTLLNRNKEQSLIILSSSNCFR  
18\_Liquidambar 882 PISYTG-KRNDPSGSG--WISDNGSDRTNINP--FYSTYS--KERTIQQSLSQNGGTIRTLNLRNKEQSLRILSSSNCFR  
19\_Papaver 876 PILYTR-KRNDRGAGLIWIPDNGSDRTNINP--FSF--SSKARIQFTTQHGGTIRALVNRNKEQSLIILSSSNCFR  
20\_Ananas 874 TISYTG-KRYDRASSG--LIPDNGLDRTNINP--FYSKAK-----IQSLSQHGGTIGTLLNRNKEQSLIILSSSNCFR  
28\_Liriodendron 878 PISYIG-KRDDTTGSG--LIPDNESDRTNINT--FYSKT-----R-IQSLTQHGGTIRTLNLRNKEQSLIILSSSDCSR  
30\_Magnolia 878 PISYIG-KRNDTAGSG--LIPDNESDRTNINT--FYSKT-----R-IQSLTQHGGTICTFLNRNKEQSLIILSSSDCSR  
32\_Nymphaea 885 PILYTG-KRNDGSGS--VIPDTGSCANTNL--FSSKVK-----MKSLSQHGGTVRTFLNRNKEQSLIIVFSSSNCFR  
33\_Amborella 855 NICYIR-KRNDPLGSG--LISDNRSDCT--NP--FYSIYS--KEKIQQSLRQNGGTIHTLLNRNKEQSLIILSSSNCFR  
35\_Picea 723 PLFVGR-RDNKASSN--LMFHNKLDHT--NL--FYSN-----GERQLSKHQSGLYNGEEDSGSFMYLSPSDCFR  
44\_Ginkgo 869 PG---GK-RKNVTGSK--FLFHNRSQDT--NT--FSSN-----RGSQFFSKHGGTIRTLNPEEKGGSFAVLSPSDCFR  
51\_Physcomitrium 823 INLMNKK-KNNIILN--YLFKKKR-----YII-NQKDCEKILLLSKTWGIIRTPSNKNQESFFILSPFNLFQ

*T. thermophilus* 1251 -----  
*E. coli* 1069 -----AG  
0\_Nostoc 909 -----DLITVNTSTQPKVKM--  
1\_Litchi 955 MGPFNDI-KYHNVIKQSIHI-----QKGSLLPIRNSLGLGT-VLQIANFYSFY--LITYNQISVT--KYWK  
2\_Arabidopsis 944 MGPFNHV-KHHNVINQSI-----KKNLTITIKNSSGPLGT-ATPISNFSYFLP--LLTYNQISLI--KYFQ  
3\_Gossypium 951 MGPFNDV-KYHNVIKQSI-----KKDPLIPIKNSLGLGT-APKIANFYSFYP-LITHNQTSVA--KYFE  
5\_Ricinus 958 MDPFNDV-KHHNVIKESI-----KRDPPIRNSLGLGT-ALQIANLYLFYHLNLITHNRISVT--KYLK  
6\_Rosa 945 MSPFNDV-KYYDGIKESIKR-----DRDSLIIQITNLLGLGT-ASQIDLFSFYHL--LTHNHISVTKYFYLQ  
9\_Cucumis 951 MDLFNDVKDY-NVIKESS-----KKDPLISIRNSLGLGA-APQIVNFYSFYD--SITHNPISLT--KYLQ  
11\_Nicotiana 951 MGPFKDV-KYHSVIKESI-----KKDPLIPIRNSLGLGT-SLPINFSYF--LITHNQILVT--NYLQ  
13\_Syringa 956 MGPFNDVIKYHNVIKESIKI-----TKDPLIPLKNSLGLPGT-AFTIANFYSFYH--LITHNQILVN--NYLQ  
18\_Liquidambar 955 MGPFNDV-KYHNVIKESI-----KRDPPIRNSLGLGT-ALQIANFYSFYH--LITHNKILVT--KYLQ  
19\_Papaver 950 MGPFNSVKYNDGVTKEST-----KRDLRISILNSLGLGI-VPKFVNF--SYHLITHNQILVK--KYLQ  
20\_Ananas 943 IGPFNSS-KYNNLTN-----ESDPLIPIRNSLGLGAIVPKIANFYSFYH--LITHNQIVLK--KYLQ  
28\_Liriodendron 947 IGPFNSS-KSHKVTKESI-----KEDPMIPIRNSLGLGT-VPKIANFYSFY--LITHNQILN--KYLQ  
30\_Magnolia 947 IGPFNSS-KSHKVTKESI-----KEDPMIPIRNSLGLGT-VSKIANFYSFY--LITHNQILN--KYLQ  
32\_Nymphaea 953 IN---VSKYHNVTKEISIKE-----KEDTPISILNLLGLGT-VPKIHNFSPSYH--SITHNEIILNKYLILD  
33\_Amborella 926 MSPFKDV-QYSNGIKESI-----KVEPLIPIRNSLGLGT-SSQIENFY--LTKTHNQISVT--KYLQ  
35\_Picea 790 IVLFNDSKCYDTV-NKSN-----REDPMRKIEFSGLLGHLH-SITNRFPS--HFLTYKKVLSKKHS--I  
44\_Ginkgo 933 TVLFSGSKYDTV-KRSI-----QEDPMQIIEISGLLGNLH-SIANRFPSP--HLITYNKVLSNKH--I  
51\_Physcomitrium 889 TILFDKTKQNLKIENNVEKLFTYEPKKIKFTNIEKRKNFVEFLGLGLGYN--ITKSFQLFCKKFSKSI---PINFSI

*T. thermophilus* 1251 -----  
*E. coli* 1071 GKDLRPALKIV-----DAQG-----  
0\_Nostoc 924 GDLLVAGT---EVATGIFTEESGQVTNVK-----KLG-VKSEELGV  
1\_Litchi 1017 LDNLKQTFQIC---KFYLMDENGRIYNPDPSKIVLNPFNLNWFYFLHH-----NYCEE--MSTIISLGQFICENVCI  
2\_Arabidopsis 1004 LDNLKYIFQKI---NSYLDENGIIINLDPSYNNVLPNFKLNWYFLHQNYHHNYCEE---E--TSTIISLGQFFCENVCI  
3\_Gossypium 1012 LDNLKQAFQVL---NYYLIAENGRIYNFDPGRNIFLNAVNLNWFYFHHHHYH---NYCEE--TSTIISLGQFICENVCI  
5\_Ricinus 1020 LDNLKQTFRVL---KYLLMDENGRIYNPDPCSNVLPNPFNLNWFYFLHHNYHHNYCHNYCEE--SFTIISLGQFICENVCM  
6\_Rosa 1009 LDNLKQTFQVF---KYLLMDENGRISSDPCSSILNPFNLNWHFLDH-----NYCEE--TSTIISLGQFICENLCI  
9\_Cucumis 1011 LDNLKQTFQVL---KYLLMDENGRIISDPCSNIVFNTFNLNWHFLHHNYHHNYCEEET--P--TRTRISLGHFFENVCI  
11\_Nicotiana 1011 LDNLKQTFQVIK-FKYLLMDENGRIINPDPCRNIIINPFNLNWFYFLHH-----NYCEE--TSKIISLGQFICENVCI  
13\_Syringa 1019 LDNLKQTFQVI---KYLLMDENEKIYNPEPGRNIIINPFNLNWFYFLHH-----NYCQE--TSTIISLGQFICENVCI  
18\_Liquidambar 1015 LDNLKQTFQVL---NYYLMDENGRIYNPDPCSNIIINPFNLNWFYFLHH-----NYCEE--TSTIISLGQFICENVCI  
19\_Papaver 1010 LDNLKQTFTF-QGLKYLLDETGRINPNLGSIIINLPNLFNWFYFLQH-----DYCEE--RATIIINLGQFICENVCI  
20\_Ananas 1001 LDNLKQIFQVLQVLKYCLIDENRIYNPDPCSNIIINPFNLNWFYFLHH-----DYCEE--TSTKISLGQFICENVCL  
28\_Liriodendron 1007 LDNLKQTFQVL---KYLLMDENGRIYNPNLHSNIIINPFNLNWFYFLRH-----DYCEE--TSTIISLGQFICENVCI  
30\_Magnolia 1007 LDNLKQTSQVL---KYLLMDENGRIYNPDPRSNIINPFNLNWFYFLRH-----DYCEE--TSTIISLGQFICENVCI  
32\_Nymphaea 1014 NNNPKQTFQLL---KYFLVDENGRIISNANPCSDIIFNLFGS--CFLPH-----DYCKGTS--TTRIISLGQFICENVCL  
33\_Amborella 984 LDNFQTFQVL---QYYLMDENGIIVNSDPCSNTRNPFNLNWHFFHNNYDNNYQK-----KSPISLGRFFCENVCI  
35\_Picea 850 FHN---SFNTFQVPKYFMDENTRISHFDPGRNIIISNLLGPNWCSSSS-----EFCKK--IFPVVSPGQLIPESVCI  
44\_Ginkgo 993 SDN---SGKVSQVSKCYFMGGNTGILNFDSCRNIIFNLNFWCSPLS-----NFCKK--KLPAVSLGQLIRESVCI  
51\_Physcomitrium 965 IDNLKKKIK---ISKWFFLNENKKVQKFFLTQNTILSL--LNWSFPIF-----DLAKK--KTQLFNLGHFFCDGLSI

## β' b9: D1251-V1281

|                        |      |                                                                                  |
|------------------------|------|----------------------------------------------------------------------------------|
| <i>T. thermophilus</i> | 1251 | -----DITQGLPRVIELFEARR                                                           |
| <i>E. coli</i>         | 1086 | -----NDVLI-----PGTDMPAQYFLPGKAIVQLEDGVQISSGDTLARIPQESGGTKDITGGLPRVADLFEARR       |
| 0_Nostoc               | 961  | NSETPNSS-----LQ-TQNYAITIRLGRPYRVSPGAVLQIEDGDLVQRGDNLVLLVFERAKTGDIIQGLPRIEELLEARK |
| 1_Litchi               | 1084 | ATNGPHLK-SGQVLIVQ-VGSVVIRSAKPYLATPGATVHGHYGEILYEGDTLVTFIYEKSRSGDITQGLPKVEQVLEVR  |
| 2_Arabidopsis          | 1075 | AKKEPHLK-SGQVLIVQ-RDSAVIRSAKPYLATPGAKVHGHYSEILYEGDTLVTFIYEKSRSGDITQGLPKVEQVLEVR  |
| 3_Gossypium            | 1083 | AKSGPRLK-SGQVFIQ-ADSVIRSAKPYLATPGATVHGHYGETLYEGDTLVTFIYEKSRSGDITQGLPKVEQVLEVR    |
| 5_Ricinus              | 1095 | AKNGPHLK-SGQVIIH-IGSVVIRSAKPYLATPGATVHGHYGEILYEGDTLVTFIYEKSRSGDITQGLPKVEQVLEVR   |
| 6_Rosa                 | 1076 | AKKGSPLK-SGQVIVQ-LDSLIRSAKPYLATPGATVHGHYGEILSEGDTLVTFIYEKSRSGDITQGLPKVEQVLEVR    |
| 9_Cucumis              | 1084 | AKNRPHLK-SGQIIIVE-LDSVVIRSAKPYLATPGATVHRHYGEMLYEGDTLVTFIYEKSRSGDITQGLPKVEQVLEVR  |
| 11_Nicotiana           | 1080 | AKNGPPLK-SGQVILVQ-VDSVIRSAKPYLATPGATVHGHYGETLYEGDTLVTFIYEKSRSGDITQGLPKVEQVLEVR   |
| 13_Syringa             | 1086 | AKNTPHLK-SGQVILVQ-VDSVVIRSAKPYLATPGATVHGHYGEILYEGDTLVTFIYEKSRSGDITQGLPKVEQVLEVR  |
| 18_Liquidambar         | 1082 | AKNGPHLK-SGQVLIVQ-VDSVVIRSAKPYLATPGATVHGHYGEILYEGDTLVTFIYEKSRSGDITQGLPKVEQVLEVR  |
| 19_Papaver             | 1079 | SKYGPRLK-AGQVLIIR-VGSLVIRSAKPYLATPGATVHGHYGETLSEGDTLVTFIYEKSRSGDITQGLPKVEQVLEVR  |
| 20_Ananas              | 1071 | FKEYEPHVKKSGQILIVN-VDSLIRSAKPYLATPGATVHGHYGKILYEGDTLVTFIYEKSRSGDITQGLPKVEQVLEVR  |
| 28_Liriodendron        | 1074 | SKYGPPIK-SGQVLIVH-VDSLIRSAKPYLATPGATVHGHYGEILSEGDTLVTFIYEKSRSGDITQGLPKVEQVLEVR   |
| 32_Magnolia            | 1074 | SKYGPPIK-SGQVLIVH-VDSLIRSAKPYLATPGATVHGHYGEILYEGDTLVTFIYEKSRSGDITQGLPKVEQVLEVR   |
| 32_Nymphaea            | 1081 | SKHRPIK-SGQVIMVY-LDSFIIIRSAKPYLATPGATVHGHDYGEIFYEGDTLVTFIYEKSRSGDITQGLPKVEQVLEVR |
| 33_Amborella           | 1055 | VKHGPHLK-SGQVIVQ-IDSVIRSAKPYLATPGATVHGHYGEILSEGDTLVTFIYEKSRSGDITQGLPKVEQVLEVR    |
| 35_Picea               | 917  | SEDEPLPE-SGQIIIVD-EESLVIRSAKPYLATRKATVHGHYGEIDKGDTLITLIYERFSSDIIQGLPKVEQLSEARL   |
| 44_Ginkgo              | 1060 | SEDKPLSG-SGQIIIVH-EEVLIRSAKPYLATRAAVHGHYGEFLDEGDTLITLIYERBSKSGDITQGLPKVEQLSEARS  |
| 51_Physcomitrium       | 1030 | AEYPTFSE-SGQIIATYDDLVLIRLAKPYLATGGATIHNNYGEIVKEGDLITLIYERLKSDDIIQGLPKVEQLLEARL   |

## β' b9: D1251-V1281

## β' b10: V1313-N1404

|                        |      |                                                                                 |
|------------------------|------|---------------------------------------------------------------------------------|
| <i>T. thermophilus</i> | 1268 | PKAKAVISEIDGVVRIET--EEKLSV-FVE-S-EGFSKEYKLPKEARLLVKDGDYVEAGQPLTRGAIDPHQLLEAKGP- |
| <i>E. coli</i>         | 1150 | PKEPAIIAEISGIVSFGKE--TKGKRRLVITPVDGSDPYEEMIPKWRQLNVFEGERVERGDVISDGPAPHDILRLRGV- |
| 0_Nostoc               | 1035 | PKEACILARRAGEVKVYVGDGEAIAIKVV--ESNGVVTVDPLGPGQNLIVPDGSHISAGQPLTDGSPNPHEILEIFFSL |
| 1_Litchi               | 1162 | IDSISMNLEKRV-----E-----GWN-----RITRIL                                           |
| 2_Arabidopsis          | 1153 | IDSISLNLEKRI-----K-----GWN-----CITRIL                                           |
| 3_Gossypium            | 1161 | IDSISMNLEKRI-----E-----GWNE-----CITRIL                                          |
| 5_Ricinus              | 1173 | IDSISLNLEKRV-----G-----GWNE-----CIPRIL                                          |
| 6_Rosa                 | 1154 | IDSISMNLEKRV-----E-----GWNE-----CITRIL                                          |
| 9_Cucumis              | 1162 | IDSISMSLEKRI-----E-----GWNE-----RITRIL                                          |
| 11_Nicotiana           | 1158 | VDSISMNLEKRI-----E-----GWN-----CITRIL                                           |
| 13_Syringa             | 1164 | IDSISMNLEKRV-----E-----GWNE-----RITRIL                                          |
| 18_Liquidambar         | 1160 | IDSISMNLEKRV-----E-----GWN-----RITRIL                                           |
| 19_Papaver             | 1157 | LDSISMNLEKRV-----E-----GWNE-----RITRIL                                          |
| 20_Ananas              | 1150 | IDSLSMNLEKRV-----E-----GWNE-----RIPRIL                                          |
| 28_Liriodendron        | 1152 | IDSISMNLEKRI-----E-----GWNE-----HITRIL                                          |
| 30_Magnolia            | 1152 | IDSISMNLEKRI-----E-----GWNE-----RITRIL                                          |
| 32_Nymphaea            | 1159 | IDSISMNLEKRV-----E-----GWNE-----HITGIL                                          |
| 33_Amborella           | 1133 | IDSISMNLEKRV-----E-----GWN-----LITRIL                                           |
| 35_Picea               | 995  | NNSISMNLKESF-----E-----NWTG-----DMTRFL                                          |
| 44_Ginkgo              | 1138 | INPIPRNLEESF-----E-----DWNE-----DMTRSL                                          |
| 51_Physcomitrium       | 1109 | TNPVSINLEKGF-----G-----EWNK-----DMTNFF                                          |

## β' a17: L1348-K1354

## β' a18: D1365-L1389

## β' a19: L1395-E1401

## β' b10: V1313-N1404

|                        |      |                                                                                    |
|------------------------|------|------------------------------------------------------------------------------------|
| <i>T. thermophilus</i> | 1342 | -----EAVERYLVEEIQKVYRAQGVKLHDKHIEIVVRQMMKYVEVTDPG-DSRLLEGQVLEKWDVEALNER            |
| <i>E. coli</i>         | 1227 | -----HAVTRYIVNEVDVYRLQGVKINDKHIEIVVRQMLRKATIVNAG-SSDFLEGEQVYESRVKIANRE             |
| 0_Nostoc               | 1113 | GSEDGVYACASHALQKVQTELVNEVQMVYQSQGIDISDKHIEIVVRQMTNKVRIDD-GGDTTMLPGELVLELRQVEQVNEA  |
| 1_Litchi               | 1185 | GIPWGFLIGAELTIVQSRISLVNKKIQKVYRSQGVQIHNHRHIEIIVRQITSKVLVSEDGMSNVFLPGELIGLLRAERTGRA |
| 2_Arabidopsis          | 1176 | GIPWGFLIGAELTIVQSRISLVNKKIQKVYRSQGVQIHNHRHIEIIVRQITSKVLVSEEGMSNVFLPGELIGLLRAERTGRA |
| 3_Gossypium            | 1184 | GIPWGFLIGAELTIVQSRISLVNKKIQKVYRSQGVQIHNHRHIEIIVRQITSKVLVSEDGMSNVFLPGELIGLLRAERTGRA |
| 5_Ricinus              | 1196 | GIPWGFLIGTELTIVQSRISLVNKKIQKVYRSQGVQIHNHRHIEIIVRQITSKVLVSEDGMSNVFSPGELIGLLRAERTGRA |
| 6_Rosa                 | 1177 | GIPWGFLIGAELTIAQSRISLVNKKIQKVYRSQGVQIHNHRHIEIIVRQITSKVLVSEDGMSNVFSPGELIGLLRAERTGRA |
| 9_Cucumis              | 1185 | GIPWGFLIGSELTIVQSRISLVNKKIQKVYRSQGVQIHNHRHIEIIVRQITSKVLVSEDGMSNVFSPGELIGLLRAERTGRA |
| 11_Nicotiana           | 1181 | GIPWGFLIGAELTIAQSRISLVNKKIQKVYRSQGVQIHNHRHIEIIVRQITSKVLVSEDGMSNVFSPGELIGLLRAERMGRA |
| 13_Syringa             | 1187 | GMPWGFLIGAELTIVQSRISLVNKKIQKVYRSQGVQIHNHRHIEIIVRQITSKVLVSEDGMSNVFSPGELIGLLRAERMGRA |
| 18_Liquidambar         | 1183 | GIPWGFLIGAELTIVQSRISLVNKKIQKVYRSQGVQIHNHRHIEIIVRQITSKVLVSEDGMSNVFSPGELIGLLRAERTGRA |
| 19_Papaver             | 1180 | GIPWGFLIGAELTIAQSRISLVNKKIQKVYRSQGVQIHNHRHIEIIVRQITSKVLVSEDGMSNVFSPGELIGLLRAERTGRA |
| 20_Ananas              | 1173 | GIPWGFLIGAELTIAQSCISLVNKKIQKVYRSQGVQIHNHRHIEIIVRQITSKVLVSEDGMSNVFSPGELIGLLRAERAGRA |
| 28_Liriodendron        | 1175 | GIPWGFLIGAELTIAQSRISLVNKKIQKVYRSQGVQIHNHRHIEIIVRQITSKVLVSEDGMSNVFSPGELIGLLRAERTGRA |
| 30_Magnolia            | 1175 | GIPWGFLIGAELTIAQSRISLVNKKIQKVYRSQGVQIHNHRHIEIIVRQITSKVLVSEDGMSNVFSPGELIGLLRAERTGRA |
| 32_Nymphaea            | 1182 | GIPWGFLIGAELTIAQSRISLVNKKIQKVYRSQGVQIHNHRHIEIIVRQITSKVLVSEDGMSNVFSPGELIGLLRAERAGRA |
| 33_Amborella           | 1156 | GIPWGFLIGAELTIVQSRISLVNKKIQKVYRSQGVQIHNHRHIEIIVRQITSKVLVSEDGMSNVFLPGELIGLLRAERTGRA |
| 35_Picea               | 1018 | GSWGLFISARITMEQSQIHLVNQIQKVYRSQGVRIYDKHIEIIVRQMTSKVLISEDGMANVFSPGELIGLSRAQRMDRA    |
| 44_Ginkgo              | 1161 | GSWGLFISARITMEQSQIHLVNQIQKVYRSQGVRIYDKHIEIIVRQMTSKVFIISDGMDVFSPGELIELSRAQRMNRA     |
| 51_Physcomitrium       | 1132 | GSWGLFISAQISMEQSQVNLVNQIQKVYRSQGVNISDKHIEIIVRQMTSKVFTLEDGTMNGFLPGELIEFARAKRMNRA    |

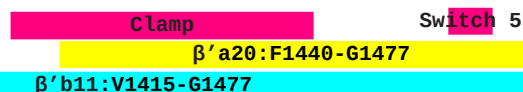

|                         |      |                                                                                                                                                |
|-------------------------|------|------------------------------------------------------------------------------------------------------------------------------------------------|
| <i>T. thermophilus</i>  | 1407 | LIAEGKTPVAWKP <b>LL</b> MGVTSALSTK <b>SWLS</b> AASFQNTTHVLEAA <b>IA</b> GKK <b>DEL</b> IGLKENVIL <b>GR</b> LIPAGTGSDFVRFTQV                    |
| <i>E. coli</i>          | 1292 | LEANGKVGATYSR <b>DL</b> L <b>G</b> ITKASLATESFISAA <b>SF</b> QETTRVLEAA <b>V</b> AGKR <b>DEL</b> RGLKENVIV <b>GR</b> LIPAGTGYAYHQDRMR          |
| <i>0_Nostoc</i>         | 1192 | MAITGGARATY <b>TP</b> V <b>LL</b> GITKASLNTDSFISAA <b>SF</b> QETTRVLEAA <b>IE</b> GK <b>SD</b> WL <b>R</b> GLKENVIL <b>GR</b> LIPAGTGYNTYEETSA |
| <i>1_Litchi</i>         | 1265 | LE----EAIRYRA <b>ILL</b> GITRASLNTQSFISEASFQETARV <b>AKA</b> ALRGRIDWLKGLKENVVL <b>GG</b> MPVGTGF-KGLVHCS                                      |
| <i>2_Arabidopsis</i>    | 1256 | LE----EAICYRA <b>VL</b> LGITRASLNTQSFISEASFQETARV <b>AKA</b> ALRGRIDWLKGLKENVVL <b>GG</b> VIPAGTGFN <b>KGL</b> VHCS                            |
| <i>3_Gossypium</i>      | 1264 | LE----EAICYRA <b>VL</b> LGITRASLNTQSFISEASFQETARV <b>AKA</b> ALRGRIDWLKGLKENVVL <b>GG</b> MPAGTGF-KGLVHRS                                      |
| <i>5_Ricinus</i>        | 1276 | LE----EAICYRA <b>ILL</b> GITRASLNTQSFISEASFQETARV <b>AKA</b> ALRGRIDWLKGLKENVVL <b>GG</b> MPVGTGF-KGLVQGS                                      |
| <i>6_Rosa</i>           | 1257 | LE----EAICYRA <b>ILL</b> GITRASLNTQSFISEASFQETARV <b>AKA</b> ALRGRIDWLKGLKENVVL <b>GG</b> MPVGTGF-KGFVPRS                                      |
| <i>9_Cucumis</i>        | 1265 | LE----EAICYRA <b>VL</b> LGITKASLNTQSFISEASFQETARV <b>AKA</b> ALRGRIDWL <b>R</b> GLKENVVL <b>GG</b> MPVGTGF-RELAHRS                             |
| <i>11_Nicotiana</i>     | 1261 | LE----EAICYR <b>V</b> LLGITRASLNTQSFISEASFQETARV <b>AKA</b> ALRGRIDWLKGLKENVVL <b>GG</b> VIPVGTGF-KGLVHPS                                      |
| <i>13_Syringa</i>       | 1267 | LE----EAVCYRA <b>VL</b> LGITRASLNTQSFISEASFQETARV <b>AKA</b> ALRGRIDWLKGLKENVVL <b>GG</b> MIPL <b>GT</b> GL-KGLVPPS                            |
| <i>18_Liquidambar</i>   | 1263 | LE----EAICYRA <b>ILL</b> GITKASLNTQSFISEASFQETARV <b>AKA</b> ALRGRIDWLKGLKENVVL <b>GG</b> MPVGTGF-KGLVHHS                                      |
| <i>19_Papaver</i>       | 1260 | LE----EAICYRA <b>VL</b> LGITRASLNTQSFISEASFQETARV <b>AKA</b> ALRGRIDWLKGLKENVVL <b>GG</b> MPVGTGF-KGLVYHS                                      |
| <i>20_Ananas</i>        | 1253 | <b>LD</b> ----ESICYRA <b>ILL</b> GITRASLNTQSFISEASFQETARV <b>AKA</b> ALRGRIDWLKGLKENVVL <b>GG</b> IIPVGTGF-QKFVHRS                             |
| <i>28_Liriodendron</i>  | 1255 | LE----EGICYRA <b>ILL</b> GITRASLNTQSFISEASFQETARV <b>AKA</b> ALRGRIDWLKGLKENVVL <b>GG</b> MPVGTGF-KGLVHRS                                      |
| <i>30_Magnolia</i>      | 1255 | LE----EAICYRA <b>ILL</b> GITRASLNTQSFISEASFQETARV <b>AKA</b> ALRGRIDWLKGLKENVVL <b>GG</b> MPVGTGF-KGLVHRS                                      |
| <i>32_Nymphaea</i>      | 1262 | LE----EAICYRA <b>VL</b> LGITRASLNTQSFISEASFQETARV <b>AKA</b> ALRGRIDWLKGLKENVVL <b>GG</b> MPVGTGF-KRFVHRS                                      |
| <i>33_Amborella</i>     | 1236 | LE----EAICYRA <b>ILL</b> GIT <b>K</b> ASLNTQSFISEASFQETARV <b>AKA</b> ALRGRIDWLKGLKENVVL <b>GG</b> MPVGTGF-KGLVHCS                             |
| <i>35_Picea</i>         | 1098 | LE----EAIY <b>Y</b> QT <b>ML</b> LGITRASLNTQSFISEASFQETARV <b>AKA</b> AL <b>Q</b> GRIDWLKGLKENVIL <b>GG</b> IIPAGTGF-H-- <b>I</b> HRS          |
| <i>44_Ginkgo</i>        | 1241 | LE----EAIY <b>Y</b> RT <b>VL</b> LGITRASLNTQSFISEASFQETARV <b>AKA</b> ALRGRIDWLKGLKENVIL <b>GG</b> IIPAGTGF-KRFLRS                             |
| <i>51_Physcomitrium</i> | 1212 | LE----EVIPY <b>K</b> VL <b>LL</b> GITKASLNTQSFISEASFQETTRV <b>AKA</b> ALRGRIDWLKGLKENVIL <b>GG</b> IIP <b>IT</b> GTGCEEVLWOIT                  |

|                         |      |                                                                                     |
|-------------------------|------|-------------------------------------------------------------------------------------|
| <i>T. thermophilus</i>  | 1487 | VDQKTLKAIEEARKE-AVEAKER-----PAARRGVK-----REQP-GKQA-----                             |
| <i>E. coli</i>          | 1372 | RR-----AAGEAAPAAP-QVTAEDA-----SASLAELL-----NAGLGGSDNE-----                          |
| <i>0_Nostoc</i>         | 1272 | IDDY-ATDI-----SSSVLDEVDDPLDMVLDDRRTARTYNLDAPTLGEPYSYGSRRRAERSILDDDDLIADAVEADEEDYEDD |
| <i>1_Litchi</i>         | 1340 | R-QHNNILLETQKNT--LFGGV--RDILLHHRELFDFCIS-----KTLR--DTSEQSL--                        |
| <i>2_Arabidopsis</i>    | 1332 | R-QHTNIILEKKTKNALLFEGDM--DILFYHREFCDSSIS-----KSDFSRI-----                           |
| <i>3_Gossypium</i>      | 1339 | R-QHNNILLETKKKN--FFGGEMR--DIFHHRELFDFSCIS-----NNLH--DTSGRSF--                       |
| <i>5_Ricinus</i>        | 1351 | R-QYKNIPLTKKKNN--LFGGEFRDRDILFHHRELFYSCIS-----KNFY--DTSEQSF--                       |
| <i>6_Rosa</i>           | 1332 | R-QHNNISLETKNKS--LFEGEMR--DILVHHRELFDFCIS-----KNLH--DTSEQSF--                       |
| <i>9_Cucumis</i>        | 1340 | R-QHNNIPLEPPPKK--IFEGEMR--DILFHHKELFDFFIS-----TNLH--DTSEQAF--                       |
| <i>11_Nicotiana</i>     | 1336 | K-QHNNIPLETKKKN--LFEGEMR--DILFHHKKLFDSCLS-----KNFH--DIPEQSF--                       |
| <i>13_Syringa</i>       | 1342 | K-QDSNSPLETKKNN--LFEGEMR--DILFHHKKLFDSCLS-----KNFH--DTSEQSF--                       |
| <i>18_Liquidambar</i>   | 1338 | R-QHNNIPLETKKKN--LFEGEMR--DILFHHRELFHSCIS-----KNFH--DISEQSF--                       |
| <i>19_Papaver</i>       | 1335 | R-QHSNIPFEIKKNN--LFRGGFR--DILFQHKELFDSYIP-----KNIH--DPSEQLF--                       |
| <i>20_Ananas</i>        | 1328 | R-QDKNIYLEIKRKN--LFELEMR--DILLHHRELFCSCAT-----NMFHETNLHETSEQSF--                    |
| <i>28_Liriodendron</i>  | 1330 | R-QHNNIPLEIKKKN--LFEGEMR--DILFHHRELLSSCIP-----KNFH--DTSEQSF--                       |
| <i>30_Magnolia</i>      | 1330 | R-QHNNIPLEIKKKN--LFEGEMR--DILFHHRELLSSCIP-----KNFH--DTSEQSF--                       |
| <i>32_Nymphaea</i>      | 1337 | R-EYNNIPLEIQKKN--FFGGEMR--DILFHHRELFCSICIP-----KPK--SFHNTSEQPF--                    |
| <i>33_Amborella</i>     | 1311 | R-KHNNIPLEPKNKN--LFEWEMR--DILFHHRELFSCIS-----KNGTSSLFFTLKKKKRE-----EVWGEM           |
| <i>35_Picea</i>         | 1171 | G-ERNKMDPRMGNRN--LFSKKVK--DIFFYHKKVSFFSIQ-----ENSHNLLKQPFK-----                     |
| <i>44_Ginkgo</i>        | 1316 | E-ERNKIDSRMGNKN--LFNKNVK--DIFSHHGKVSVSPIK-----DNYHNTLLKQPLCENSVD-----K-----         |
| <i>51_Physcomitrium</i> | 1288 | LEKOKNTLLKKNK--SKLFHNKVK--DIFLYK-KLSTSETS-----EKIHKNY-----                          |

| Species                | Accession | Sequence                                                                         |
|------------------------|-----------|----------------------------------------------------------------------------------|
| <i>T. thermophilus</i> |           | DEDEDDFDDE                                                                       |
| <i>E. coli</i>         |           | RGFNKS                                                                           |
| 0_Nostoc               | 1346      | DEDEDDFDDE                                                                       |
| 1_Litchi               | 1386      | RGFNKS                                                                           |
| 2_Arabidopsis          |           |                                                                                  |
| 3_Gossypium            | 1386      | IGIEFND-S                                                                        |
| 5_Ricinus              | 1400      | IGFNDS                                                                           |
| 6_Rosa                 | 1379      | FGFNDS                                                                           |
| 9_Cucumis              | 1387      | LGFNDS                                                                           |
| 11_Nicotiana           | 1383      | IGFNDS                                                                           |
| 13_Syringa             | 1389      | IGFNDS                                                                           |
| 18_Liquidambar         | 1385      | MGFNDS                                                                           |
| 19_Papaver             | 1382      | TGFNDS                                                                           |
| 20_Ananas              | 1380      | MRFNDS                                                                           |
| 28_Liriodendron        | 1377      | TGFNDS                                                                           |
| 30_Magnolia            | 1377      | TGFNDS                                                                           |
| 32_Nymphaea            | 1386      | YTMGNSNP-ISGFIIIS                                                                |
| 33_Amborella           | 1370      | TRRYWNIILEEMMEAGVHFGHGTTKKWNPRMAPYISAKRKGIIHINLRTARFLSEACDLVFDAASRGKQFLIVGTKNKAA |
| 35_Picea               |           |                                                                                  |
| 44_Ginkgo              |           |                                                                                  |
| 51_Physcomitrium       |           |                                                                                  |

|                        |                                                                                      |
|------------------------|--------------------------------------------------------------------------------------|
| <i>T. thermophilus</i> | -----                                                                                |
| <i>E. coli</i>         | -----                                                                                |
| 0_Nostoc               | -----                                                                                |
| 1_Litchi               | -----                                                                                |
| 2_Arabidopsis          | -----                                                                                |
| 3_Gossypium            | -----                                                                                |
| 5_Ricinus              | -----                                                                                |
| 6_Rosa                 | -----                                                                                |
| 9_Cucumis              | -----                                                                                |
| 11_Nicotiana           | -----                                                                                |
| 13_Syringa             | -----                                                                                |
| 18_Liquidambar         | -----                                                                                |
| 19_Papaver             | -----                                                                                |
| 20_Ananas              | -----                                                                                |
| 28_Liriodendron        | -----                                                                                |
| 30_Magnolia            | -----                                                                                |
| 32_Nymphaea            | -----                                                                                |
| 33_Amborella           | 1450 DSVAGAAIKARCHYVNKKWLGMLTNWYTTETRLHKFRDLRTEQKTGRLNRLPKRDAAVLKRQLSHLQTYLGGIKYMTGL |
| 35_Picea               | -----                                                                                |
| 44_Ginkgo              | -----                                                                                |
| 51_Physcomitrium       | -----                                                                                |

|                        |                                                                                      |
|------------------------|--------------------------------------------------------------------------------------|
| <i>T. thermophilus</i> | -----                                                                                |
| <i>E. coli</i>         | -----                                                                                |
| 0_Nostoc               | -----                                                                                |
| 1_Litchi               | -----                                                                                |
| 2_Arabidopsis          | -----                                                                                |
| 3_Gossypium            | -----                                                                                |
| 5_Ricinus              | -----                                                                                |
| 6_Rosa                 | -----                                                                                |
| 9_Cucumis              | -----                                                                                |
| 11_Nicotiana           | -----                                                                                |
| 13_Syringa             | -----                                                                                |
| 18_Liquidambar         | -----                                                                                |
| 19_Papaver             | -----                                                                                |
| 20_Ananas              | -----                                                                                |
| 28_Liriodendron        | -----                                                                                |
| 30_Magnolia            | -----                                                                                |
| 32_Nymphaea            | -----                                                                                |
| 33_Amborella           | 1530 PDIVIIVDQEEYTALRECITLGIPTICLIDTNCDPDLADISIPANDDAIASIRLILNKLVFAILLYDISGVEVGQHFYW |
| 35_Picea               | -----                                                                                |
| 44_Ginkgo              | -----                                                                                |
| 51_Physcomitrium       | -----                                                                                |

|                        |                                                                                      |
|------------------------|--------------------------------------------------------------------------------------|
| <i>T. thermophilus</i> | -----                                                                                |
| <i>E. coli</i>         | -----                                                                                |
| 0_Nostoc               | -----                                                                                |
| 1_Litchi               | -----                                                                                |
| 2_Arabidopsis          | -----                                                                                |
| 3_Gossypium            | -----                                                                                |
| 5_Ricinus              | -----                                                                                |
| 6_Rosa                 | -----                                                                                |
| 9_Cucumis              | -----                                                                                |
| 11_Nicotiana           | -----                                                                                |
| 13_Syringa             | -----                                                                                |
| 18_Liquidambar         | -----                                                                                |
| 19_Papaver             | -----                                                                                |
| 20_Ananas              | -----                                                                                |
| 28_Liriodendron        | -----                                                                                |
| 30_Magnolia            | -----                                                                                |
| 32_Nymphaea            | -----                                                                                |
| 33_Amborella           | 1610 QIGGFQVHAQVLITSWVVIALLGSAILAVRNPQTIPTDGQNFFEYVLEFIRDVSKTQIGEEYGPWVPFIGTLFLFIFVS |
| 35_Picea               | -----                                                                                |
| 44_Ginkgo              | -----                                                                                |
| 51_Physcomitrium       | -----                                                                                |

|                        |                                                  |
|------------------------|--------------------------------------------------|
| <i>T. thermophilus</i> | -----                                            |
| <i>E. coli</i>         | -----                                            |
| 0_Nostoc               | -----                                            |
| 1_Litchi               | -----                                            |
| 2_Arabidopsis          | -----                                            |
| 3_Gossypium            | -----                                            |
| 5_Ricinus              | -----                                            |
| 6_Rosa                 | -----                                            |
| 9_Cucumis              | -----                                            |
| 11_Nicotiana           | -----                                            |
| 13_Syringa             | -----                                            |
| 18_Liquidambar         | -----                                            |
| 19_Papaver             | -----                                            |
| 20_Ananas              | -----                                            |
| 28_Liriodendron        | -----                                            |
| 30_Magnolia            | -----                                            |
| 32_Nymphaea            | -----                                            |
| 33_Amborella           | 1690 NWSGALLPWKIIELPHGELAAPTNDINTTVALALLTRFHKLIT |
| 35_Picea               | -----                                            |
| 44_Ginkgo              | -----                                            |
| 51_Physcomitrium       | -----                                            |

**Figure S6:** view of the catalytic core from the *E. coli* RNAP (PDB entry: 3LU0 (Opalka *et al.*, 2010)) manually fitted into the envelope of PEP using Chimera (Pettersen *et al.*, 2004).

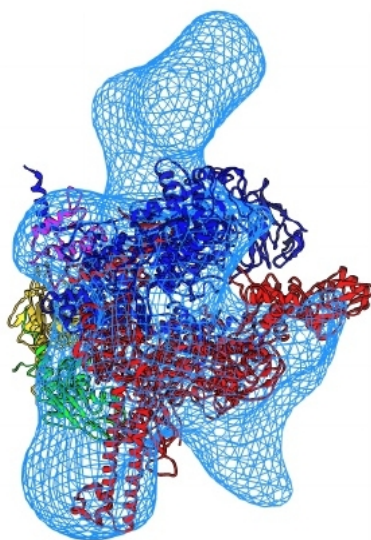



**Figures S7a and S7b:** overall shape of the a) human RNA polymerase II (EMDB entry: EMD-2194; Kassube *et al.*, 2013) and b) yeast RNA polymerase III (EMDB entry: EMD-1753; Vanini *et al.*, 2010) solved at 25 and 21 Å respectively.:

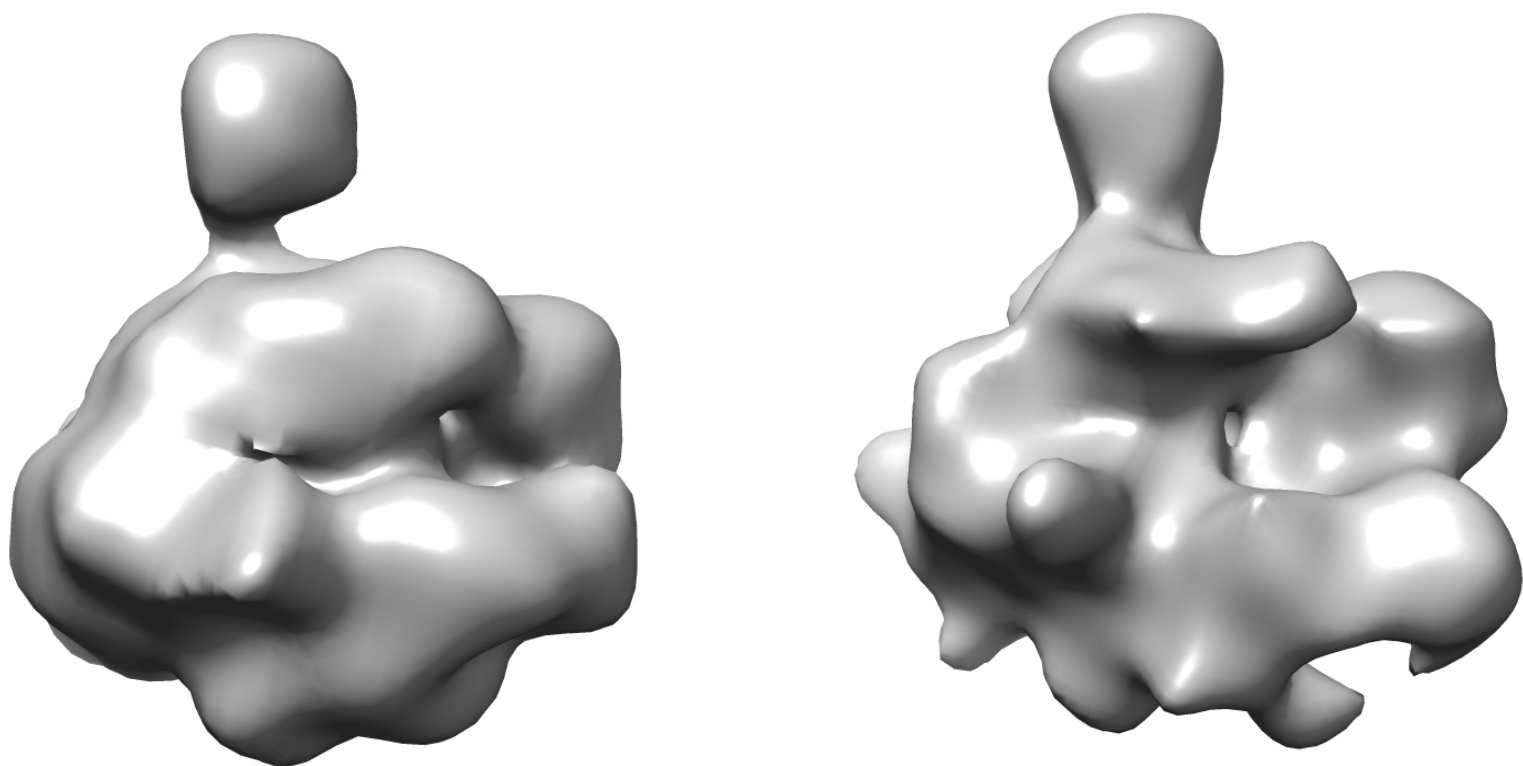



**Figure S8:** FSC curve for the PEP 3D reconstruction calculated between two independent half maps (gold standard FSC). The dotted line represents the FSC=0.143 cutoff used to determine the resolution.

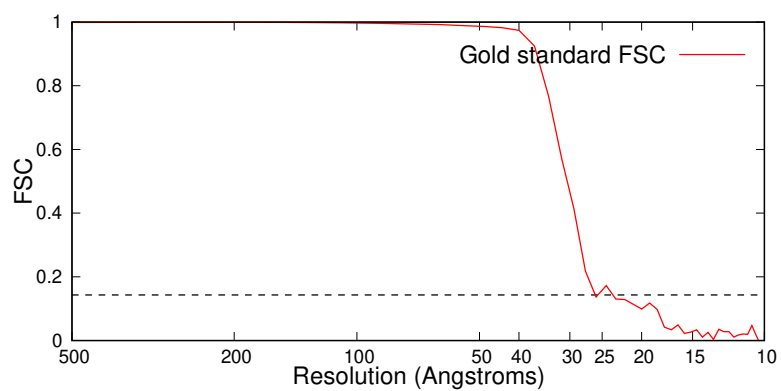

Supplement: s1 [file s1]
